# Supplementary material for: Electrochemical [3 + 2]/[4 + 2] cyclization to indole-fused polycyclics
Source: Royal Society of Chemistry journal article supplement (doi:10.1039/d5qo00353a), 2025-01-01

## Electrochemical [3+2]/[4+2] cyclization to indole-fused polycyclics

Chengcheng Yuan,<sup>a</sup> Lufang Liao,<sup>a</sup> Chengkou Liu,<sup>\*a</sup> Yaqi Qiao,<sup>a</sup> Zheng Fang,<sup>a</sup> Zefu Zheng,<sup>b,c</sup> and Kai Guo<sup>a,d</sup>

<sup>a</sup>College of Biotechnology and Pharmaceutical Engineering, Nanjing Tech University, Nanjing, 211816, China. E-mail: liuchengkou@njtech.edu.cn.

<sup>b</sup>Railway Engineering Research Institute, China Academy of Railway Sciences Corporation Limited, Beijing, 100081, China.

<sup>c</sup>State Key Laboratory for Track System of High-speed Railway, China Academy of Railway Sciences Corporation Limited, Beijing, 100081, China.

<sup>d</sup>State Key Laboratory of Materials-Oriented Chemical Engineering, Nanjing Tech University, Nanjing, 211816, China.

### Table of Contents

|    | Contents                                                                             | Page    |
|----|--------------------------------------------------------------------------------------|---------|
| 1  | General information                                                                  | S2      |
| 2  | Additional optimization of the electrolysis conditions for the synthesis of <b>3</b> | S3-S6   |
| 3  | Unsuccessful and low yielding examples                                               | S7      |
| 4  | General procedure for the electrosynthesis of indole-fused systems                   | S7      |
| 5  | The gram-scale synthesis of product <b>3</b>                                         | S8      |
| 6  | Mechanistic studies                                                                  | S8-S16  |
| 7  | Synthesis of substrates                                                              | S16-S17 |
| 8  | Characterization data for electrolysis products                                      | S18-S43 |
| 9  | X-ray crystallography studies of compound <b>20</b>                                  | S43-S44 |
| 10 | References                                                                           | S44     |
| 11 | NMR Spectra for electrolysis products                                                | S45-S75 |

## 1. General information

Commercially available reagents and solvents are of reagent grade quality without further purification. Analytical thin-layer chromatography (TLC) is performed on 0.2 mm coated silica gel plates (HSGF 254) and visualized using a UV lamp (254 or 365 nm). Flash column chromatography is performed using silicycle silica gel (200-300 mesh).  $^1\text{H}$  NMR and  $^{13}\text{C}$  NMR are recorded on magnet system 400' 54 ascend purchased from Bruker Biospin AG. HRMS (ESI) spectra are recorded on Agilent Q-TOF 6520.

This electrochemically generated C-centered radicals toward N-hetero fused polycyclics was carried out in an undivided cell equipped with a RVC anode and a platinum plate cathode under open air. The carbon cloth, graphite rod ( $\varnothing$  6 mm), platinum plate, Ni plate and Fe plate were purchased from Shanghai Jing Chong Electronic Technology Development Co., Ltd. Reticulated vitreous carbon (RVC) was purchased from Gaoss Union (Tianjin) Photoelectric Technology Co., Ltd. Electrolysis was conducted under an AXIOMET AX3003P potentiostat in constant current mode. Cyclic voltammogram experiments were investigated using a Metrohm Autolab PGSTAT204 workstation and Nova 2.0 software.

## 2. Additional optimization of the electrolysis conditions for the synthesis of **3**

**Table S1. The screening of base.<sup>a</sup>**

| 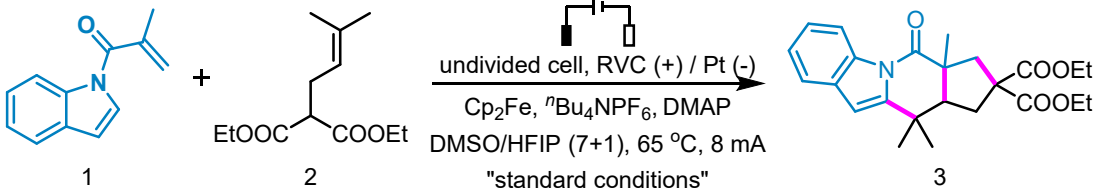 |                                                  |                        |
|------------------------------------------------------------------------------------|--------------------------------------------------|------------------------|
| Entry                                                                              | Variation from “standard conditions”             | Yield (%) <sup>b</sup> |
| 1                                                                                  | none                                             | 75                     |
| 2                                                                                  | KOAc instead of DMAP                             | 0                      |
| 3                                                                                  | K <sub>2</sub> HPO <sub>4</sub> instead of DMAP  | 30                     |
| 4                                                                                  | KH <sub>2</sub> PO <sub>4</sub> instead of DMAP  | 23                     |
| 5                                                                                  | K <sub>2</sub> CO <sub>3</sub> instead of DMAP   | 37                     |
| 6                                                                                  | NaOPiv instead of DMAP                           | 30                     |
| 7                                                                                  | NaOH instead of DMAP                             | 53                     |
| 8                                                                                  | NaH instead of DMAP                              | 0                      |
| 9                                                                                  | <sup>t</sup> BuOK instead of DMAP                | 0                      |
| 10                                                                                 | NaOAc instead of DMAP                            | 31                     |
| 11                                                                                 | Na <sub>2</sub> HPO <sub>4</sub> instead of DMAP | 18                     |
| 12                                                                                 | Cs <sub>2</sub> CO <sub>3</sub> instead of DMAP  | 13                     |
| 13                                                                                 | TEA instead of DMAP                              | 40                     |
| 14                                                                                 | DIPEA instead of DMAP                            | trace                  |
| 15                                                                                 | DBU instead of DMAP                              | 0                      |

<sup>a</sup>Reaction conditions: N-methacryloylindole **1** (0.3 mmol, 55.5 mg),  $\alpha$ -allyl activated methylene **2** (0.75 mmol, 171.1 mg), Cp<sub>2</sub>Fe (0.15 mmol, 27.9 mg), base (0.3 mmol), <sup>t</sup>Bu<sub>4</sub>NPF<sub>6</sub> (0.6 mmol, 232.2 mg), DMSO/HFIP (7/1, 8 mL), 65 °C, 8 mA, 3-4 h; undivided cell, RVC anode (100 PPI, 10 mm × 10 mm × 12 mm), platinum plate cathode (10 mm × 10 mm × 0.1 mm). <sup>b</sup>Yields are determined by HPLC analysis with **3** as the external standard.

**Table S2. The screening of solvent.<sup>a</sup>**

| Entry | Variation from “standard conditions” | Yield (%) <sup>b</sup> |
|-------|--------------------------------------|------------------------|
| 1     | none                                 | 75                     |
| 2     | DMSO/HFIP 6/2                        | 37                     |
| 3     | DMSO/HFIP 5/3                        | 0                      |
| 4     | DMSO/HFIP 4/4                        | 0                      |
| 5     | DMSO/HFIP 8/1                        | 22                     |
| 6     | DMSO/HFIP 8/0.1                      | 26                     |
| 7     | DMSO/TFE 7/1                         | 0                      |
| 8     | DMSO/EtOH 7/1                        | 0                      |
| 9     | DMSO/ <sup>t</sup> BuOH 7/1          | 0                      |
| 10    | DMSO/AcOH 7/1                        | 0                      |
| 11    | DMF/HFIP 7/1                         | 0                      |
| 12    | ACN/HFIP 7/1                         | 0                      |
| 13    | 1,4-Dioxane/HFIP 7/1                 | 0                      |
| 14    | DMSO/HFIP/EtOH 7/1/1                 | 22                     |
| 15    | DMSO/HFIP/TFE 7/1/1                  | 21                     |
| 16    | DMSO/HFIP/AcOH 7/1/1                 | 0                      |
| 17    | DMSO/HFIP/TFA 7/1/1                  | trace                  |
| 18    | DMSO/HFIP/MTBE 7/1/1                 | 33                     |

<sup>a</sup>Reaction conditions: N-methacryloylindole **1** (0.3 mmol, 55.5 mg),  $\alpha$ -allyl activated methylene **2** (0.75 mmol, 171.1 mg), Cp<sub>2</sub>Fe (0.15 mmol, 27.9 mg), DMAP (0.3 mmol, 36.6 mg), <sup>t</sup>Bu<sub>4</sub>NPF<sub>6</sub> (0.6 mmol, 232.2 mg), solvent (8 mL), 65 °C, 8 mA, 3-4 h; undivided cell, RVC anode (100 PPI, 10 mm × 10 mm × 12 mm), platinum plate cathode (10 mm × 10 mm × 0.1 mm). <sup>b</sup>Yields are determined by HPLC analysis with **3** as the external standard.

**Table S3. The screening of electrode.<sup>a</sup>**

| Entry | Variation from “standard conditions” | Yield (%) <sup>b</sup> |
|-------|--------------------------------------|------------------------|
| 1     | none                                 | 75                     |
| 2     | C cloth (+) / Pt (-)                 | 48                     |
| 3     | C rod (+) / Pt (-)                   | 15                     |
| 4     | Pt (+) / Pt (-)                      | trace                  |
| 5     | RVC (+) / Fe (-)                     | 53                     |
| 6     | RVC (+) / Ni (-)                     | 32                     |
| 7     | RVC (+) / RVC (-)                    | 47                     |

<sup>a</sup>Reaction conditions: N-methacryloylindole **1** (0.3 mmol, 55.5 mg),  $\alpha$ -allyl activated methylene **2** (0.75 mmol, 171.1 mg),  $\text{Cp}_2\text{Fe}$  (0.15 mmol, 27.9 mg), DMAP (0.3 mmol, 36.6 mg),  $n\text{Bu}_4\text{NPF}_6$  (0.6 mmol, 232.2 mg), DMSO/HFIP (7/1, 8 mL), 65 °C, 8 mA, 3-4 h; undivided cell, anode, cathode, C cloth (35 mm  $\times$  15 mm), C rod ( $\varnothing$  6 mm), RVC (100 PPI, 10 mm  $\times$  10 mm  $\times$  12 mm), Pt plate (10 mm  $\times$  10 mm  $\times$  0.1 mm), Fe plate (10 mm  $\times$  10 mm  $\times$  0.1 mm), Ni plate (10 mm  $\times$  10 mm  $\times$  0.1 mm). <sup>b</sup>Yields are determined by HPLC analysis with **3** as the external standard.

**Table S4. The screening of current density, additive and the amount of additive, substrate and catalyst.<sup>a</sup>**

| 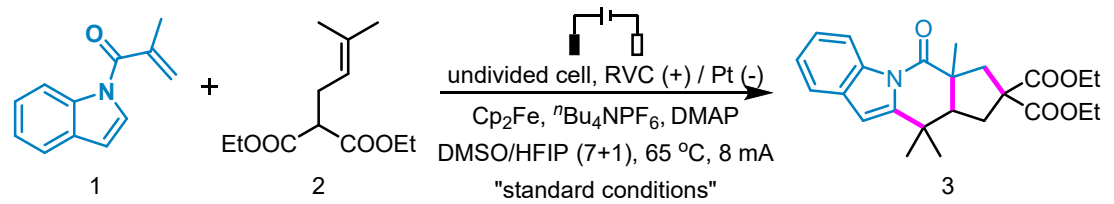 |                                      |           |
|------------------------------------------------------------------------------------|--------------------------------------|-----------|
| Entry                                                                              | Variation from “standard conditions” | Yield (%) |
| 1                                                                                  | none                                 | 75        |
| 2                                                                                  | 4 mA                                 | 48        |
| 3                                                                                  | 12 mA                                | 34        |
| 4                                                                                  | 16 mA                                | 50        |
| 5                                                                                  | DMAP (0.4 eq)                        | 52        |
| 6                                                                                  | DMAP (0.6 eq)                        | 35        |
| 7                                                                                  | DMAP (0.8 eq)                        | 44        |
| 8                                                                                  | DMAP (1.2 eq)                        | 47        |
| 9                                                                                  | DMAP (1.4 eq)                        | 29        |
| 10                                                                                 | DMAP + TsOH instead of DMAP          | 0         |
| 11                                                                                 | DMAP + TFA instead of DMAP           | 0         |
| 12                                                                                 | DMAP + AcOH instead of DMAP          | 0         |
| 13                                                                                 | DMAP + PivOH instead of DMAP         | 15        |
| 14                                                                                 | <b>2</b> (1.5 eq)                    | 31        |
| 15                                                                                 | <b>2</b> (2 eq)                      | 36        |
| 16                                                                                 | <b>2</b> (3 eq)                      | 71        |
| 17                                                                                 | Cp <sub>2</sub> Fe (0.2 eq)          | 60        |
| 18                                                                                 | Cp <sub>2</sub> Fe (1 eq)            | 48        |

<sup>a</sup>Reaction conditions: N-methacryloylindole **1** (0.3 mmol, 55.5 mg),  $\alpha$ -allyl activated methylene **2** (0.75 mmol), Cp<sub>2</sub>Fe (x mmol), DMAP (x mmol), *n*Bu<sub>4</sub>NPF<sub>6</sub> (0.6 mmol, 232.2 mg), additive (0.3 mmol), DMSO/HFIP (7/1, 8 mL), 65 °C, x mA, 3–4 h; undivided cell, RVC anode (100 PPI, 10 mm × 10 mm × 12 mm), platinum plate cathode (10 mm × 10 mm × 0.1 mm). <sup>b</sup>Yields are determined by HPLC analysis with **3** as the external standard.

### 3. Unsuccessful and low yielding examples

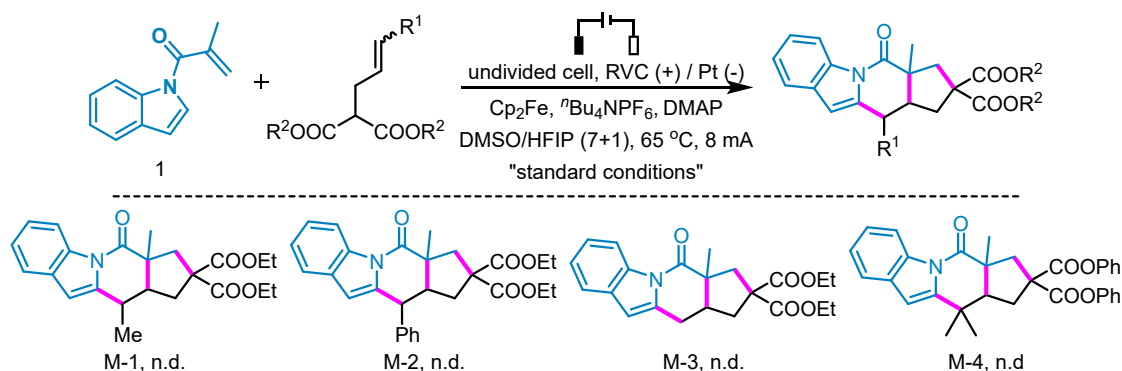

Scheme S1 Unsuccessful and low yielding examples.

### 4. General procedure for the electrocyclic synthesis of indole-fused systems

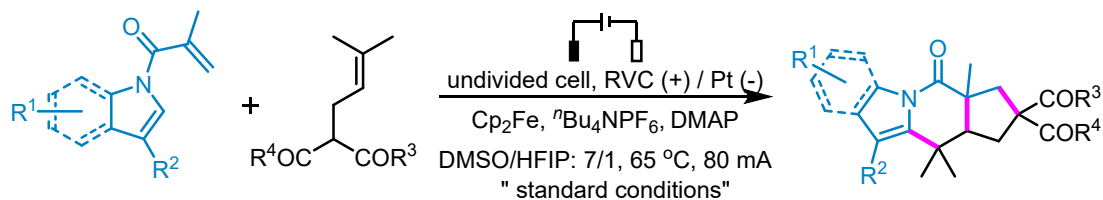

In an undivided cell equipped with a RVC anode (100 PPI, 10 mm x 10 mm x 12 mm) and a Pt plate cathode (10 mm x 10 mm x 0.1 mm), N-methacryloylindole (0.3 mmol),  $\alpha$ -allyl activated methylene (0.75 mmol),  $t\text{Bu}_4\text{NPF}_6$  (0.6 mmol, 232.2 mg),  $\text{Cp}_2\text{Fe}$  (0.15 mmol, 27.9 mg) and DMAP (0.3 mmol, 36.6 mg) were added in a mixed solvent of DMSO/HFIP (7/1, 8 mL). The mixture above was stirred and electrolyzed at a constant current of 8 mA under 65 °C for 3-4 h. The reaction solution was diluted with ethyl acetate (100 mL) and washed with saturated NaCl aqueous solution (50 mL) and H<sub>2</sub>O (100 mL x 3). The separated organic layer was dried over anhydrous Na<sub>2</sub>SO<sub>4</sub> and filtered. The filtrate was concentrated under reduced pressure to give the crude product, which was purified by column chromatographic separation (petroleum ether/ethyl acetate: 200:1) to obtain the desired product.

## 5. The gram-scale synthesis of product 3

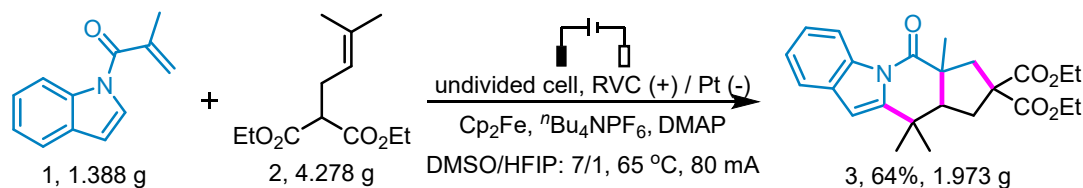

In a 100 mL beaker equipped with RVC anode (100 PPI, 40 mm x 40 mm x 40 mm) and a Pt plate cathode (40 mm x 40 mm x 0.2 mm), N-methacryloylindole (7.5 mmol, 1.388 g),  $\alpha$ -allyl activated methylene (18.75 mmol, 4.278 g),  $^t\text{Bu}_4\text{NPF}_6$  (15 mmol, 3.483 g),  $\text{Cp}_2\text{Fe}$  (3.75 mmol, 0.688 g) and DMAP (7.5 mmol, 0.915 g) were added in a mixed solvent of DMSO/HFIP [(70+10) mL]. At 65  $^\circ\text{C}$ , the reaction was started at a constant current of 80 mA for 6.5 h. The reaction solution was diluted with ethyl acetate (150 mL) and washed with brine (150 mL) and  $\text{H}_2\text{O}$  (150 mL). The separated organic layer was dried over anhydrous  $\text{Na}_2\text{SO}_4$  (2 g) and filtered. The filtrate was concentrated under reduced pressure to give the crude product, which was purified by column chromatographic separation (petroleum ether/ethyl acetate: 200/1, yellow oil, 1.973 g, 64%).

## 6. Mechanistic Studies

### 6.1 H/D exchange experiments

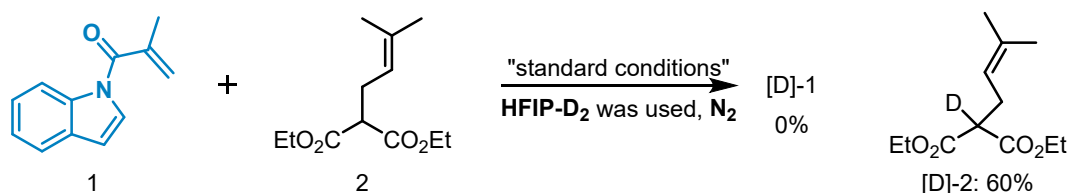

In an undivided cell equipped with a RVC anode (100 PPI, 10 mm x 10 mm x 12 mm) and a Pt plate cathode (10 mm x 10 mm x 0.1 mm), N-methacryloylindole **1** (0.3 mmol, 55.5 mg),  $\alpha$ -allyl activated methylene **2** (0.75 mmol, 171.1 mg),  $^t\text{Bu}_4\text{NPF}_6$  (0.6 mmol, 232.2 mg),  $\text{Cp}_2\text{Fe}$  (0.15 mmol, 27.9 mg) and DMAP (0.3 mmol, 36.6 mg) were

added in a mixed solvent of DMSO/HFIP-D<sub>2</sub> (7/1, 8 mL). The mixture above was stirred and electrolyzed at a constant current of 8 mA for 1 h under N<sub>2</sub>. The reaction solution was diluted with ethyl acetate (100 mL) and washed with saturated NaCl aqueous solution (50 mL) and H<sub>2</sub>O (100 mL x 3). The separated organic layer was dried over anhydrous Na<sub>2</sub>SO<sub>4</sub> and filtered. The filtrate was concentrated under reduced pressure to give the crude product, which was purified by column chromatographic separation (petroleum ether/ethyl acetate: 300:1) to give the starting materials **1** and **2**. It was found that 60% [D]-**2** was obtained which was conformed by <sup>1</sup>H NMR (Fig. S1).

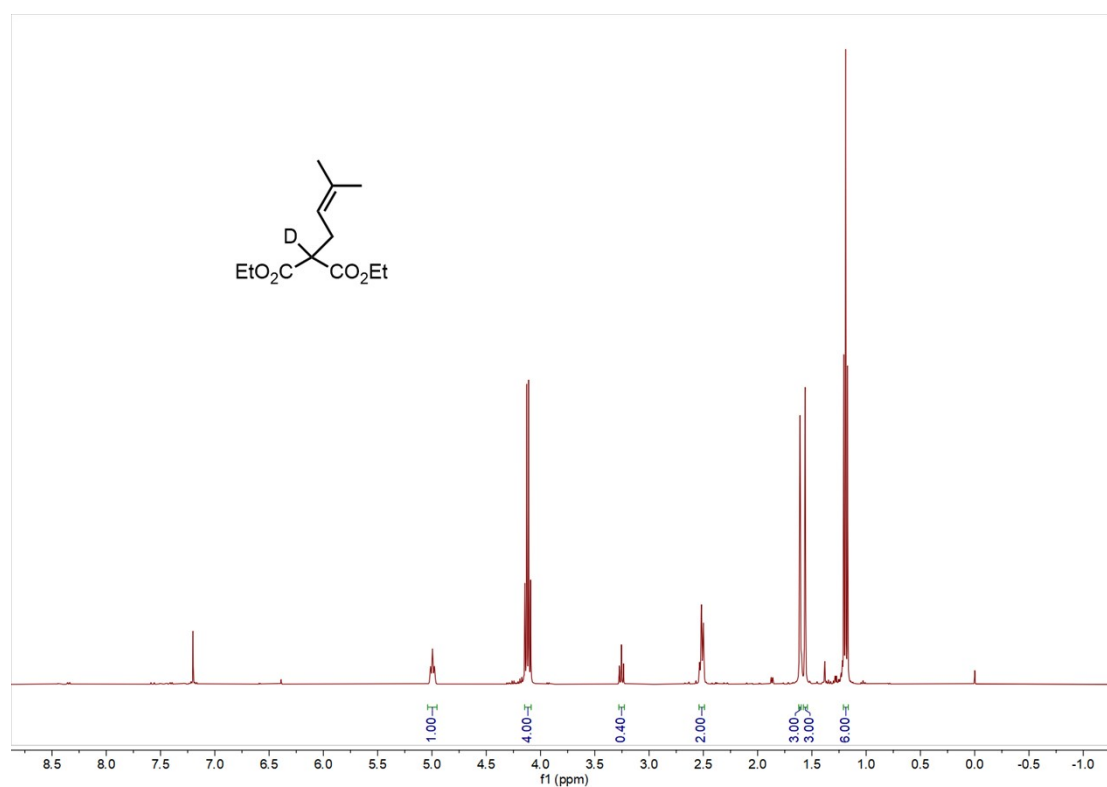

**Figure S1** <sup>1</sup>H NMR of **2** after electrolysis in the presence of HFIP-D<sub>2</sub> under N<sub>2</sub>

## 6.2 KIE studies

### 6.2.1 KIE experiment with **2** and D-**2** involved

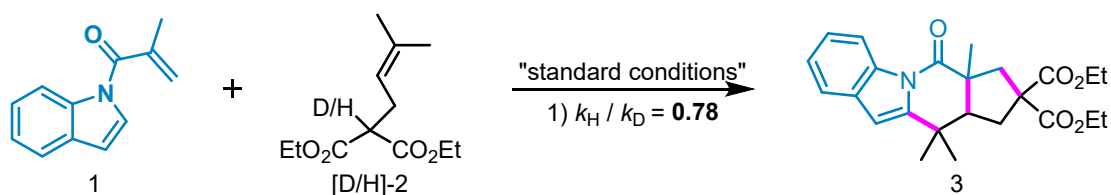

In an undivided cell equipped with a RVC anode (100 PPI, 10 mm x 10 mm x 12 mm) and a Pt plate cathode (10 mm x 10 mm x 0.1 mm), N-methacryloylindole **1** (0.3 mmol, 55.5 mg), **2** (0.75 mmol, 171.1 mg) or D-**2** (0.75 mmol, 171.8 mg),  $n\text{Bu}_4\text{NPF}_6$  (0.6 mmol, 232.2 mg),  $\text{Cp}_2\text{Fe}$  (0.15 mmol, 27.9 mg) and DMAP (0.3 mmol, 36.6 mg) were added in a mixed solvent of DMSO/HFIP (7/1, 8 mL). The mixture above was stirred and electrolyzed at a constant current of 8 mA under 65 °C. Aliquots of 0.1 mL were removed from the cell every 30 minutes and analyzed by HPLC with **3** as the external standard. The corresponding yields were listed in Table S5 (entry 1 and 2).

**Table S5** the yields of KIE studies.

| Entry | Time [h]                        | 1     | 1.5   | 2     | 2.5   |
|-------|---------------------------------|-------|-------|-------|-------|
| 1     | Yield when <b>2</b> was used    | 31.7% | 38.8% | 45.2% | 53.3% |
| 2     | Yield when D- <b>2</b> was used | 24.2% | 38.1% | 44.3% | 52.4% |
| 3     | Yield when D- <b>1</b> was used | 26.5% | 33.5% | 39.0% | 44.8% |

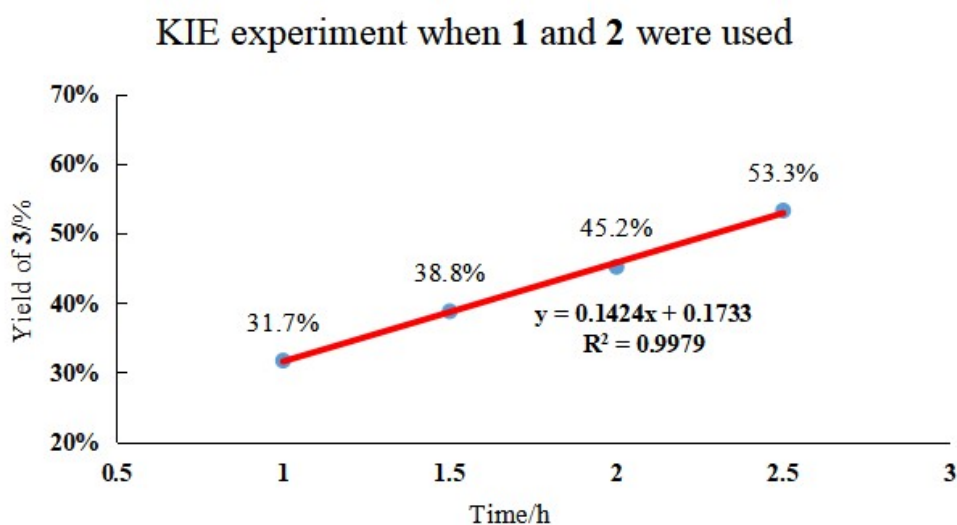

**Figure S2** Parallel experiment when **1** and **2** were used

### KIE experiment when **1** and D-**2** were used

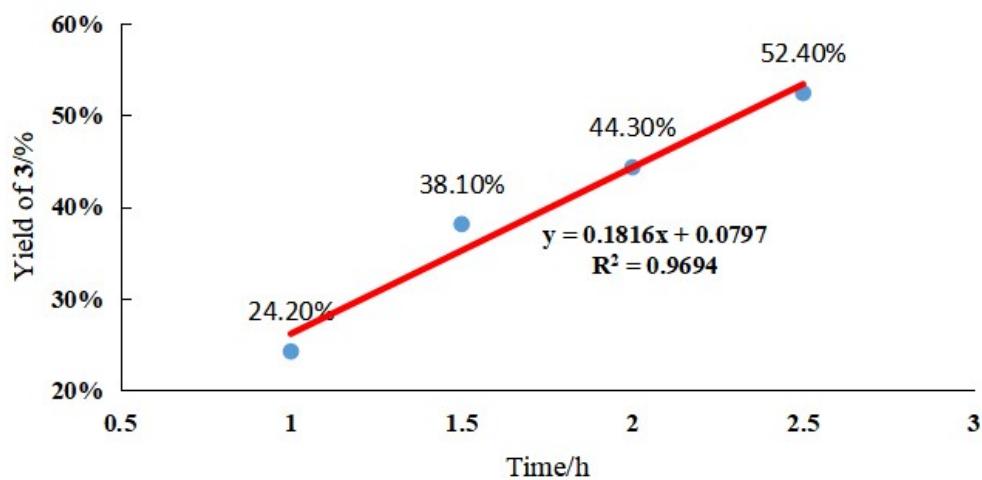

Figure S3 Parallel experiment when **1** and D-**2** were used

### 6.2.2 KIE experiment with **1** and D-**1** involved

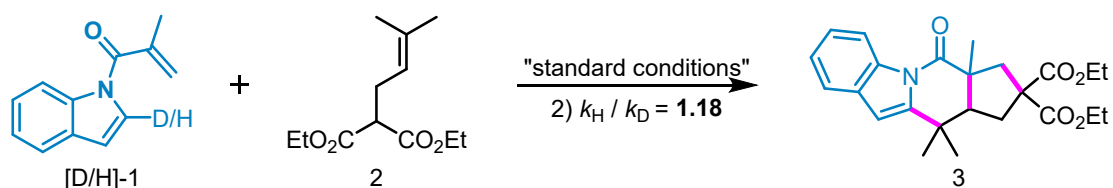

### KIE experiment when D-**1** and **2** were used

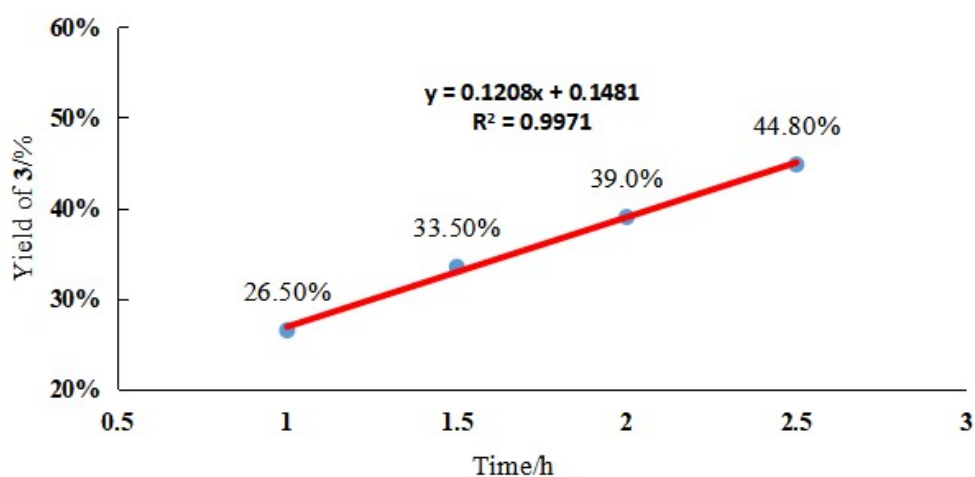

Figure S4 Parallel experiment when D-**1** and **2** were used

In an undivided cell equipped with a RVC anode (100 PPI, 10 mm x 10 mm x 12

mm) and a Pt plate cathode (10 mm x 10 mm x 0.1 mm), D-**1** (0.3 mmol, 55.8 mg),  $\alpha$ -allyl activated methylene **2** (0.75 mmol, 171.1 mg),  $n\text{Bu}_4\text{NPF}_6$  (0.6 mmol, 232.2 mg),  $\text{Cp}_2\text{Fe}$  (0.15 mmol, 27.9 mg) and DMAP (0.3 mmol, 36.6 mg) were added in a mixed solvent of DMSO/HFIP (7/1, 8 mL). The mixture above was stirred and electrolyzed at a constant current of 8 mA under 65 °C. Aliquots of 0.1 mL were removed from the cell every 30 minutes and analyzed by HPLC with **3** as the external standard. The corresponding yields were listed in Table S5 (entry 3).

## 6.3 Radical-trapping experiments

### 6.3.1 TEMPO was added

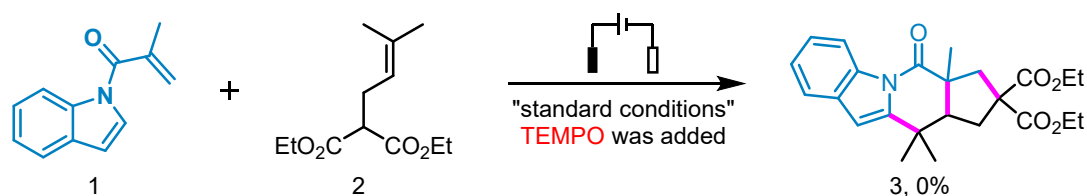

In an undivided cell equipped with a RVC anode (100 PPI, 10 mm x 10 mm x 12 mm) and a Pt plate cathode (10 mm x 10 mm x 0.1 mm), N-methacryloylindole **1** (0.3 mmol, 55.5 mg),  $\alpha$ -allyl activated methylene **2** (0.75 mmol, 171.1 mg),  $n\text{Bu}_4\text{NPF}_6$  (0.6 mmol, 232.2 mg),  $\text{Cp}_2\text{Fe}$  (0.15 mmol, 27.9 mg), DMAP (0.3 mmol, 36.6 mg) and TEMPO (0.9 mmol, 140.4 mg) were added in a mixed solvent of DMSO/HFIP (7/1, 8 mL). The mixture above was stirred and electrolyzed at a constant current of 8 mA for 3 h under the open air. However, no desired product **3** was detected.

### 6.3.2 BHT was added

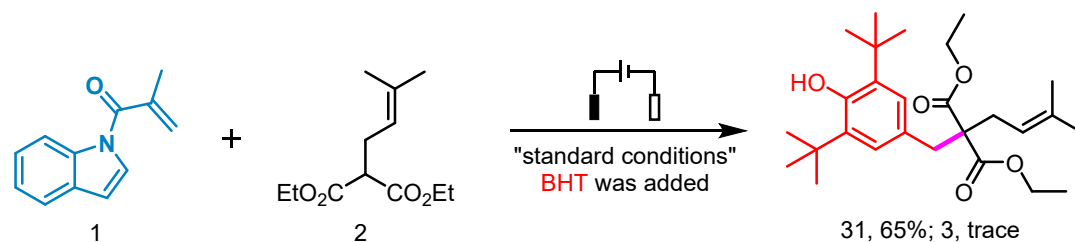

In an undivided cell equipped with a RVC anode (100 PPI, 10 mm x 10 mm x 12

mm) and a Pt plate cathode (10 mm x 10 mm x 0.1 mm), N-methacryloylindole **1** (0.3 mmol, 55.5 mg),  $\alpha$ -allyl activated methylene **2** (0.75 mmol, 171.1 mg),  $n\text{Bu}_4\text{NPF}_6$  (0.6 mmol, 232.2 mg),  $\text{Cp}_2\text{Fe}$  (0.15 mmol, 27.9 mg), DMAP (0.3 mmol, 36.6 mg) and BHT (0.9 mmol, 198.3 mg) were added in a mixed solvent of DMSO/HFIP (7/1, 8 mL). The mixture above was stirred and electrolyzed at a constant current of 8 mA for 3 h under the open air, only trace amounts of desired product **3** was detected. Moreover, the corresponding radical trapping product **31** was produced in 65% isolated yield..

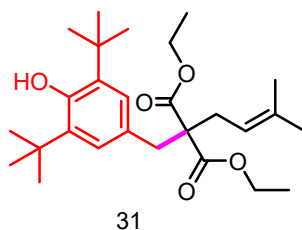

diethyl 2-(3,5-di-*tert*-butyl-4-hydroxybenzyl)-2-(3-methylbut-2-en-1-yl)malonate (**31**): Yellow oil; Eluent:petroluem ether/ethyl acetate 100:1; 65%, 217.4 mg;  $^1\text{H}$  NMR (400 MHz, Chloroform-*d*)  $\delta$  6.86 (s, 2H), 5.12 - 5.10 (m, 2H), 4.16 (qd,  $J = 7.1, 2.6$  Hz, 4H), 3.16 (s, 2H), 2.47 (d,  $J = 6.7$  Hz, 2H), 1.73 (s, 3H), 1.56 (s, 3H), 1.39 (s, 18H), 1.23 (t,  $J = 7.1$  Hz, 6H);  $^{13}\text{C}$  NMR (101 MHz,  $\text{CDCl}_3$ )  $\delta$  171.34, 152.58, 135.63, 134.90, 126.68, 126.42, 118.03, 61.02, 58.82, 37.88, 34.17, 30.45, 30.26, 26.00, 18.13, 14.00; HRMS (ESI-TOF) Calcd for  $\text{C}_{27}\text{H}_{43}\text{O}_5$   $[\text{M}+\text{H}]^+$ : 440.3105; found: 440.3096.

### 6.3.3 1,1-Diphenylethylene was added

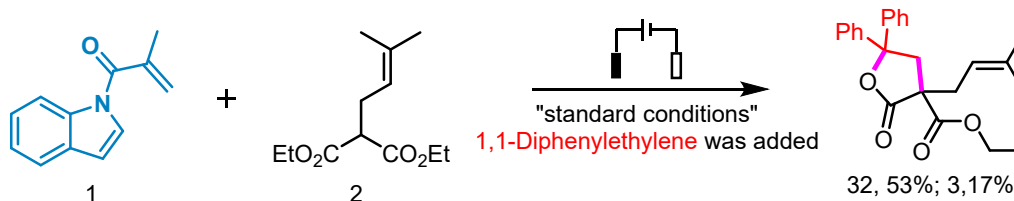

In an undivided cell equipped with a RVC anode (100 PPI, 10 mm x 10 mm x 12 mm) and a Pt plate cathode (10 mm x 10 mm x 0.1 mm), N-methacryloylindole **1** (0.3 mmol, 55.5 mg),  $\alpha$ -allyl activated methylene **2** (0.75 mmol, 171.1 mg),  $n\text{Bu}_4\text{NPF}_6$  (0.6 mmol, 232.2 mg),  $\text{Cp}_2\text{Fe}$  (0.15 mmol, 27.9 mg), DMAP (0.3 mmol, 36.6 mg) and 1,1-

diphenylethylene (0.9 mmol, 162.2 mg) were added in a mixed solvent of DMSO/HFIP (7/1, 8 mL). The mixture above was stirred and electrolyzed at a constant current of 8 mA for 3 h under the open air, 17% desired product was obtained. However, 53% radical trapping product **32** was formed..

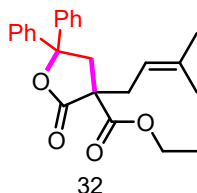

thyl 3-(4-methylpent-3-en-1-yl)-2-oxo-5,5-diphenyltetrahydrofuran-3-carboxylate  
(**32**):

White solid; Eluent:petroluem ether/ethyl acetate 100:1; 53%, 150.3 mg;  $^1\text{H}$  NMR (400 MHz, Chloroform-*d*)  $\delta$  7.45 (d,  $J$  = 7.7 Hz, 2H), 7.36 (d,  $J$  = 7.6 Hz, 2H), 7.29 (t,  $J$  = 7.5 Hz, 4H), 7.23 (d,  $J$  = 7.1 Hz, 2H), 5.08 (t,  $J$  = 7.0 Hz, 1H), 3.97 - 3.65 (m, 2H), 3.58 (d,  $J$  = 13.4 Hz, 1H), 2.88 (d,  $J$  = 13.4 Hz, 1H), 2.68 (dd,  $J$  = 14.4, 8.0 Hz, 1H), 2.54 (dd,  $J$  = 14.4, 6.8 Hz, 1H), 1.64 (s, 3H), 1.51 (s, 3H), 0.95 (t,  $J$  = 7.1 Hz, 3H);  $^{13}\text{C}$  NMR (101 MHz,  $\text{CDCl}_3$ )  $\delta$  173.52, 169.77, 144.13, 142.70, 137.25, 128.61, 128.36, 127.85, 127.80, 125.70, 125.24, 117.34, 87.22, 61.98, 56.11, 43.88, 33.38, 25.91, 17.98, 13.62; HRMS (ESI-TOF) Calcd for  $\text{C}_{25}\text{H}_{29}\text{O}_4$   $[\text{M}+\text{H}]^+$ : 379.1904; found: 379.1902.

## 6.4 Cyclic voltammetry experiments

The undivided cell was equipped with glassy-carbon disk working electrode (diameter, 3.0 mm) and Pt wire auxiliary electrode. The Ag/AgCl was used as reference electrode. The scan range was 0.0 V to 1.5 V. The scan rate was 100  $\text{mVs}^{-1}$ . A mixed solvent of DMSO/HFIP (7/1, 8 mL) containing  $n\text{Bu}_4\text{NPF}_6$  (0.6 mmol, 232.2 mg) was poured into the electrochemical cell in all experiments.

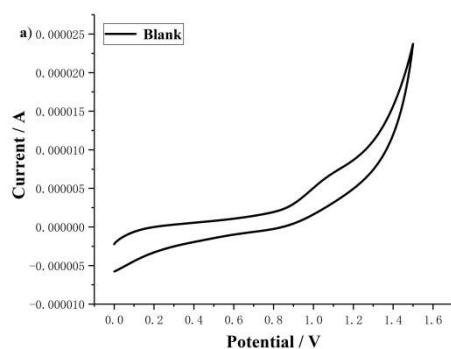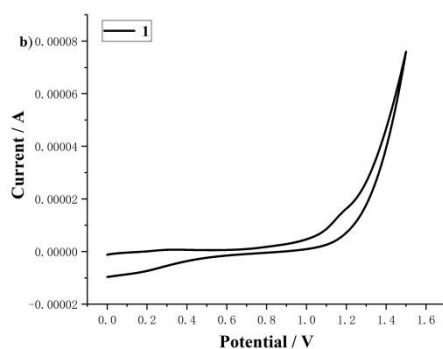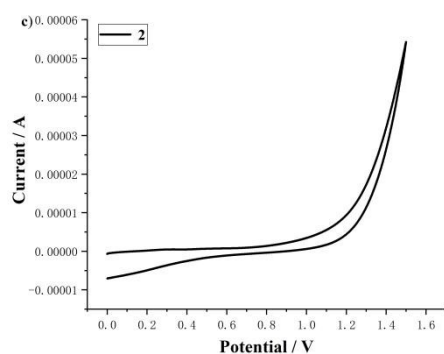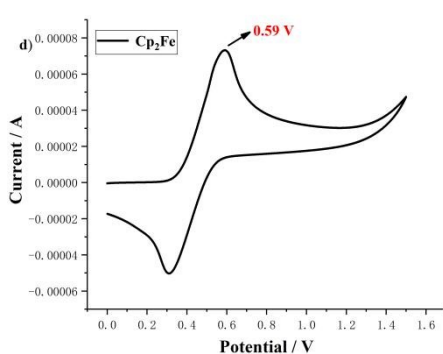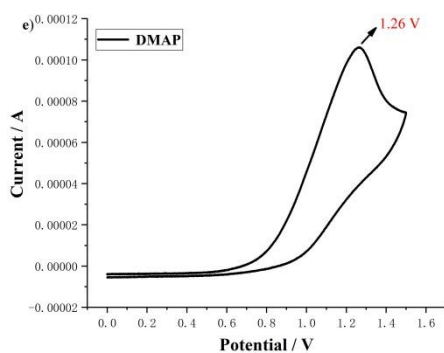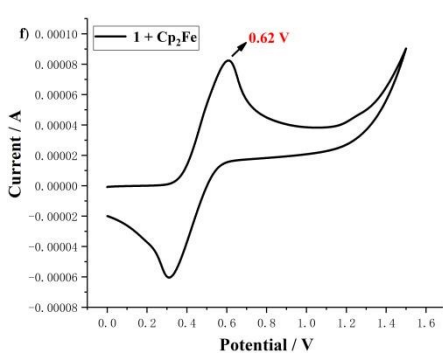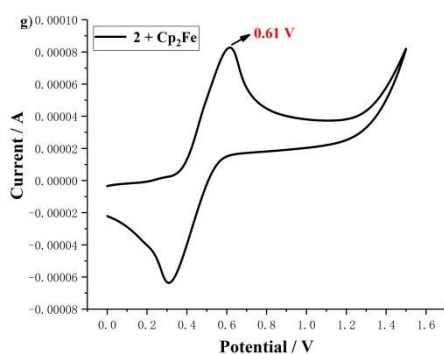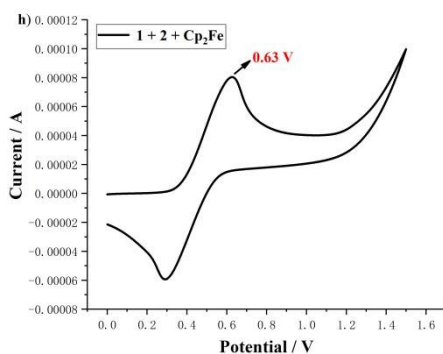

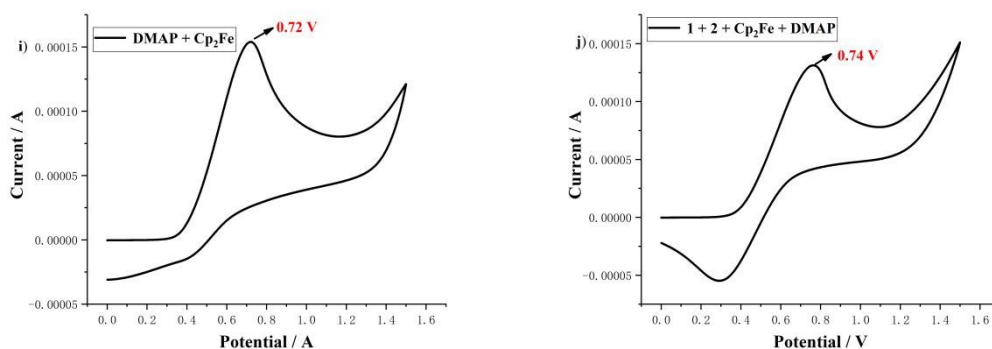

**Figure S5 Cyclic voltammetry experiments of substrates**

100 mVs-1: a) blank; b) 1-(1*H*-indol-1-yl)-2-methylprop-2-en-1-one **1** (0.3 mmol, 55.5 mg); c) diethyl 2-(3-methylbut-2-en-1-yl)malonate **2** (0.75 mmol, 171.1 mg); d) Cp<sub>2</sub>Fe (0.15 mmol, 27.9 mg); e) DMAP (0.3 mmol, 36.6 mg); f) 1-(1*H*-indol-1-yl)-2-methylprop-2-en-1-one **1** (0.3 mmol, 55.5 mg) and Cp<sub>2</sub>Fe (0.15 mmol, 27.9 mg); g) diethyl 2-(3-methylbut-2-en-1-yl)malonate **2** (0.75 mmol, 171.1 mg) and Cp<sub>2</sub>Fe (0.15 mmol, 27.9 mg); h) 1-(1*H*-indol-1-yl)-2-methylprop-2-en-1-one **1** (0.3 mmol, 55.5 mg), diethyl 2-(3-methylbut-2-en-1-yl)malonate **2** (0.75 mmol, 171.1 mg) and Cp<sub>2</sub>Fe (0.15 mmol, 27.9 mg); i) DMAP (0.3 mmol, 36.6 mg) and Cp<sub>2</sub>Fe (0.15 mmol, 27.9 mg); j) 1-(1*H*-indol-1-yl)-2-methylprop-2-en-1-one **1** (0.3 mmol, 55.5 mg), diethyl 2-(3-methylbut-2-en-1-yl)malonate **2** (0.75 mmol, 171.1 mg), Cp<sub>2</sub>Fe (0.15 mmol, 27.9 mg) and DMAP (0.3 mmol, 36.6 mg).

## 7. Synthesis of Substrates

### 7.1 General procedure for the synthesis of N-methacryloylindole S-1.<sup>1</sup>

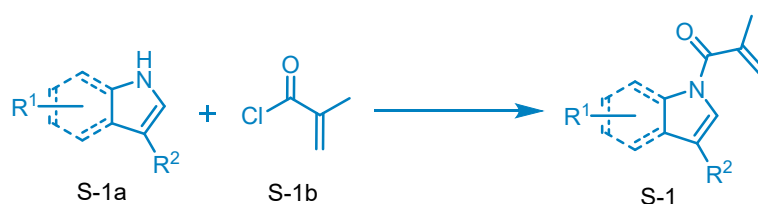

Commercial starting material indole **S-1a** (10 mmol, 1 eq), DMAP (1 mmol, 122.2

mg), Et<sub>3</sub>N (20 mmol, 2023.8 mg) and DCM (10 mL) were added in a 250 mL round bottom flask. The reaction mixture was stirred under 0 °C for 0.5 h, then slowly added methacryloyl chloride **S-1b** (15 mmol, 1567.5 mg). Upon completion of the reaction by TLC, the mixture was warmed to room temperature. The reaction solution was diluted with ethyl acetate (300 mL) and washed with saturated NaCl aqueous solution (300 mL) and H<sub>2</sub>O (300 mL). The separated organic layer was dried with anhydrous Na<sub>2</sub>SO<sub>4</sub> and filtered. The filtrate was concentrated under reduced pressure to give the crude product, which was purified by column chromatographic separation (petroleum ether/ethyl acetate: 100:1) to obtain the desired product **S-1**.

## 7.2 General procedure for the synthesis of $\alpha$ -allyl activated methylene **S-2**.<sup>2</sup>

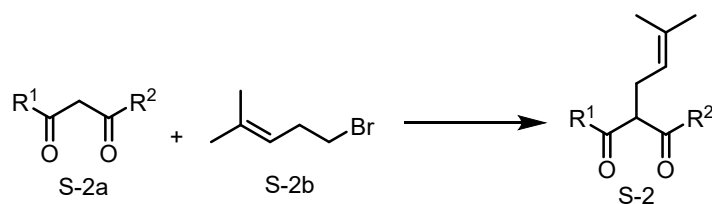

The corresponding activated methylene compound **S-2a** (10 mmol), NaH (11 mmol, 264.0 mg) were dissolved in dry THF (30 mL). The reaction mixture was stirred under 0 °C for 1 h, then **S-2b** (11 mmol, 1639.0 mg) was added slowly. The mixture was warmed up to room temperature and allowed to stir for 12 - 24 h. Upon completion of the reaction by TLC, the reaction solution was diluted with ethyl acetate (300 mL) and washed with H<sub>2</sub>O (300 mL). The organic phase was concentrated under reduced pressure to give the crude product, which was purified by column chromatographic separation (petroleum ether/ethyl acetate: 400:1) to give the desired product **S-2**.

## 8. Characterization data for electrolysis products

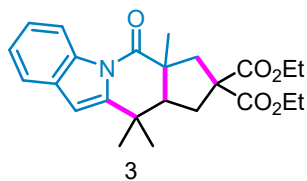

Diethyl 3a,11,11-trimethyl-4-oxo-3a,4,11,11a-tetrahydro-1*H*-cyclopenta-[4,5]-pyrido [1,2-*a*]indole-2,2(3*H*)-dicarboxylate (**3**):

Yellow oil; Eluent:petroluem ether/ethyl acetate 200:1; *dr* = 1.2:1, 90.0 mg, 73%; <sup>1</sup>H NMR (400 MHz, Chloroform-*d*) δ 8.43 (d, *J* = 7.9 Hz, 1H, two isomers), 7.47 (d, *J* = 7.7 Hz, 1H, two isomers), 7.30 - 7.21 (m, 2H, two isomers), 6.45 (s, 0.45H, one isomer), 6.39 (s, 0.55H, one isomer), 4.29 - 4.17 (m, 3H, two isomers), 4.03 - 3.94 (m, 1H, two isomers), 2.99 - 2.96 (m, 0.55H, one isomers), 2.75 - 2.71 (m, 0.45H, one isomer), 2.65 - 2.44 (m, 2.55H, two isomers), 2.38 - 2.32 (m, 0.45H, two isomers), 2.23 - 2.18 (m, 0.55H, one isomer), 2.01 - 1.94 (m, 0.45H, one isomer), 1.45 - 1.41 (m, 6.45H, two isomers), 1.30 - 1.23 (m, 6.90H, two isomers), 1.08 (t, *J* = 7.1 Hz, 1.65H, two isomers); <sup>13</sup>C NMR (101 MHz, CDCl<sub>3</sub>) δ 174.96 & 174.19 (two isomers), 172.20 & 172.15 (two isomers), 172.05 & 170.86 (two isomers), 148.95 & 145.59 (two isomers), 135.68 & 134.65 (two isomers), 130.60 & 130.15 (two isomers), 124.27 & 124.25 (two isomers), 123.91 & 123.73 (two isomers), 119.92 & 119.89 (two isomers), 116.32 & 116.21 (two isomers), 104.75 (overlap, two isomers), 61.90 & 61.88 (two isomers), 61.81 & 61.71 (two isomers), 57.3 & 56.65 (two isomers), 54.13 (overlap, two isomers), 51.07 & 50.56 (two isomers), 49.88 & 48.23 (two isomers), 42.46 & 38.79 (two isomers), 34.34 & 34.09 (two isomers), 32.63 & 31.54 (two isomers), 27.51 & 26.82 (two isomers), 25.72 & 20.72 (two isomers), 14.09 & 14.05 (two isomers), 13.84 (overlap, two isomers); HRMS (ESI-TOF) Calcd for C<sub>24</sub>H<sub>30</sub>NO<sub>5</sub> [M+H]<sup>+</sup>: 412.2118; found: 412.2123.

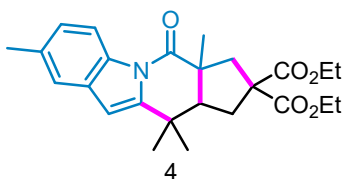

Diethyl 3a,8,11,11-tetramethyl-4-oxo-3a,4,11,11a-tetrahydro-1*H*-cyclopenta-[4,5]-pyrido[1,2-*a*]indole-2,2(3*H*)-dicarboxylate (**4**):

Yellow oil; Eluent:petroluem ether/ethyl acetate 200:1;  $dr = 4.0:1$ , 93.1 mg, 73%;  $^1\text{H}$  NMR (400 MHz, Chloroform- $d$ )  $\delta$  8.28 (d,  $J = 8.3$  Hz, 1H, two isomers), 7.26 (s, 1H, two isomers), 7.10 (d,  $J = 8.3$  Hz, 1H, two isomers), 6.38 (s, 0.20H, one isomer), 6.32 (s, 0.80H, one isomer), 4.27 - 4.24 (m, 2.50H, two isomers ), 4.22 - 4.17 (m, 1.50H, two isomers), 2.98 - 2.95 (m, 0.80H, one isomer), 2.73 - 2.70 (m, 0.20H, one isomer), 2.63 - 2.49 (m, 2.20H, two isomers), 2.42 (s, 3H, two isomers), 2.37 - 2.31 (m, 0.20H, one isomer), 2.22 - 2.17 (m, 0.80H, one isomer), 2.00 - 1.93 (m, 0.80H, one isomer), 1.45 - 1.40 (m, 7H, two isomers), 1.30 - 1.23 (m, 5.2H, two isomers), 1.10 (t,  $J = 7.1$  Hz, 2.8H, two isomers);  $^{13}\text{C}$  NMR (101 MHz,  $\text{CDCl}_3$ )  $\delta$  174.80 & 173.95 (two isomers), 172.23 & 172.18 (two isomers), 172.11 & 170.85 (two isomers), 149.00 & 145.64 (two isomers), 133.84 & 133.45 (two isomers), 133.27 & 132.79 (two isomers), 130.82 & 130.38 (two isomers), 125.47 & 125.44 (two isomers), 119.95 & 119.87 (two isomers), 115.95 & 115.83 (two isomers), 104.54 & 104.50 (two isomers), 61.89 & 61.86 (two isomers), 61.79 & 61.70 (two isomers), 57.37 & 56.67 (two isomers), 54.16 (overlap, two isomers), 51.08 & 50.45 (two isomers), 49.80 & 48.18 (two isomers), 42.46 & 38.78 (two isomers), 34.32 & 34.09 (two isomers), 32.63 & 31.54 (two isomers), 27.51 (overlap, two isomers), 26.83 & 25.69 (two isomers), 21.44 & 20.71 (two isomers), 14.08 & 14.04 (two isomers), 13.86 (overlap, two isomers); HRMS (ESI-TOF) Calcd for  $\text{C}_{25}\text{H}_{32}\text{NO}_5$   $[\text{M}+\text{H}]^+$ : 426.2278; found: 426.2274.

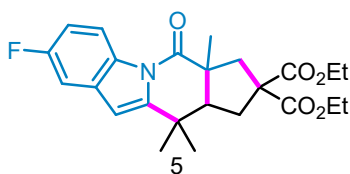

Diethyl 8-fluoro-3a,11,11-trimethyl-4-oxo-3a,4,11,11a-tetrahydro-1H-cyclopenta-[4,5]-pyrido[1,2-*a*]indole-2,2(3*H*)-dicarboxylate (**5**):

Yellow oil; Eluent:petroluem ether/ethyl acetate 200:1;  $dr = 1.5:1$ , 90.1 mg, 70%;  $^1\text{H}$  NMR (400 MHz, Chloroform- $d$ )  $\delta$  8.35 (dd,  $J = 9.0, 4.8$  Hz, 1H, two isomers), 7.11 (dd,  $J = 8.8, 2.2$  Hz, 1H, two isomers), 6.98 (tt,  $J = 9.1, 2.8$  Hz, 1H, two isomers), 6.41 (s, 0.40H, one isomer), 6.35 (s, 0.60H, one isomer), 4.29 - 4.17 (m, 3H, two isomers),

4.03 - 3.95 (m, 1H, two isomers), 2.99 - 2.96 (m, 0.60H, one isomer), 2.72 - 2.69 (m, 0.40H, one isomer), 2.63 - 2.43 (m, 2.60H, two isomers), 2.37 - 2.31 (m, 0.40H, two isomers), 2.22 - 2.17 (m, 0.60H, one isomer), 2.01 - 1.95 (m, 0.40H, one isomer), 1.45 - 1.42 (m, 6.4H, two isomers), 1.30 - 1.23 (m, 6.8H, two isomers), 1.09 (t,  $J = 7.1$  Hz, 1.8H, two isomers);  $^{13}\text{C}$  NMR (101 MHz,  $\text{CDCl}_3$ )  $\delta$  174.71 & 173.91 (two isomers), 172.16 & 172.09 (two isomers), 172.00 & 170.91 (two isomers), 161.06 (d,  $J = 16.1$  Hz) & 158.68 (d,  $J = 16.0$  Hz) (two isomers), 150.65 & 147.37 (two isomers), 131.97 & 130.97 (two isomers), 131.60 (d,  $J = 10.1$  Hz) & 131.27 (d,  $J = 10.1$  Hz) (two isomers), 117.22 (t,  $J = 9.7$  Hz, two isomers), 111.77 (d,  $J = 9.6$  Hz) & 111.53 (d,  $J = 9.5$  Hz) (two isomers), 105.71 (d,  $J = 15.2$  Hz) & 105.48 (d,  $J = 15.0$  Hz) (two isomers), 104.42 (dd,  $J = 3.6, 1.8$  Hz) (two isomers), 61.93 & 61.90 (two isomers), 61.83 & 61.74 (two isomers), 57.25 & 56.62 (two isomers), 54.13 & 51.01 (two isomers), 50.54 & 49.72 (two isomers), 48.19 & 42.43 (two isomers), 38.75 & 34.42 (two isomers), 34.22 & 33.92 (two isomers), 32.56 & 31.49 (two isomers), 27.40 & 26.84 (two isomers), 25.60 & 20.73 (two isomers), 14.05 & 14.00 (overlap, two isomers), 13.81 (overlap, two isomers);  $^{19}\text{F}$  NMR (376 MHz,  $\text{CDCl}_3$ )  $\delta$  -119.17, -119.33; HRMS (ESI-TOF) Calcd for  $\text{C}_{24}\text{H}_{29}\text{NO}_5\text{F}$   $[\text{M}+\text{H}]^+$ : 430.2000; found: 430.2026.

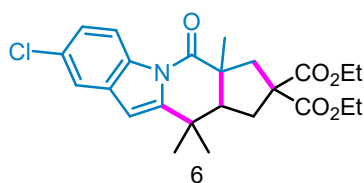

Diethyl 8-chloro-3a,11,11-trimethyl-4-oxo-3a,4,11,11a-tetrahydro-1H-cyclopenta-[4,5]-pyrido[1,2-a]indole-2,2(3H)-dicarboxylate (**6**):

Yellow oil; Eluent: petroleum ether/ethyl acetate 200:1;  $dr = 1.0:1$ , 97.5 mg, 73%;  $^1\text{H}$  NMR (400 MHz, Chloroform- $d$ )  $\delta$  8.31 (d,  $J = 8.7$  Hz, 1H, two isomers), 7.41 (s, 1H, two isomers), 7.21 (dd,  $J = 8.7, 2.0$  Hz, 1H, two isomers), 6.38 (s, 0.50H, one isomer), 6.32 (s, 0.50H, one isomer), 4.26 - 4.16 (m, 3.20H, two isomers), 4.02 - 3.96 (m, 0.80H, two isomers), 2.97 - 2.94 (m, 0.50H, one isomer), 2.71 - 2.68 (m, 0.50H, one isomer), 2.62 - 2.42 (m, 2.50H, two isomers), 2.36 - 2.30 (m, 0.50H, two isomers), 2.21 - 2.16

(m, 0.50H, two isomers), 1.99 - 1.91 (m, 0.50H, two isomers), 1.44 - 1.40 (m, 6H, two isomers), 1.31 - 1.22 (m, 7.50H, two isomers), 1.08 (t,  $J = 7.1$  Hz, 1.50H, two isomers);  $^{13}\text{C}$  NMR (101 MHz,  $\text{CDCl}_3$ )  $\delta$  174.74 & 174.01 (two isomers), 172.11 & 172.04 (two isomers), 171.93 & 170.87 (two isomers), 150.41 & 147.14 (two isomers), 133.96 & 132.94 (two isomers), 131.83 & 131.45 (two isomers), 129.39 & 129.18 (two isomers), 124.23 (overlap, two isomers), 119.56 & 119.48 (two isomers), 117.24 & 117.14 (two isomers), 104.00 & 103.97 (two isomers), 61.91 & 61.89 (two isomers), 61.82 & 61.73 (two isomers), 57.21 & 56.58 (two isomers), 54.08 & 50.95 (two isomers), 50.60 & 49.76 (two isomers), 48.19 & 42.3 (two isomers), 38.72 & 34.42 (two isomers), 34.19 & 33.91 (two isomers), 32.49 & 31.46 (two isomers), 27.36 & 26.79 (two isomers), 25.59 & 20.68 (two isomers), 14.05 & 14.00 (two isomers), 13.82 (overlap, two isomers); HRMS (ESI-TOF) Calcd for  $\text{C}_{24}\text{H}_{29}\text{NO}_5\text{Cl}$   $[\text{M}+\text{H}]^+$ : 446.1729; found: 446.1730.

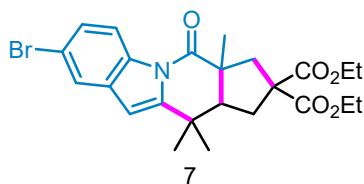

Diethyl 8-bromo-3a,11,11-trimethyl-4-oxo-3a,4,11,11a-tetrahydro-1H-cyclopenta-[4,5]-pyrido[1,2-a]indole-2,2(3H)-dicarboxylate (**7**):

Yellow oil; Eluent:petroluem ether/ethyl acetate 200:1;  $dr = 1.0:1$ , 104.4 mg, 71%;  $^1\text{H}$  NMR (400 MHz, Chloroform- $d$ )  $\delta$  8.28 (d,  $J = 8.7$  Hz, 1H, two isomers), 7.59 (d,  $J = 1.7$  Hz, 1H, two isomers), 7.37 (dd,  $J = 8.7, 1.9$  Hz, 1H, two isomers), 6.39 (s, 0.50H, one isomer), 6.33 (s, 0.50H, one isomer), 4.28 - 4.16 (m, 3.20H, two isomers), 4.05 - 3.93 (m, 0.86H, two isomers), 2.97 (d,  $J = 14.6$  Hz, 0.50H, one isomer), 2.73 - 2.69 (m, 0.50H, one isomer), 2.63 - 2.43 (m, 2.50H, two isomers), 2.38 - 2.31 (m, 0.50H, two isomers), 2.20 (m, 0.50H, one isomer), 2.07 - 1.90 (m, 0.5H, one isomer), 1.48 - 1.39 (m, 6H, two isomers), 1.33 - 1.21 (m, 7.50H, two isomers), 1.10 (t,  $J = 7.1$  Hz, 1.50H, two isomers);  $^{13}\text{C}$  NMR (101 MHz,  $\text{CDCl}_3$ )  $\delta$  174.79 & 174.07 (two isomers), 172.13 & 172.07 (two isomers), 171.96 & 170.88 (two isomers), 150.29 & 147.02 (two

isomers), 134.33 & 133.31 (two isomers), 132.34 & 131.95 (two isomers), 126.99 & 126.97 (two isomers), 122.61 & 122.55 (two isomers), 117.66 & 117.22 (two isomers), 117.22 & 117.00 (two isomers), 103.89 & 103.86 (two isomers), 61.95 & 61.92 (two isomers), 61.85 & 61.77 (two isomers), 57.22 & 56.59 (two isomers), 54.10 (overlap, two isomers), 50.96 & 49.80 (two isomers), 42.36 & 38.73 (two isomers), 34.42 & 34.19 (two isomers), 33.95 & 32.52 (two isomers), 30.33 & 27.38 (two isomers), 26.82 & 25.63 (two isomers), 20.68 (overlap, two isomers), 14.07 & 14.02 (two isomers), 13.84 (overlap, two isomers); HRMS (ESI-TOF) Calcd for  $C_{24}H_{29}NO_5Br$   $[M+H]^+$ : 490.1224; found: 490.1218.

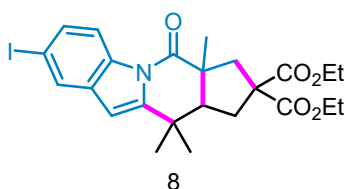

Diethyl 8-iodo-3a,11,11-trimethyl-4-oxo-3a,4,11,11a-tetrahydro-1H-cyclopenta-[4,5]-pyrido[1,2-a]indole-2,2(3H)-dicarboxylate (**8**):

Yellow oil; Eluent:petroluem ether/ethyl acetate 200:1;  $dr = 1.0:1$ , 111.2 mg, 69%;  $^1H$  NMR (400 MHz, Chloroform- $d$ )  $\delta$  8.42 (d,  $J = 7.9$  Hz, 0.30H, one isomer ), 8.17 (d,  $J = 8.6$  Hz, 0.70H, one isomer), 7.81 (d,  $J = 1.5$  Hz, 0.60H, one isomer), 7.57 (d,  $J = 1.6$  Hz, 0.70H, one isomer), 7.47 (d,  $J = 7.6$  Hz, 0.30H, one isomer), 7.31 - 7.22 (m, 0.40H, one isomer), 6.46 (s, 0.15H), 6.39 (s, 0.15H), 6.37 (s, 0.35H), 6.31 (s, 0.35H), 4.30 - 4.17 (m, 3.20H, two isomers), 4.04 - 3.95 (m, 0.80H, two isomers), 2.99 - 2.90 (m, 0.50H, one isomer), 2.74 - 2.69 (m, 0.50H, one isomer), 2.64 - 2.43 (m, 2.50H, two isomers), 2.38 - 2.31 (m, 0.50H, two isomers), 2.23 - 2.18 (m, 0.50H, one isomer), 2.00 - 1.93 (m, 0.50H, one isomer), 1.46 - 1.41 (m, 6H, two isomers), 1.30 - 1.24 (m, 7.50H, two isomers), 1.09 (td,  $J = 7.1, 3.0$  Hz, 1.50H, two isomers);  $^{13}C$  NMR (101 MHz,  $CDCl_3$ )  $\delta$  174.84 & 174.13 (two isomers), 172.15 & 172.08 (two isomers), 171.98 & 170.88 (two isomers), 150.71 & 147.36 (two isomers), 133.88 & 132.89 (two isomers), 132.76 & 132.71 (two isomers), 128.78 & 128.74 (two isomers), 124.25 & 123.90 (two isomers), 118.09 & 117.98 (two isomers), 116.33 & 116.23 (two isomers), 104.73 &

103.60 (two isomers), 88.13 & 86.82 (two isomers), 61.95 & 61.91 (two isomers), 61.84 & 61.78 (two isomers), 57.23 & 56.60 (two isomers), 54.10 & 50.96 (two isomers), 50.67 & 49.84 (two isomers), 48.19 & 42.34 (two isomers), 38.35 & 34.38 (two isomers), 32.52 & 31.47 (two isomers), 27.37 & 26.81 (two isomers), 25.64 & 20.66 (two isomers), 14.06 & 14.01 (two isomers), 13.83 (overlap, two isomers); HRMS (ESI-TOF) Calcd for C<sub>24</sub>H<sub>29</sub>NO<sub>5</sub>I [M+H]<sup>+</sup>: 538.1085; found: 538.1090.

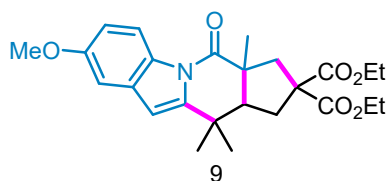

Diethyl 8-methoxy-3a,11,11-trimethyl-4-oxo-3a,4,11,11a-tetrahydro-1H-cyclopenta-[4,5]-pyrido[1,2-a]indole-2,2(3H)-dicarboxylate (**9**):

Yellow oil; Eluent:petroluem ether/ethyl acetate 200:1; *dr* = 1.9:1, 97.9 mg, 74%; <sup>1</sup>H NMR (400 MHz, Chloroform-*d*) δ 8.31 (dd, *J* = 8.9, 2.4 Hz, 1H, two isomers), 6.96 - 6.94 (m, 1H, two isomers), 6.90 - 6.86 (m, 1H, two isomers), 6.38 (s, 0.35H, one isomer), 6.32 (s, 0.65H, one isomer), 4.30 - 4.17 (m, 3H, two isomers ), 4.04 - 3.94 (m, 1H, two isomers), 3.83 (s, 3H, two isomers), 3.01 - 2.97 (m, 0.65H, two isomers), 2.73 - 2.69 (m, 0.35H, two isomers), 2.64 - 2.43 (m, 2.65H, two isomers), 2.38 - 2.31 (m, 0.35H, two isomers), 2.21 - 2.16 (m, 0.65H, two isomers), 2.03 - 1.97 (m, 0.35H, two isomers), 1.44 - 1.40 (m, 6.35H, two isomers), 1.30 - 1.23 (m, 6.35H, two isomers), 1.09 (t, *J* = 7.1 Hz, 2.30H, two isomers); <sup>13</sup>C NMR (101 MHz, CDCl<sub>3</sub>) δ 174.57 & 173.63 (two isomers), 172.17 & 172.11 (two isomers), 172.04 & 170.88 (two isomers), 156.73 & 156.57 (two isomers), 149.64 & 146.37 (two isomers), 131.58 & 131.21 (two isomers), 130.28 & 129.26 (two isomers), 117.02 & 116.91 (two isomers), 112.26 & 112.01 (two isomers), 104.66 & 104.60 (two isomers), 103.28 & 103.00 (two isomers), 61.86 & 61.84 (two isomers), 61.7 & 61.67 (two isomers), 57.27 & 56.63 (two isomers), 55.64 & 55.62 (two isomers), 54.14 & 51.09 (two isomers), 50.42 & 49.68 (two isomers), 48.16 & 42.49 (two isomers), 38.74 & 34.32 (two isomers), 34.12 & 33.92 (two isomers), 32.60 & 31.50 (two isomers), 27.45 & 26.86 (two isomers), 25.60 &

20.76 (two isomers), 14.06 & 14.02 (two isomers), 13.83 (overlap, two isomers); HRMS (ESI-TOF) Calcd for C<sub>25</sub>H<sub>32</sub>NO<sub>6</sub> [M+H]<sup>+</sup>: 442.2224; found: 442.2229.

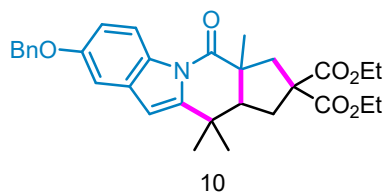

Diethyl 8-(benzyloxy)-3a,11,11-trimethyl-4-oxo-3a,4,11,11a-tetrahydro-1H-cyclopenta-[4,5]-pyrido[1,2-a]indole-2,2(3H)-dicarboxylate (**10**):

Yellow oil; Eluent:petroluem ether/ethyl acetate 200:1; *dr* = 3.0:1, 111.6 mg, 72%; <sup>1</sup>H NMR (400 MHz, Chloroform-*d*) δ 8.31 (d, *J* = 8.9 Hz, 1H, two isomers), 7.47 - 7.45 (m, 2H, two isomers), 7.40 - 7.37 (m, 2H, two isomers), 7.33 -7.30 (m, 1H, two isomers), 7.02 - 7.01 (m, 1H, two isomers), 6.98 - 6.94 (m, 1H, two isomers), 6.37 (s, 0.25H, one isomer), 6.31 (s, 0.75H, one isomer), δ 5.11 (s, 2H, two isomers), 4.28 - 4.17 (m, 3H, two isomers), 4.04 - 3.95 (m, 1H, two isomers), 3.00 - 2.96 (m, 0.75H, one isomer), 2.72 - 2.68 (m, 0.25H, one isomer), 2.63 - 2.42 (m, 2.25H, two isomers), 2.37 - 2.30 (m, 0.25H, one isomer), 2.21 - 2.16 (m, 0.75H, one isomer), 2.04 - 1.95 (m, 0.75H, two isomers), 1.44 - 1.41(m, 6H, two isomers), 1.30 -1.23 (m, 6.75H, two isomers), 1.10 (t, *J* = 7.1 Hz, 2.25H, two isomers); <sup>13</sup>C NMR (101 MHz, CDCl<sub>3</sub>) δ 174.61 & 173.69 (two isomers), 172.21 & 172.15 (two isomers), 172.10 & 170.92 (two isomers), 155.91 & 155.75 (two isomers), 149.70 & 146.41 (two isomers), 137.34 (overlap, two isomers), 131.58 & 131.21 (two isomers), 130.49 & 129.48 (two isomers), 128.58 & 127.88 (two isomers), 127.46 (overlap, two isomers), 117.10 & 116.99 (two isomers), 113.15 & 112.92 (two isomers), 104.72 & 104.68 (two isomers), 104.66 & 104.43 (two isomers), 70.54 & 70.53 (two isomers), 61.90 & 61.88 (two isomers), 61.81 & 61.72 (two isomers), 57.31 & 56.66 (two isomers), 54.18 & 51.11 (two isomers), 50.46 & 49.71 (two isomers), 48.19 & 42.52 (two isomers), 38.78 & 34.35 (two isomers), 34.15 & 33.94 (two isomers), 32.63 & 31.53 (two isomers), 27.48 & 26.89 (two isomers), 25.64 & 20.79 (two isomers), 14.25 & 14.10 (two isomers),

14.05 & 13.87 (two isomers); HRMS (ESI-TOF) Calcd for  $C_{31}H_{36}NO_6$   $[M+H]^+$ : 518.2544; found: 518.2549.

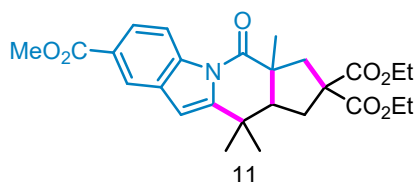

2,2-Diethyl 8-methyl 3a,11,11-trimethyl-4-oxo-3a,4,11,11a-tetrahydro-1*H*-cyclopenta-[4,5]-pyrido[1,2-*a*]indole-2,2,8(3*H*)-tricarboxylate (**11**):

Yellow oil; Eluent:petroluem ether/ethyl acetate 200:1; *dr* = 1.0:1, 94.3 mg, 67%; <sup>1</sup>H NMR (400 MHz, Chloroform-*d*)  $\delta$  8.45 - 8.30 (m, 1H, two isomers), 8.13 (s, 1H, two isomers), 7.93 - 7.91 (m, 1H, two isomers), 6.45 (s, 0.50H, one isomer), 6.38 (s, 0.50H, one isomer), 4.22 - 4.11 (m, 3H, two isomers), 3.96 - 3.89 (m, 1H, two isomers), 3.87 - 3.87 (m, 3H, two isomers), 2.91 - 2.88 (m, 0.50H, one isomer), 2.67 - 2.64 (m, 0.50H, one isomer), 2.57 - 2.38 (m, 2.50H, two isomers), 2.302 - 2.25 (m, 0.50H, two isomers), 2.18 - 2.13 (m, 0.50H, one isomer), 1.94 - 1.87 (m, 0.50H, one isomer), 1.41 - 1.36 (m, 6H, two isomers), 1.23 - 1.17 (m, 7.50H, two isomers), 1.01 (t, *J* = 7.1 Hz, 1.50H, two isomers); <sup>13</sup>C NMR (101 MHz, CDCl<sub>3</sub>)  $\delta$  173.93 & 173.34 (two isomers), 171.09 & 171.04 (two isomers), 170.91 (overlap, two isomers), 169.84 & 166.45 (two isomers), 149.33 & 146.00 (two isomers), 137.28 & 136.26 (two isomers), 129.33 & 128.92 (two isomers), 124.73 & 124.68 (two isomers), 124.60 & 124.51 (two isomers), 121.00 & 120.99 (two isomers), 114.85 & 114.77 (two isomers), 103.92 & 103.87 (two isomers), 60.93 & 60.90 (two isomers), 60.83 & 60.75 (two isomers), 56.25 & 55.55 (two isomers), 53.02 & 51.04 (two isomers), 49.89 & 49.69 (two isomers), 48.87 & 47.23 (two isomers), 41.32 & 37.72 (two isomers), 33.45 & 33.18 (two isomers), 32.99 & 31.48 (two isomers), 30.45 (overlap, two isomers), 26.39 & 25.74 (two isomers), 19.64 (overlap, two isomers), 13.03 & 12.98 (two isomers), 12.79 (overlap, two isomers); HRMS (ESI-TOF) Calcd for  $C_{26}H_{32}NO_7$   $[M+H]^+$ : 470.2173; found: 470.2179.

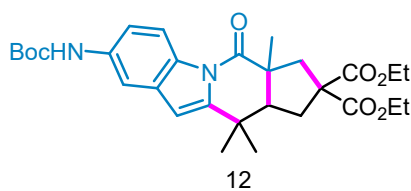

Diethyl 8-((*tert*-butoxycarbonyl)amino)-3a,11,11-trimethyl-4-oxo-3a,4,11,11a-tetrahydro-1*H*-cyclopenta[4,5]pyrido[1,2-*a*]indole-2,2(3*H*)-dicarboxylate (**12**):

Yellow oil; Eluent:petroluem ether/ethyl acetate 200:1; *dr* = 1.5:1, 110.1 mg, 66%; <sup>1</sup>H NMR (400 MHz, Chloroform-*d*) δ 8.21 (dd, *J* = 8.8, 2.6 Hz, 0.88H, two isomers), 7.60 (s, 0.83H, two isomers), 7.46 (d, *J* = 8.7 Hz, 0.17H, two isomers), 7.28 (t, *J* = 2.1 Hz, 0.12H, two isomers), 7.05 (dd, *J* = 8.6, 2.5 Hz, 0.15H, two isomers), 7.01 - 6.98 (m, 0.85H, two isomers), 6.53 (s, 1H), 6.30 (s, 0.40H, one isomer), 6.24 (s, 0.60H, one isomer), 4.22 - 4.10 (m, 3H, two isomers), 3.97 - 3.87 (m, 1H, two isomers), 2.92 - 2.89 (m, 0.60H, one isomer), 2.65 - 2.61 (m, 0.40H, one isomer), 2.55 - 2.35 (m, 2.60H, two isomers), 2.29 - 2.23 (m, 0.40H, two isomers), 2.13 - 2.09 (m, 0.40H, one isomer), 1.93 - 1.86 (m, 0.60H, one isomer), 1.45 (s, 8H, two isomers), 1.37 - 1.33 (m, 6H, two isomers), 1.26 (s, 1.20H, two isomers), 1.23 - 1.17 (m, 6.80H, two isomers), 1.02 (t, *J* = 7.1 Hz, 2H, two isomers); <sup>13</sup>C NMR (101 MHz, CDCl<sub>3</sub>) δ 173.67 & 172.78 (two isomers), 171.17 & 171.12 (two isomers), 171.07 & 169.87 (two isomers), 152.02 & 148.63 (two isomers), 145.31 (overlap, two isomers), 133.59 & 133.41 (two isomers), 130.77 & 130.21 (two isomers), 129.80 & 129.77 (two isomers), 123.44 & 122.95 (two isomers), 115.47 & 115.34 (two isomers), 114.76 & 108.81 (two isomers), 103.80 & 103.77 (two isomers), 79.28 (overlap, two isomers), 60.86 & 60.84 (two isomers), 60.76 & 60.68 (two isomers), 56.26 & 55.62 (two isomers), 53.13 (overlap, two isomers), 50.03 & 49.44 (two isomers), 48.69 & 47.15 (two isomers), 41.43 & 37.74 (two isomers), 33.31 & 33.08 (two isomers), 32.91 & 31.54 (two isomers), 30.48 & 30.41 (two isomers), 29.17 & 28.67 (two isomers), 27.37 & 26.42 (two isomers), 25.82 & 24.59 (two isomers), 19.71 (overlap, two isomers), 13.03 & 12.98 (two isomers), 12.80 (overlap, two isomers); HRMS (ESI-TOF) Calcd for C<sub>29</sub>H<sub>39</sub>N<sub>2</sub>O<sub>7</sub> [M+H]<sup>+</sup>: 527.2798; found: 527.2773.

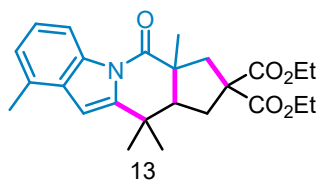

Diethyl 3a,9,11,11-tetramethyl-4-oxo-3a,4,11,11a-tetrahydro-1*H*-cyclopenta-[4,5]-pyrido[1,2-*a*]indole-2,2(3*H*)-dicarboxylate (**13**):

Yellow oil; Eluent:petroluem ether/ethyl acetate 200:1; *dr* = 1.0:1, 94.4 mg, 74%; <sup>1</sup>H NMR (400 MHz, Chloroform-*d*) δ 8.25 (d, *J* = 8.2 Hz, 1H, two isomers), 7.21 - 7.17 (m, 1H, two isomers), 7.06 - 7.04 (m, 1H, two isomers), 6.48 (s, 0.50H, one isomer), 6.42 (s, 0.50H, one isomer), 4.29 - 4.18 (m, 3H, two isomers), 4.04 - 3.95 (m, 1H, two isomers), 2.96 - 2.94 (m, 0.50H, one isomer), 2.74 - 2.70 (m, 0.50H, one isomer), 2.64 - 2.55 (m, 2H, two isomers), 2.50 (s, 3H, two isomers), 2.45 - 2.44 (m, 0.50H, one isomer), 2.38 - 2.32 (m, 0.50H, one isomer), 2.23 - 2.18 (m, 0.50H, one isomer), 1.99 - 1.92 (m, 0.50H, one isomer), 1.48 - 1.41 (m, 6H, two isomers), 1.30 - 1.24 (m, 7.50H, two isomers), 1.10 (t, *J* = 7.1 Hz, 1.50H, two isomers); <sup>13</sup>C NMR (101 MHz, CDCl<sub>3</sub>) δ 175.00 & 174.23 (two isomers), 172.23 & 172.18 (two isomers), 172.09 & 170.83 (two isomers), 148.35 & 144.96 (two isomers), 135.43 & 134.37 (two isomers), 130.06 & 129.57 (two isomers), 129.24 & 129.18 (two isomers), 124.38 & 124.36 (two isomers), 124.16 (overlap, two isomers), 113.83 & 113.73 (two isomers), 103.13 (overlap, two isomers), 61.90 & 61.87 (two isomers), 61.79 & 61.70 (two isomers), 57.44 & 56.68 (two isomers), 54.14 & 51.07 (two isomers), 50.52 & 49.90 (two isomers), 48.22 & 42.44 (two isomers), 38.80 & 34.35 (two isomers), 34.21 & 34.11 (two isomers), 32.71 & 31.56 (two isomers), 27.53 & 26.82 (two isomers), 25.80 & 20.66 (two isomers), 18.46 (overlap, two isomers), 14.07 & 14.02 (two isomers), 13.84 (overlap, two isomers); HRMS (ESI-TOF) Calcd for C<sub>25</sub>H<sub>32</sub>NO<sub>5</sub> [M+H]<sup>+</sup>: 426.2278; found: 426.2274.

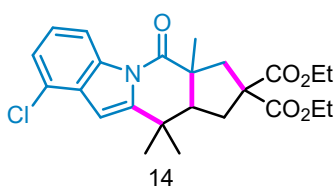

Diethyl 9-chloro-3a,11,11-trimethyl-4-oxo-3a,4,11,11a-tetrahydro-1*H*-cyclopenta-[4,5]-pyrido[1,2-*a*]indole-2,2(3*H*)-dicarboxylate (**14**):

Yellow oil; Eluent:petroluem ether/ethyl acetate 200:1; *dr* = 1.5:1, 96.1 mg, 72%; <sup>1</sup>H NMR (400 MHz, Chloroform-*d*) δ 8.31 (d, *J* = 7.8 Hz, 0.90H, two isomers), 7.64 (d, *J* = 12.3 Hz, 0.10H, two isomers), 7.26 - 7.18 (m, 2H, two isomers), 6.58 (s, 0.60H, one isomer), 6.52 (s, 0.40H, one isomer), 4.33 - 4.19 (m, 3.20H, two isomers), 4.04 - 3.94 (m, 0.80H, two isomers), 2.98 - 2.94 (m, 0.40H, one isomer), 2.74 - 2.70 (m, 0.60H, one isomer), 2.63 - 2.51(m, 2H, two isomers), 2.49 - 2.44 (m, 0.60H, one isomer), 2.38 - 2.32 (m, 0.40H, one isomer), 2.25 - 2.20 (m, 0.40H, one isomer), 1.96 - 1.93 (m, 0.60H, one isomer), 1.49 - 1.47 (m, 4.50H, two isomers), 1.43 - 1.41 (m, 1.50H, two isomers), 1.32 - 1.24 (m, 7.80H, two isomers), 1.09 (t, *J* = 7.1 Hz, 1.20H, two isomers); <sup>13</sup>C NMR (101 MHz, CDCl<sub>3</sub>) δ 174.96 & 174.31 (two isomers), 172.15 & 172.09 (two isomers), 171.97 & 170.86 (two isomers), 151.68 & 150.41 (two isomers), 146.87 & 138.66 (two isomers), 136.29 & 135.28 (two isomers), 130.01 & 128.09 (two isomers), 125.08 & 124.99 (two isomers), 123.70 & 123.48 (two isomers), 114.79 & 114.69 (two isomers), 101.49 (overlap, two isomers), 61.95 & 61.92 (two isomers), 61.85 & 61.76 (two isomers), 57.31 & 56.63 (two isomers), 53.16 & 50.93 (two isomers), 50.70 & 49.90 (two isomers), 48.95 & 41.37 (two isomers), 37.33 & 34.51 (two isomers), 34.26 & 34.05 (two isomers), 32.54 & 31.09 (two isomers), 27.41 & 26.75 (two isomers), 25.66 & 21.34 (two isomers), 14.20 & 14.05 (two isomers), 14.00 & 13.82 (two isomers); HRMS (ESI-TOF) Calcd for C<sub>24</sub>H<sub>29</sub>NO<sub>5</sub>Cl [M+H]<sup>+</sup>: 446.1729; found: 446.1730.

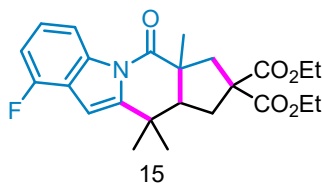

Diethyl 9-fluoro-3a,11,11-trimethyl-4-oxo-3a,4,11,11a-tetrahydro-1*H*-cyclopenta-[4,5]-pyrido[1,2-*a*]indole-2,2(3*H*)-dicarboxylate (**15**):

Yellow oil; Eluent:petroluem ether/ethyl acetate 200:1;  $dr = 1.5:1$ , 86.2 mg, 67%;  $^1\text{H}$  NMR (400 MHz, Chloroform- $d$ )  $\delta$  8.20 (d,  $J = 8.2$  Hz, 1H, two isomers), 7.21 (td,  $J = 8.2, 5.4$  Hz, 1H, two isomers), 7.96 - 6.91 (m, 1H, two isomers), 6.57 (s, 0.60H, one isomer), 6.51 (s, 0.40H, one isomer), 4.30 - 4.18 (m, 3.20H, two isomers), 4.05 - 3.95 (m, 0.80H, two isomers), 2.98 - 2.94 (m, 0.40H, one isomer), 2.74 - 2.71 (m, 0.60H, one isomer), 2.64 - 2.44 (m, 2.60H, two isomers), 2.39 - 2.32 (m, 0.60H, two isomers), 2.25 - 2.20 (m, 0.40H, one isomer), 2.05 - 1.94 (m, 0.40H, one isomer), 1.48 - 1.43 (m, 6H, two isomers), 1.31 - 1.24 (m, 7.80H, two isomers), 1.10 (t,  $J = 7.1$  Hz, 1.20H, two isomers);  $^{13}\text{C}$  NMR (101 MHz,  $\text{CDCl}_3$ )  $\delta$  174.97 & 174.34 (two isomers), 172.15 & 172.09 (two isomers), 171.97 & 170.86 (two isomers), 156.39 (d,  $J = 4.3$  Hz) & 153.93 (d,  $J = 4.3$  Hz) (two isomers), 149.04 & 145.7 (two isomers), 137.72 (d,  $J = 9.5$  Hz) & 136.70 (d,  $J = 9.4$  Hz) (two isomers), 125.03 (dd,  $J = 10.9, 7.2$  Hz) (two isomers), 119.22 (d,  $J = 21.6$  Hz) & 118.70 (d,  $J = 21.7$  Hz) (two isomers), 112.37 (d,  $J = 3.7$  Hz) & 112.26 (d,  $J = 3.7$  Hz) (two isomers), 109.39 (d,  $J = 18.6$  Hz) & 109.09 (d,  $J = 18.6$  Hz) (two isomers), 100.19 & 100.17 (two isomers), 61.95 & 61.92 (two isomers), 61.85 & 61.76 (two isomers), 57.31 & 56.62 (two isomers), 54.07 & 50.97 (two isomers), 50.68 & 49.92 (two isomers), 48.23 & 42.36 (two isomers), 38.76 & 34.4 (two isomers), 34.22 & 34.05 (two isomers), 32.57 & 31.48 (two isomers), 27.44 & 26.75 (two isomers), 25.69 & 20.68 (two isomers), 14.07 & 14.02 (two isomers), 13.83 (overlap, two isomers);  $^{19}\text{F}$  NMR (376 MHz,  $\text{CDCl}_3$ )  $\delta$  -122.97, -123.13; HRMS (ESI-TOF) Calcd for  $\text{C}_{24}\text{H}_{29}\text{NO}_5\text{F}$   $[\text{M}+\text{H}]^+$ : 430.2024; found: 430.2026.

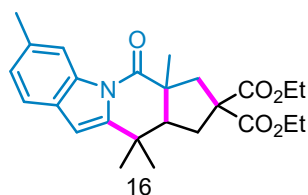

Diethyl 3a,7,11,11-tetramethyl-4-oxo-3a,4,11,11a-tetrahydro-1H-cyclopenta-[4,5]-pyrido[1,2-a]indole-2,2(3H)-dicarboxylate (**16**):

Yellow oil; Eluent:petroluem ether/ethyl acetate 200:1;  $dr = 1.5:1$ , 90.5 mg, 71%;  $^1\text{H}$  NMR (400 MHz, Chloroform- $d$ )  $\delta$  8.27 (d,  $J = 3.3$  Hz, 1H, two isomers), 7.34 (d,  $J =$

7.9 Hz, 1H, two isomers), 7.07 (d,  $J = 7.9$  Hz, 1H, two isomers), 6.40 (s, 0.60H, one isomer), 6.34 (s, 0.40H, one isomer), 4.30 - 4.18 (m, 3.20H, two isomers), 4.05 - 3.96 (m, 0.80H, two isomers), 2.97 - 2.94 (m, 0.40H, one isomer), 2.73 - 2.70 (m, 0.60H, one isomer), 2.63 - 2.51 (m, 2H, two isomers), 2.47 (s, 3H, two isomers), 2.44 - 2.42 (m, 0.40H, two isomers), 2.37 - 2.34 (m, 0.60H, two isomers), 2.22 - 2.17 (m, 0.60H, one isomer), 1.98 - 1.91 (m, 0.40H, one isomer), 1.44 - 1.40 (m, 6.80H, two isomers), 1.31 - 1.24 (m, 7H, two isomers), 1.10 (t,  $J = 7.1$  Hz, 1.20H, two isomers);  $^{13}\text{C}$  NMR (101 MHz,  $\text{CDCl}_3$ )  $\delta$  174.01 & 173.26 (two isomers), 171.21 & 171.15 (two isomers), 171.06 & 169.82 (two isomers), 147.22 & 143.82 (two isomers), 135.01 & 133.97 (two isomers), 133.27 & 133.26 (two isomers), 127.21 & 126.74 (two isomers), 124.11 & 123.99 (two isomers), 118.40 & 118.37 (two isomers), 115.62 & 115.45 (two isomers), 103.59 (overlap, two isomers), 60.86 & 60.83 (two isomers), 60.75 & 60.66 (two isomers), 56.38 & 55.64 (two isomers), 53.08 & 50.02 (two isomers), 49.45 & 48.85 (two isomers), 47.14 & 41.42 (two isomers), 37.77 & 33.25 (two isomers), 33.07 & 33.01 (two isomers), 31.59 & 30.51 (two isomers), 26.51 & 25.75 (two isomers), 24.70 & 20.83 (two isomers), 20.80 & 19.66 (two isomers), 13.03 & 12.99 (two isomers), 12.80 (overlap, two isomers); HRMS (ESI-TOF) Calcd for  $\text{C}_{25}\text{H}_{32}\text{NO}_5$   $[\text{M}+\text{H}]^+$ : 426.2278; found: 426.2273.

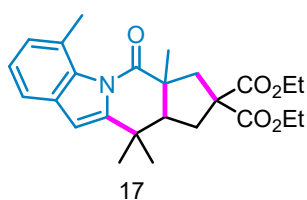

Diethyl 3a,6,11,11-tetramethyl-4-oxo-3a,4,11,11a-tetrahydro-1H-cyclopenta-[4,5]-pyrido[1,2-a]indole-2,2(3H)-dicarboxylate (**17**):

Yellow oil; Eluent:petroluem ether/ethyl acetate 200:1;  $dr = 1.0:1$ , 80.3 mg, 63%;  $^1\text{H}$  NMR (400 MHz, Chloroform- $d$ )  $\delta$  8.25 (d,  $J = 8.2$  Hz, 1H, two isomers), 7.19 (td,  $J = 7.8, 2.0$  Hz, 1H, two isomers), 7.05 (dd,  $J = 7.4, 2.9$  Hz, 1H, two isomers), 6.48 (s, 0.50H, one isomer), 6.42 (s, 0.50H, one isomer), 4.24 - 4.19 (m, 3H, two isomers), 4.01 - 3.98 (m, 1H, two isomers), 2.96 - 2.93 (m, 0.50H, one isomer), 2.74 - 2.70 (m, 0.50H,

one isomer), 2.63 - 2.54 (m, 2H, two isomers), 2.50 (s, 3H, two isomers), 2.45 - 2.44 (m, 0.50H, one isomer), 2.39 - 2.35 (m, 0.50H, one isomer), 2.23 - 2.18 (m, 0.50H, one isomer), 1.99 - 1.92 (m, 0.50H, one isomer), 1.48 - 1.41 (m, 6H, two isomers), 1.28 - 1.24 (m, 7.50H, two isomers), 1.10 (t,  $J = 7.1$  Hz, 1.50H, two isomers);  $^{13}\text{C}$  NMR (101 MHz,  $\text{CDCl}_3$ )  $\delta$  175.00 & 174.23 (two isomers), 172.23 & 172.19 (two isomers), 172.09 & 170.83 (two isomers), 148.35 & 144.96 (two isomers), 135.43 & 134.37 (two isomers), 130.06 & 129.57 (two isomers), 129.24 & 129.18 (two isomers), 124.38 & 124.36 (two isomers), 124.16 (overlap, two isomers), 113.83 & 113.73 (two isomers), 103.12 (overlap, two isomers), 61.90 & 61.87 (two isomers), 61.79 & 61.70 (two isomers), 57.44 & 56.67 (two isomers), 54.14 & 51.06 (two isomers), 50.51 & 49.90 (two isomers), 48.22 & 42.43 (two isomers), 38.80 & 34.35 (two isomers), 34.21 & 34.11 (two isomers), 32.71 & 31.55 (two isomers), 27.54 & 26.81 (two isomers), 25.81 (overlap, two isomers), 20.66 & 18.46 (two isomers), 14.07 & 14.02 (two isomers), 13.84 (overlap, two isomers); HRMS (ESI-TOF) Calcd for  $\text{C}_{25}\text{H}_{32}\text{NO}_5$   $[\text{M}+\text{H}]^+$ : 426.2278; found: 426.2275.

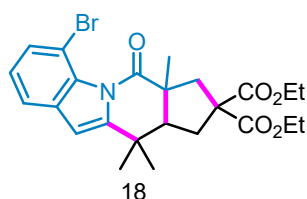

Diethyl 6-bromo-3a,11,11-trimethyl-4-oxo-3a,4,11,11a-tetrahydro-1H-cyclopenta-[4,5]-pyrido[1,2-a]indole-2,2(3H)-dicarboxylate (**18**):

Yellow oil; Eluent:petroluem ether/ethyl acetate 200:1;  $dr = 2.3:1$ , 95.6 mg, 65%;  $^1\text{H}$  NMR (400 MHz, Chloroform- $d$ )  $\delta$  7.56 - 7.41 (m, 2H, two isomers), 7.14 - 7.08 (m, 1H, two isomers), 6.42 (s, 0.70H, one isomer), 6.37 (s, 0.30H, one isomer), 4.35 - 4.07 (m, 4H, two isomers), 3.00 - 2.98 (m, 0.30H, one isomer), 2.74 - 2.71 (m, 0.70H, one isomer), 2.65 - 2.56 (m, 2H, two isomers), 2.45 - 2.32 (m, 1.40H, two isomers), 1.87 - 1.81 (m, 0.60H, two isomers), 1.48 - 1.42 (m, 6H, two isomers), 1.33 - 1.22 (m, 8H, two isomers), 1.18 - 1.14 (m, 1H, two isomers);  $^{13}\text{C}$  NMR (101 MHz,  $\text{CDCl}_3$ )  $\delta$  172.76 & 172.28 (two isomers), 172.19 & 172.11 (two isomers), 171.69 & 170.41 (two

isomers), 152.17 & 148.94 (two isomers), 134.41 & 134.32 (two isomers), 133.93 & 133.61 (two isomers), 129.63 & 129.21 (two isomers), 124.97 & 124.71 (two isomers), 119.22 & 119.17 (two isomers), 109.09 & 108.26 (two isomers), 104.17 & 103.18 (two isomers), 61.91 & 61.88 (two isomers), 61.85 & 61.77 (two isomers), 59.22 & 56.50 (two isomers), 55.65 & 53.42 (two isomers), 51.33 & 50.83 (two isomers), 47.14 & 42.45 (two isomers), 39.10 & 35.32 (two isomers), 34.78 & 32.10 (two isomers), 32.03 & 31.71 (two isomers), 26.37 & 25.62 (two isomers), 25.54 & 20.18 (two isomers), 14.07 & 14.05 (two isomers), 14.00 & 13.92 (two isomers); HRMS (ESI-TOF) Calcd for  $C_{24}H_{29}NO_5Br$   $[M+H]^+$ : 490.1224; found: 490.1216.

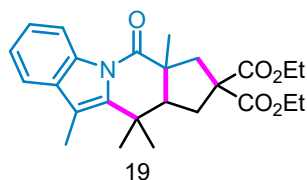

Diethyl 3a,10,11,11-tetramethyl-4-oxo-3a,4,11,11a-tetrahydro-1H-cyclopenta-[4,5]-pyrido[1,2-a]indole-2,2(3H)-dicarboxylate (**19**):

Yellow oil; Eluent:petroluem ether/ethyl acetate 200:1; *dr* > 99:1, 89.3 mg, 70%;  $^1H$  NMR (400 MHz, Chloroform-*d*)  $\delta$  8.47 - 8.45 (m, 1H), 7.45 - 7.43 (m, 1H), 7.32 - 7.27 (m, 2H), 4.26 - 4.18 (m, 2H), 4.07 - 3.98 (m, 2H), 3.08 (d, *J* = 14.6 Hz, 1H), 2.56 - 2.52 (m, 2H), 2.34 (s, 3H), 2.11 - 2.10 (m, 2H), 1.61 - 1.58 (m, 6H), 1.46 (s, 3H), 1.27 (t, *J* = 7.1 Hz, 3H), 1.13 (t, *J* = 7.1 Hz, 3H);  $^{13}C$  NMR (101 MHz,  $CDCl_3$ )  $\delta$  173.97, 172.31, 171.03, 138.19, 134.69, 132.14, 124.58, 123.57, 117.63, 116.51, 113.79, 61.79, 61.70, 56.92, 55.81, 50.02, 47.53, 38.92, 35.31, 30.71, 28.43, 27.09, 14.04, 13.88, 9.76; HRMS (ESI-TOF) Calcd for  $C_{25}H_{32}NO_5$   $[M+H]^+$ : 426.2278; found: 426.2271.

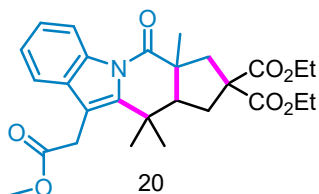

Diethyl 10-(2-methoxy-2-oxoethyl)-3a,11,11-trimethyl-4-oxo-3a,4,11,11a-tetrahydro-1H-cyclopenta[4,5]pyrido[1,2-a]indole-2,2(3H)-dicarboxylate (**20**):

Yellow solid; Eluent:petroleum ether/ethyl acetate 200:1,  $dr = 1.0:1$ , 98.5 mg, 68%;  $^1\text{H}$  NMR (400 MHz, Chloroform- $d$ )  $\delta$  8.45 (d,  $J = 8.3$  Hz, 1H, two isomers), 7.47 (t,  $J = 6.9$  Hz, 1H, two isomers), 7.34 - 7.25 (m, 2H, two isomers), 4.29 - 4.18 (m, 3.20H, two isomers), 4.05 - 3.95 (m, 0.80H, two isomers), 3.93 - 3.85 (m, 2H, two isomers), 3.69 - 3.68 (m, 3H, two isomers), 3.01 - 2.97 (m, 0.50H, one isomer), 2.77 - 2.73 (m, 0.50H, one isomer), 2.69 - 2.55 (m, 2H, two isomers), 2.51 - 2.46 (m, 0.50H, one isomer), 2.39 - 2.33 (m, 0.50H, one isomer), 2.16 - 2.02 (m, 1H, two isomers), 1.61 (s, 1.50H, two isomers), 1.53 - 1.47 (m, 4.50H, two isomers), 1.30 - 1.24 (m, 7.50H, two isomers), 1.10 (t,  $J = 7.1$  Hz, 1.50H, two isomers);  $^{13}\text{C}$  NMR (101 MHz,  $\text{CDCl}_3$ )  $\delta$  174.99 & 174.27 (two isomers), 172.17 & 172.15 (two isomers), 172.07 & 171.41 (two isomers), 171.22 & 170.81 (two isomers), 143.33 & 140.32 (two isomers), 134.78 & 134.16 (two isomers), 131.28 & 131.00 (two isomers), 124.95 & 124.93 (two isomers), 123.86 & 123.70 (two isomers), 118.06 & 117.85 (two isomers), 116.43 & 116.27 (two isomers), 111.27 & 111.09 (two isomers), 61.90 & 61.88 (two isomers), 61.81 & 61.71 (two isomers), 57.28 & 56.54 (two isomers), 55.85 & 52.22 (two isomers), 52.18 & 51.78 (two isomers), 49.95 & 49.34 (two isomers), 48.08 & 42.23 (two isomers), 38.88 & 35.89 (two isomers), 34.51 & 31.76 (two isomers), 31.52 & 31.28 (two isomers), 31.16 & 30.43 (two isomers), 27.68 & 27.23 (two isomers), 23.46 & 20.51 (two isomers), 14.06 & 14.02 (two isomers), 13.82 (overlap, two isomers); HRMS (ESI-TOF) Calcd for  $\text{C}_{27}\text{H}_{34}\text{NO}_7$   $[\text{M}+\text{H}]^+$ : 484.2330; found: 484.2332.

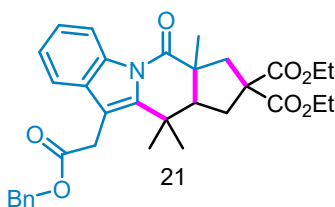

Diethyl 10-(2-(benzyloxy)-2-oxoethyl)-3a,11,11-trimethyl-4-oxo-3a,4,11,11a-tetrahydro-1H-cyclopenta[4,5]pyrido[1,2-a]indole-2,2(3H)-dicarboxylate (**21**):

Yellow oil; Eluent:petroleum ether/ethyl acetate 200:1;  $dr = 1.0:1$ , 115.7 mg, 69%;  $^1\text{H}$  NMR (400 MHz, Chloroform- $d$ )  $\delta$  8.37 (d,  $J = 8.1$  Hz, 1H, two isomers), 7.40 - 7.36 (m, 1H, two isomers), 7.25 - 7.14 (m, 7H, two isomers), 5.08 - 5.01 (m, 2H, two

isomers), 4.29 - 4.09 (m, 3H, two isomers), 3.98 - 3.90 (m, 1H, two isomers), 3.88 - 3.76 (m, 2H, two isomers), 2.93 - 2.89 (m, 0.50H, one isomer), 2.69 - 2.65 (m, 0.50H, one isomer), 2.54 - 2.36 (m, 0.50H, one isomer), 2.29 - 2.23 (m, 0.50H, one isomer), 2.05 - 1.93 (m, 1H, two isomers), 1.51 - 1.50 (m, 3H, two isomers), 1.41 - 1.39 (m, 3H, two isomers), 1.22 - 1.16 (m, 7.50H, two isomers), 1.01 (t,  $J = 7.1$  Hz, 1.50H, two isomers);  $^{13}\text{C}$  NMR (101 MHz,  $\text{CDCl}_3$ )  $\delta$  173.96 & 173.21 (two isomers), 171.11 & 171.03 (two isomers), 169.77 & 169.67 (two isomers), 169.46 (overlap, two isomers), 142.30 & 139.35 (two isomers), 134.61 & 134.56 (two isomers), 133.75 & 133.12 (two isomers), 130.21 & 129.96 (two isomers), 127.48 & 127.47 (two isomers), 127.25 & 127.21 (two isomers), 123.92 & 123.90 (two isomers), 122.81 & 122.63 (two isomers), 117.16 & 116.92 (two isomers), 115.38 & 115.18 (two isomers), 110.22 & 110.04 (two isomers), 65.83 & 65.80 (two isomers), 60.86 & 60.84 (two isomers), 60.76 & 60.67 (two isomers), 56.21 & 55.50 (two isomers), 54.80 & 50.70 (two isomers), 48.90 & 48.30 (two isomers), 47.06 & 41.16 (two isomers), 37.85 & 34.81 (two isomers), 33.45 & 30.78 (two isomers), 30.47 & 30.36 (two isomers), 30.19 & 29.63 (two isomers), 26.66 & 26.17 (two isomers), 22.46 & 19.43 (two isomers), 13.02 & 12.98 (two isomers), 12.78 (overlap, two isomers); HRMS (ESI-TOF) Calcd for  $\text{C}_{33}\text{H}_{38}\text{NO}_7$   $[\text{M}+\text{H}]^+$ : 560.2643; found: 560.2643.

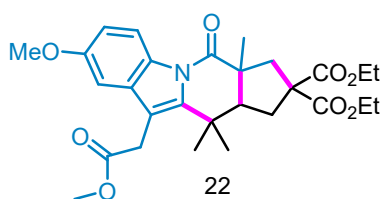

Diethyl 8-methoxy-10-(2-methoxy-2-oxoethyl)-3a,11,11-trimethyl-4-oxo-3a,4,11,11a-tetrahydro-1H-cyclopenta[4,5]pyrido[1,2-a]indole-2,2(3H)-dicarboxylate (**22**):

Yellow oil; Eluent:petroluem ether/ethyl acetate 200:1;  $dr = 1.5:1$ , 107.7 mg, 70%;  $^1\text{H}$  NMR (400 MHz, Chloroform- $d$ )  $\delta$  8.34 - 8.31 (m, 1H, two isomers), 6.93 - 6.88 (m, 2H, two isomers), 4.27 - 4.16 (m, 3H, two isomers), 4.03 - 3.94 (m, 1H, two isomers), 3.86 - 3.82 (m, 5H, two isomers), 3.68 (s, 3H, two isomers), 3.01 - 2.97 (m, 0.60H, one isomer), 2.74 - 2.70 (m, 0.40H, one isomer), 2.61 - 2.52 (m, 2H, two isomers), 2.48 -

2.44 (m, 0.40H, one isomer), 2.37 - 2.31 (m, 0.60H, one isomer), 2.13 - 2.03 (m, 1H, two isomers), 1.61 - 1.58 (m, 3H, two isomers), 1.51 - 1.45 (m, 3H, two isomers), 1.29 - 1.23 (m, 7.20H, two isomers), 1.10 (t,  $J = 7.1$  Hz, 1.80H, two isomers);  $^{13}\text{C}$  NMR (101 MHz,  $\text{CDCl}_3$ )  $\delta$  174.66 & 173.76 (two isomers), 172.17 & 172.15 (two isomers), 172.12 & 171.37 (two isomers), 171.17 & 170.85 (two isomers), 156.81 & 156.63 (two isomers), 144.04 & 141.09 (two isomers), 132.30 & 132.12 (two isomers), 129.39 & 128.78 (two isomers), 117.29 & 117.07 (two isomers), 112.77 & 112.57 (two isomers), 111.14 & 110.89 (two isomers), 101.48 (overlap, two isomers), 61.89 & 61.87 (two isomers), 61.80 & 61.71 (two isomers), 57.17 & 56.53 (two isomers), 55.89 & 55.77 (two isomers), 55.73 & 52.23 (two isomers), 52.20 & 51.80 (two isomers), 49.82 & 49.15 (two isomers), 48.01 & 42.27 (two isomers), 38.84 & 35.84 (two isomers), 34.55 & 31.69 (two isomers), 31.51 & 31.25 (two isomers), 30.50 & 27.77 (two isomers), 27.19 & 23.39 & 20.57 (two isomers), 14.05 & 14.01 (two isomers), 13.83 (overlap, two isomers); HRMS (ESI-TOF) Calcd for  $\text{C}_{28}\text{H}_{36}\text{NO}_8$   $[\text{M}+\text{H}]^+$ : 514.2435; found: 514.2422.

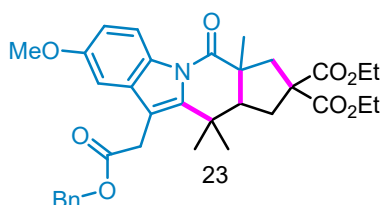

Diethyl 10-(2-(benzyloxy)-2-oxoethyl)-8-methoxy-3a,11,11-trimethyl-4-oxo-3a,4,11,11a-tetrahydro-1H-cyclopenta[4,5]pyrido[1,2-a]indole-2,2(3H)-dicarboxylate (**23**): Yellow oil; Eluent:petroluem ether/ethyl acetate 200:1;  $dr = 1.0:1$ , 90.1 mg, 51%;  $^1\text{H}$  NMR (400 MHz, Chloroform- $d$ )  $\delta$  8.33 (dd,  $J = 8.7, 4.5$  Hz, 1H, two isomers), 7.35 - 7.28 (m, 5H, two isomers), 6.90 (d,  $J = 9.9$  Hz, 2H, two isomers), 5.17 - 5.01 (m, 2H, two isomers), 4.92 - 4.17 (m, 3H, two isomers), 4.05 - 4.00 (m, 1H, two isomers), 3.90 - 3.83 (m, 2H, two isomers), 3.78 (s, 1.50H, one isomer), 3.74 (s, 1.50H, one isomer), 3.02 - 2.99 (m, 0.50H, one isomer), 2.74 - 2.71 (m, 0.50H, one isomer), 2.61 - 2.43 (m, 2.50H, two isomers), 2.36 - 2.33 (m, 0.50H, two isomers), 2.08 - 2.06 (m, 1H, two isomers), 1.49 - 1.47 (m, 3H, two isomers), 1.40 - 1.37 (m, 3H, two isomers), 1.28 -

1.23 (m, 7.50H, two isomers), 1.12 - 1.09 (m, 1.50H, two isomers);  $^{13}\text{C}$  NMR (101 MHz,  $\text{CDCl}_3$ )  $\delta$  174.69 & 173.76 (two isomers), 172.18 & 172.15 (two isomers), 170.87 & 170.68 (two isomers), 170.48 (overlap, two isomers), 156.81 & 156.61 (two isomers), 144.04 & 141.13 (two isomers), 135.63 & 135.60 (two isomers), 132.24 & 132.08 (two isomers), 129.38 & 128.76 (two isomers), 128.54 & 128.34 (two isomers), 128.29 (overlap, two isomers), 117.31 & 117.07 (two isomers), 113.11 & 112.88 (two isomers), 111.13 & 110.89 (two isomers), 101.33 (overlap, two isomers), 66.90 & 61.90 (two isomers), 61.88 & 61.80 (two isomers), 61.73 & 57.16 (two isomers), 56.55 & 55.90 (two isomers), 55.68 & 55.62 (two isomers), 51.78 & 49.82 (two isomers), 49.16 & 48.03 (two isomers), 42.24 & 38.87 (two isomers), 35.81 & 34.54 (two isomers), 31.80 & 31.51 (two isomers), 31.45 & 31.26 (two isomers), 30.78 & 29.71 (two isomers), 27.83 & 27.19 (two isomers), 23.47 & 20.54 (two isomers), 14.13 & 14.06 (two isomers), 14.02 & 13.84 (two isomers); HRMS (ESI-TOF) Calcd for  $\text{C}_{34}\text{H}_{40}\text{NO}_8$   $[\text{M}+\text{H}]^+$ : 590.2748; found: 590.2731.

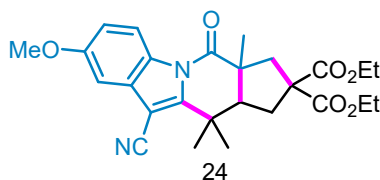

Diethyl 10-cyano-8-methoxy-3a,11,11-trimethyl-4-oxo-3a,4,11,11a-tetrahydro-1H-cyclopenta[4,5]pyrido[1,2-a]indole-2,2(3H)-dicarboxylate (**24**):

Yellow oil; Eluent:petroluem ether/ethyl acetate 200:1;  $dr = 1.0:1$ , 85.3 mg, 61%;  $^1\text{H}$  NMR (400 MHz,  $\text{Chloroform-}d$ )  $\delta$  8.37 - 8.34 (m, 1H, two isomers), 7.00 - 6.93 (m, 2H, two isomers), 4.30 - 4.18 (m, 3H, two isomers), 4.08 - 3.97 (m, 1H, two isomers), 3.89 (s, 3H, two isomers), 3.07 - 3.03 (m, 0.50H, one isomer), 2.75 - 2.72 (m, 0.50H, one isomer), 2.63 - 2.57 (m, 2H, two isomers), 2.50 - 2.45 (m, 0.50H, one isomer), 2.39 - 2.37 (m, 0.50H, one isomer), 2.17 - 2.03 (m, 1H, two isomers), 1.60 - 1.52 (m, 6H, two isomers), 1.39 - 1.25 (m, 7.50H, two isomers), 1.12 (t,  $J = 7.1$  Hz, 1.50H, two isomers);  $^{13}\text{C}$  NMR (101 MHz,  $\text{CDCl}_3$ )  $\delta$  174.48 & 174.11 (two isomers), 173.57 & 172.03 (two isomers), 172.02 & 170.84 (two isomers), 157.09 & 156.94 (two isomers),

144.39 & 141.76 (two isomers), 130.59 & 130.44 (two isomers), 129.20 (overlap, two isomers), 117.72 & 117.43 (two isomers), 117.22 & 116.81 (two isomers), 113.80 & 113.48 (two isomers), 106.83 & 106.42 (two isomers), 100.47 & 100.40 (two isomers), 62.00 & 61.97 (two isomers), 61.91 & 61.85 (two isomers), 56.94 & 56.45 (two isomers), 55.84 & 55.81 (two isomers), 55.75 & 51.59 (two isomers), 49.97 & 49.15 (two isomers), 47.83 & 42.18 (two isomers), 38.83 & 35.70 (two isomers), 30.96 & 30.14 (two isomers), 29.71 & 29.67 (two isomers), 28.07 & 27.08 (two isomers), 23.33 & 20.57 (two isomers), 14.06 & 14.02 (two isomers), 13.85 & 13.49 (two isomers); HRMS (ESI-TOF) Calcd for C<sub>26</sub>H<sub>31</sub>N<sub>2</sub>O<sub>6</sub> [M+H]<sup>+</sup>: 467.2214; found: 467.2234.

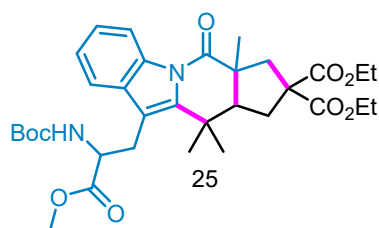

Diethyl 10-(2-((*tert*-butoxycarbonyl)amino)-3-methoxy-3-oxopropyl)-3a,11,11-trimethyl-4-oxo-3a,4,11,11a-tetrahydro-1*H*-cyclopenta[4,5]pyrido[1,2-*a*]indole-2,2(3*H*)-dicarboxylate (**25**):

Yellow oil; Eluent:petroluem ether/ethyl acetate 200:1; *dr* = 2.3:1, 115.7 mg, 63%; <sup>1</sup>H NMR (400 MHz, Chloroform-*d*) δ 8.44 - 8.40 (m, 1H, two isomers), 7.53 - 7.44 (m, 1H, two isomers), 7.31 - 7.25 (m, 2H, two isomers), 5.30 - 5.15 (m, 1H, two isomers), 4.75 - 4.57 (m, 1H, two isomers), 4.31 - 4.18 (m, 2.80H, two isomers), 4.02 - 3.92 (m, 1.20H, two isomers), 3.56 - 3.43 (m, 3H, two isomers), 3.33 - 3.19 (m, 2H, two isomers), 2.94 - 2.89 (m, 0.70H, one isomer), 2.78 - 2.75 (m, 0.30H, one isomer), 2.61 - 2.57 (m, 2H, two isomers), 2.39 - 2.32 (m, 0.30H, one isomer), 2.16 - 2.11 (m, 0.70H, one isomer), 2.07 - 2.00 (m, 1H, two isomers), 1.67 - 1.47 (m, 9H, two isomers), 1.38 - 1.30 (m, 6.90H, two isomers), 1.29 - 1.26 (m, 6H, two isomers), 1.12 - 1.07 (m, 2.10H, two isomers); <sup>13</sup>C NMR (101 MHz, CDCl<sub>3</sub>) δ 174.99 & 174.43 (two isomers), 172.82 (overlap, two isomers), 172.20 & 172.04 (two isomers), 170.80 & 170.18 (two isomers), 154.84 (overlap, two isomers), 140.15 & 140.09 (two isomers), 134.85 & 134.31 (two isomers), 131.17 & 124.86 (two isomers), 123.76 & 123.59 (two isomers),

118.28 & 117.94 (two isomers), 116.31 & 116.23 (two isomers), 113.59 & 113.51 (two isomers), 113.46 & 113.41 (two isomers), 79.96 (overlap, two isomers), 61.90 & 61.81 (two isomers), 61.68 (overlap, two isomers), 57.46 & 57.06 (two isomers), 56.55 & 55.97 (two isomers), 54.13 & 53.97 (two isomers), 52.34 & 52.30 (two isomers), 50.26 & 49.79 (two isomers), 49.33 & 49.29 (two isomers), 48.48 & 48.34 (two isomers), 42.13 & 38.91 (two isomers), 36.19 & 34.71 (two isomers), 32.15 & 31.96 (two isomers), 31.77 & 31.62 (two isomers), 28.74 & 28.48 (two isomers), 28.17 & 28.10 (two isomers), 27.74 & 27.58 (two isomers), 27.33 & 27.18 (two isomers), 14.06 & 14.02 (two isomers), 13.83 (overlap, two isomers); HRMS (ESI-TOF) Calcd for C<sub>33</sub>H<sub>45</sub>N<sub>2</sub>O<sub>9</sub> [M+H]<sup>+</sup>: 613.3098; found: 613.3120.

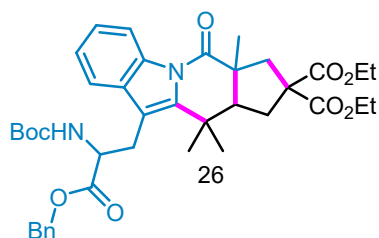

Diethyl 10-(3-(benzyloxy)-2-((*tert*-butoxycarbonyl)amino)-3-oxopropyl)-3a,11,11-trimethyl-4-oxo-3a,4,11,11a-tetrahydro-1*H*-cyclopenta[4,5]pyrido[1,2-*a*]indole-2,2(3*H*)-dicarboxylate (**26**):

Yellow oil; Eluent:petroleum ether/ethyl acetate 200:1; *dr* = 1.0:1, 132.1 mg, 64%; <sup>1</sup>H NMR (400 MHz, Chloroform-*d*) δ 8.48 - 8.42 (m, 1H, two isomers), 7.25 - 6.77 (m, 9H, two isomers), 5.32 - 4.97 (m, 2H, two isomers), 4.89 - 4.56 (m, 2H, two isomers), 4.31 - 4.17 (m, 3H, two isomers), 4.12 - 3.90 (m, 1H, two isomers), 3.66 - 3.12 (m, 2H, two isomers), 2.95 - 2.90 (m, 0.50H, one isomer), 2.74 - 2.69 (m, 0.50H, one isomer), 2.57 - 2.53 (m, 2H, two isomers), 2.42 - 2.39 (m, 1H, two isomers), 2.12 - 1.95 (m, 1H), 1.69 - 1.38 (m, 6.50H, two isomers), 1.42 - 1.38 (m, 6H, two isomers), 1.32 - 1.24 (m, 9H, two isomers), 1.10 - 1.02 (m, 2.50H, two isomers); <sup>13</sup>C NMR (101 MHz, CDCl<sub>3</sub>) δ 175.01 & 174.33 (two isomers), 172.19 (overlap, one isomer), 172.06 (overlap, one isomer), 170.75 & 170.71 (two isomers), 154.86 (overlap, one isomer), 143.28 (overlap, one isomer), 140.19 & 140.09 (two isomers), 135.03 & 134.91 (two isomers), 134.86 & 134.78 (two isomers), 134.55 & 134.33 (two isomers), 128.53 & 128.42 (two

isomers), 128.28 & 128.17 (two isomers), 127.79 & 127.51 (two isomers), 124.91 & 124.83 (two isomers), 123.81 & 123.65 (two isomers), 118.08 & 117.83 (two isomers), 116.49 & 116.34 (two isomers), 113.97 & 113.38 (two isomers), 113.33 & 113.22 (two isomers), 80.04 & 79.71 (two isomers), 67.55 & 67.41 (two isomers), 67.08 & 66.98 (two isomers), 61.87 & 61.80 (two isomers), 61.68 & 61.48 (two isomers), 57.39 & 56.53 (two isomers), 55.99 & 55.91 (two isomers), 51.73 & 51.51 (two isomers), 49.83 & 49.77 (two isomers), 49.22 & 48.45 (two isomers), 41.20 & 39.28 (two isomers), 35.69 (overlap, one isomer), 34.67 & 34.63 (two isomers), 31.75 (overlap, one isomer), 28.26 & 28.15 (two isomers), 27.23 & 27.15 (two isomers), 23.99 & 23.73 (two isomers), 20.99 & 20.09 (two isomers), 14.06 & 14.02 (two isomers), 13.83 (overlap, one isomer); HRMS (ESI-TOF) Calcd for  $C_{39}H_{40}N_2O_9$   $[M+H]^+$ : 689.3433; found: 689.3406.

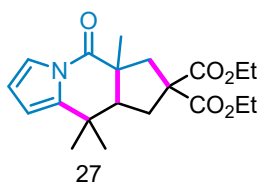

Diethyl 5a,9,9-trimethyl-5-oxo-5a,6,8a,9-tetrahydro-5H-cyclopenta[f]indolizine-7,7(8H)-dicarboxylate (**27**):

Yellow oil; Eluent:petroluem ether/ethyl acetate 200:1, *dr* > 99:1, 73.7 mg, 68%;  $^1H$  NMR (400 MHz, Chloroform-*d*)  $\delta$  7.21 - 7.20 (m, 0.88H), 7.17 - 7.16 (m, 0.12H), 6.18 - 6.16 (m, 1H), 6.01 - 6.00 (m, 0.10H), 5.95 - 5.94 (m, 0.90H), 4.18 - 4.09 (m, 2H), 4.06 - 3.99 (m, 2H), 2.96 - 2.91 (m, 1H), 2.47 - 2.43 (m, 1H), 2.41 - 2.36 (m, 1H), 2.08 - 2.03 (m, 1H), 1.98 - 1.89 (m, 1H), 1.39 - 1.27 (m, 6H), 1.22 - 1.17 (m, 6H), 1.11 (t, *J* = 7.1 Hz, 3H);  $^{13}C$  NMR (101 MHz,  $CDCl_3$ )  $\delta$  172.02, 171.17, 170.17, 139.01, 116.15, 112.13, 107.51, 60.74, 60.70, 55.88, 53.69, 49.22, 46.47, 37.60, 32.55, 31.96, 26.28, 26.18, 12.98, 12.88; HRMS (ESI-TOF) Calcd for  $C_{20}H_{28}NO_5$   $[M+H]^+$ : 362.1959; found: 362.1962.

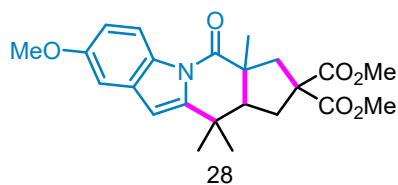

Dimethyl 8-methoxy-3a,11,11-trimethyl-4-oxo-3a,4,11,11a-tetrahydro-1*H*-cyclopenta-[4,5]-pyrido[1,2-*a*]indole-2,2(3*H*)-dicarboxylate (**28**):

Yellow oil; Eluent:petroluem ether/ethyl acetate 200:1, *dr* = 1.0:1, 91.7 mg, 74%; <sup>1</sup>H NMR (400 MHz, Chloroform-*d*) δ 8.22 (dd, *J* = 8.9, 4.0 Hz, 1H, two isomers), 6.88 (dd, *J* = 4.2, 2.6 Hz, 1H, two isomers), 6.81 (dt, *J* = 8.9, 2.6 Hz, 1H, two isomers), 6.31 (s, 0.50H, one isomer ), 6.25 (s, 0.50H, one isomer), 3.77 - 3.76 (m, 3H, two isomers), 3.71 (s, 1.50H, one isomer), 3.69 - 3.67 (m, 3H, two isomers), 3.46 (s, 1.50H, one isomer), 2.91 - 2.90 (m, 0.50H, one isomer), 2.65 - 2.62 (m, 0.50H, one isomer), 2.57 - 2.43 (m, 2H, two isomers), 2.42 - 2.35 (m, 0.50H, one isomer), 2.30 - 2.23 (m, 0.50H, one isomer), 2.13 - 2.09 (m, 0.50H, one isomer), 1.97 - 1.88 (m, 0.50H, one isomer), 1.54 (s, 1H, two isomers), 1.37 - 1.34 (m, 6H, two isomers), 1.21 - 1.81 (m, 2H, two isomers); <sup>13</sup>C NMR (101 MHz, CDCl<sub>3</sub>) δ 173.44 & 172.56 (two isomers), 171.62 & 171.57 (two isomers), 171.48 & 170.32 (two isomers), 155.71 & 155.53 (two isomers), 148.54 & 145.27 (two isomers), 130.52 & 130.16 (two isomers), 129.23 & 128.24 (two isomers), 116.00 & 115.89 (two isomers), 111.24 & 111.00 (two isomers), 103.68 & 103.60 (two isomers), 102.29 & 101.99 (two isomers), 56.17 & 55.49 (two isomers), 54.67 & 54.64 (two isomers), 53.12 & 52.08 (two isomers), 51.99 & 51.88 (two isomers), 50.04 & 49.40 (two isomers), 48.67 & 47.21 (two isomers), 41.50 & 37.85 (two isomers), 33.29 & 33.10 (two isomers), 32.96 & 31.59 (two isomers), 30.63 & 26.40 (two isomers), 25.81 & 24.59 (two isomers), 19.72 (overlap, two isomers); HRMS (ESI-TOF) Calcd for C<sub>23</sub>H<sub>28</sub>NO<sub>6</sub> [M+H]<sup>+</sup>: 414.1907; found: 414.1911.

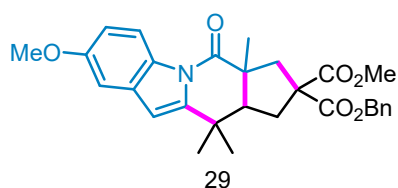

2-Benzyl 2-methyl 8-methoxy-3a,11,11-trimethyl-4-oxo-3a,4,11,11a-tetrahydro-1*H*-

cyclopenta[4,5]pyrido[1,2-*a*]indole-2,2(3*H*)-dicarboxylate (**29**):

Yellow oil; Eluent:petroleum ether/ethyl acetate 200:1, *dr* = 1.9:1, 102.7 mg, 70%; <sup>1</sup>H NMR (400 MHz, Chloroform-*d*) δ 8.32 - 8.28 (m, 1H, two isomers), 7.35 - 7.14 (m, 5H, two isomers), 6.96 - 6.86 (m, 2H, two isomers), 6.37 (s, 0.35H, one isomer), 6.31 (d, *J* = 3.7 Hz, 0.65H, one isomer), 5.25 - 5.13 (m, 1.35H, one isomer), 5.01 - 4.93 (m, 0.65H, one isomer), 3.83 (d, *J* = 3.9 Hz, 3H, two isomers), 3.70 - 3.64 (m, 2.35H, one isomer), 3.07 (d, *J* = 14.6 Hz, 0.35H, one isomer), 2.96 (d, *J* = 14.6 Hz, 0.35H, one isomer), 2.76 - 2.71 (m, 0.35H, one isomer), 2.63 - 2.50 (m, 2H, two isomers), 2.45 - 2.34 (m, 0.65H, one isomer), 2.21 - 2.09 (m, 0.65H, one isomer), 2.05 - 1.93 (m, 0.65H, one isomer), 1.59 (d, *J* = 25.6 Hz, 2H, one isomer), 1.43 - 1.37 (m, 6H, two isomers), 1.28 - 1.22 (m, 1H, one isomer); <sup>13</sup>C NMR (101 MHz, CDCl<sub>3</sub>) δ 174.45 & 173.53 (two isomers), 172.54 & 172.48 (two isomers), 171.86 & 171.65 (two isomers), 171.17 & 170.67 (two isomers), 156.78 & 156.60 (two isomers), 149.60 & 146.32 (two isomers), 135.39 & 135.33 (two isomers), 131.58 & 131.25 (two isomers), 130.29 & 129.29 (two isomers), 128.61 & 128.44 (two isomers), 128.22 & 128.18 (two isomers), 128.06 & 127.97 (two isomers), 117.12 & 116.95 (two isomers), 112.30 & 112.09 (two isomers), 104.77 & 104.69 (two isomers), 103.37 & 103.05 (two isomers), 67.44 & 67.31 (two isomers), 57.25 & 56.67 (two isomers), 55.73 & 55.68 (two isomers), 54.19 & 54.10 (two isomers), 52.89 & 52.80 (two isomers), 51.07 & 50.57 (two isomers), 50.31 & 49.71 (two isomers), 48.19 & 42.45 (two isomers), 38.83 & 34.33 (two isomers), 34.12 & 32.65 (two isomers), 31.60 & 27.42 (two isomers), 27.01 & 25.64 (two isomers), 20.83 & 20.72 (two isomers); HRMS (ESI-TOF) Calcd for C<sub>29</sub>H<sub>32</sub>NO<sub>6</sub> [M+H]<sup>+</sup>: 490.2224; found: 490.2218.

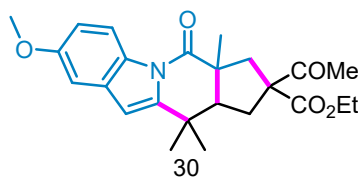

Ethyl (2*S*,3*aR*,11*aS*)-2-acetyl-8-methoxy-3*a*,11,11-trimethyl-4-oxo-2,3,3*a*,4,11,11*a*-hexahydro-1*H*-cyclopenta[4,5]pyrido[1,2-*a*]indole-2-carboxylate (**30**):

Yellow oil; Eluent:petroluem ether/ethyl acetate 200:1,  $dr = 1.0:1$ , 86.9 mg, 73%;  $^1\text{H}$  NMR (400 MHz, Chloroform- $d$ )  $\delta$  8.26 - 8.19 (m, 1H, two isomers), 6.88 - 6.87 (m, 1H, two isomers), 6.82 - 6.78 (m, 1H, two isomers), 6.31 (d,  $J = 2.7$  Hz, 0.50H, one isomer), 6.25 (d,  $J = 4.0$  Hz, 0.50H, one isomer), 4.24 - 4.11 (m, 1.50H, two isomers), 3.95 - 3.86 (m, 0.50H, two isomers), 3.77 - 3.76 (m, 3H, two isomers), 2.96 - 2.80 (m, 0.50H,one isomer), 2.59 - 2.56 (m, 0.50H,one isomer), 2.50 - 2.33 (m, 2.50H, two isomers), 2.31 - 2.24 (m, 0.50H, two isomers), 2.15 - 2.08 (m, 3H, two isomers), 1.98 - 1.97 (m, 1H, two isomers), 1.37 - 1.35 (m, 6H, two isomers), 1.24 - 1.11 (m, 5.50H, two isomers), 1.00 (t,  $J = 7.1$  Hz, 0.50H, two isomers);  $^{13}\text{C}$  NMR (101 MHz,  $\text{CDCl}_3$ )  $\delta$  201.22 & 200.95 (two isomers), 173.59 & 172.54 (two isomers), 171.80 & 171.72 (two isomers), 155.72 & 155.53 (two isomers), 148.59 & 145.24 (two isomers), 130.51 & 130.17 (two isomers), 129.16 & 128.23 (two isomers), 116.03 & 115.90 (two isomers), 111.24 & 111.02 (two isomers), 103.76 & 103.60 (two isomers), 102.32 & 101.98 (two isomers), 62.76 & 62.25 (two isomers), 61.03 & 60.92 (two isomers), 54.64 & 53.11 (two isomers), 49.97 & 49.71 (two isomers), 49.35 & 48.56 (two isomers), 45.54 & 39.91 (two isomers), 36.08 & 33.09 (two isomers), 32.92 & 31.61 (two isomers), 28.89 & 26.38 (two isomers), 26.23 & 25.46 (two isomers), 25.24 & 24.86 (two isomers), 24.58 & 19.75 (two isomers), 12.97 & 12.73 (two isomers); HRMS (ESI-TOF) Calcd for  $\text{C}_{24}\text{H}_{30}\text{NO}_5$   $[\text{M}+\text{H}]^+$ : 412.2114; found: 412.2118.

## 9. X-ray crystallography studies of compound 19

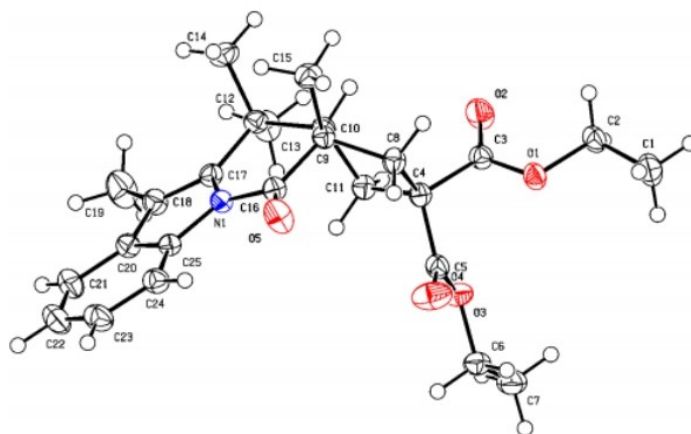

**Figure S6 Structure of 19 by X-Ray crystallographic (CCDC = 2422567)**

Single crystal suitable for X-ray diffraction was obtained by slow evaporation of a solution of compound **19** (n-hexane/dichloromethane) in a loosely capped vial.

**Table S6 Crystal data and structure refinement for 19**

| Empirical formula                  | C <sub>25</sub> H <sub>31</sub> NO <sub>5</sub> |
|------------------------------------|-------------------------------------------------|
| Formula weight                     | 425.51                                          |
| Temperature/K                      | 193.00                                          |
| Crystal system                     | monoclinic                                      |
| Space group                        | P2 <sub>1</sub> /n                              |
| a/Å                                | 8.4395(12)                                      |
| b/Å                                | 22.775(3)                                       |
| c/Å                                | 11.8083(18)                                     |
| α/°                                | 90                                              |
| β/°                                | 104.783(5)                                      |
| γ/°                                | 90                                              |
| Volume/Å <sup>3</sup>              | 2194.5(6)                                       |
| Z                                  | 4                                               |
| ρ <sub>calc</sub> /cm <sup>3</sup> | 1.288                                           |
| μ/mm <sup>-1</sup>                 | 0.460                                           |
| F(000)                             | 912.0                                           |

|                                             |                                                               |
|---------------------------------------------|---------------------------------------------------------------|
| Crystal size/mm <sup>3</sup>                | 0.152 × 0.1 × 0.1                                             |
| Radiation                                   | CuKα (λ = 1.34139)                                            |
| 2θ range for data collection/°              | 9.544 to 128.122                                              |
| Index ranges                                | -11 ≤ h ≤ 11, -30 ≤ k ≤ 30, -15 ≤ l ≤ 15                      |
| Reflections collected                       | 21671                                                         |
| Independent reflections                     | 5423 [R <sub>int</sub> = 0.0381, R <sub>sigma</sub> = 0.0295] |
| Data/restraints/parameters                  | 5423/0/286                                                    |
| Largest diff. peak/hole / e Å <sup>-3</sup> | 0.37/-0.21                                                    |

---

## 10. References

1. R.-J. Zhang, X.-R. Li, R.-B. Liang, Y. Xiao, Q.-X. Tong, J.-J. Zhong and L.-Z. Wu, Org. Lett., 2024, 26, 591-596.
2. H.-X. Feng, Y.-Y. Wang, J. Chen and L. Zhou, Adv. Synth. Catal., 2015, 357, 940-944.

## 11. NMR spectra for electrolysis products

Diethyl 3a,11,11-trimethyl-4-oxo-3a,4,11,11a-tetrahydro-1*H*-cyclopenta-[4,5]-pyrido [1,2-*a*]indole-2,2(3*H*)-dicarboxylate (**3**):



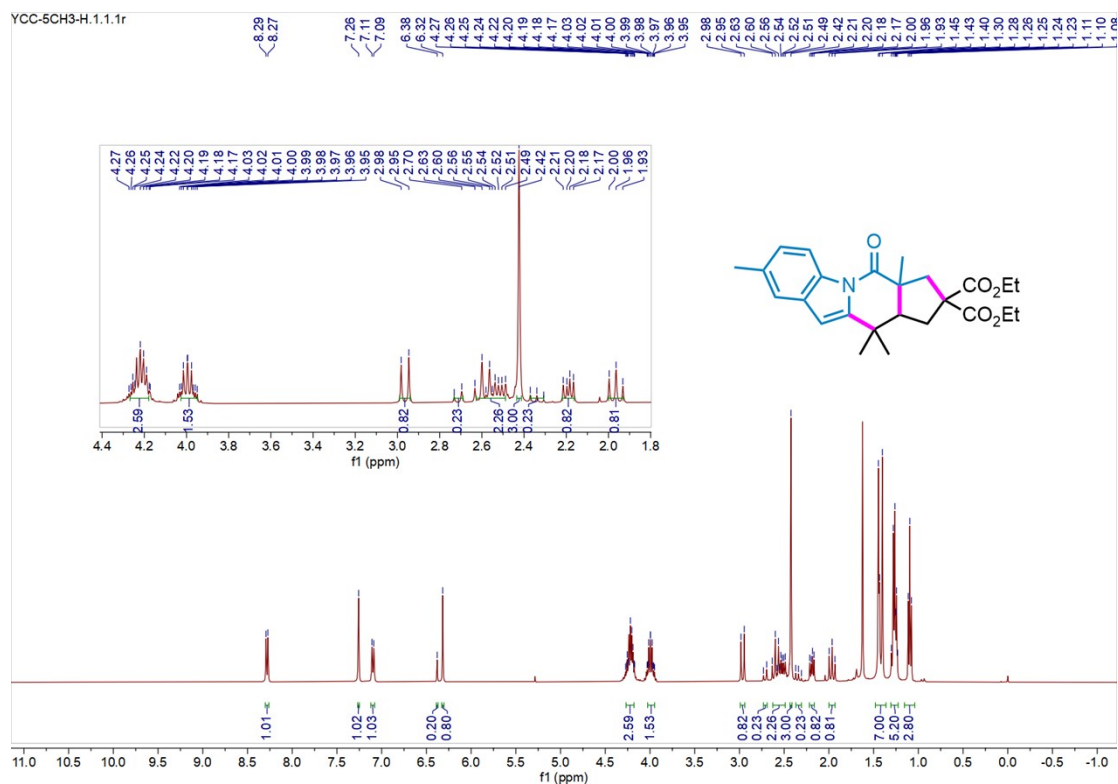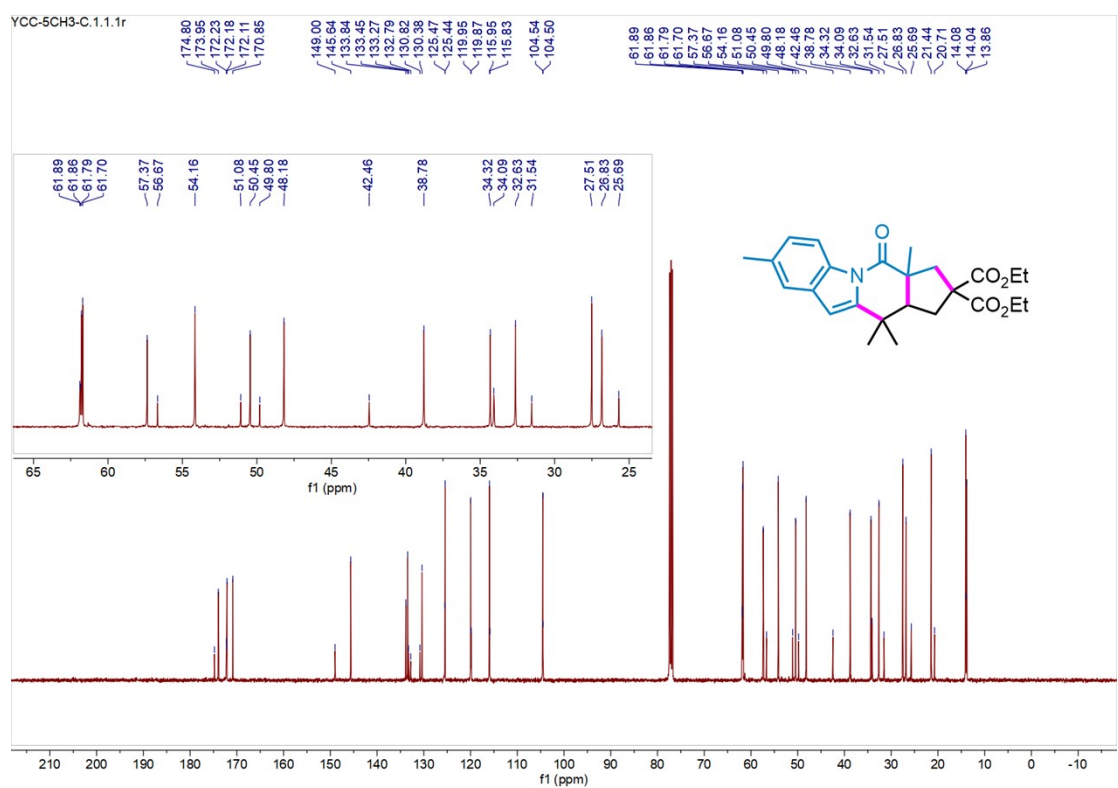

Diethyl 8-fluoro-3a,11,11-trimethyl-4-oxo-3a,4,11,11a-tetrahydro-1*H*-cyclopenta-[4,5]-pyrido[1,2-*a*]indole-2,2(3*H*)-dicarboxylate (**5**):

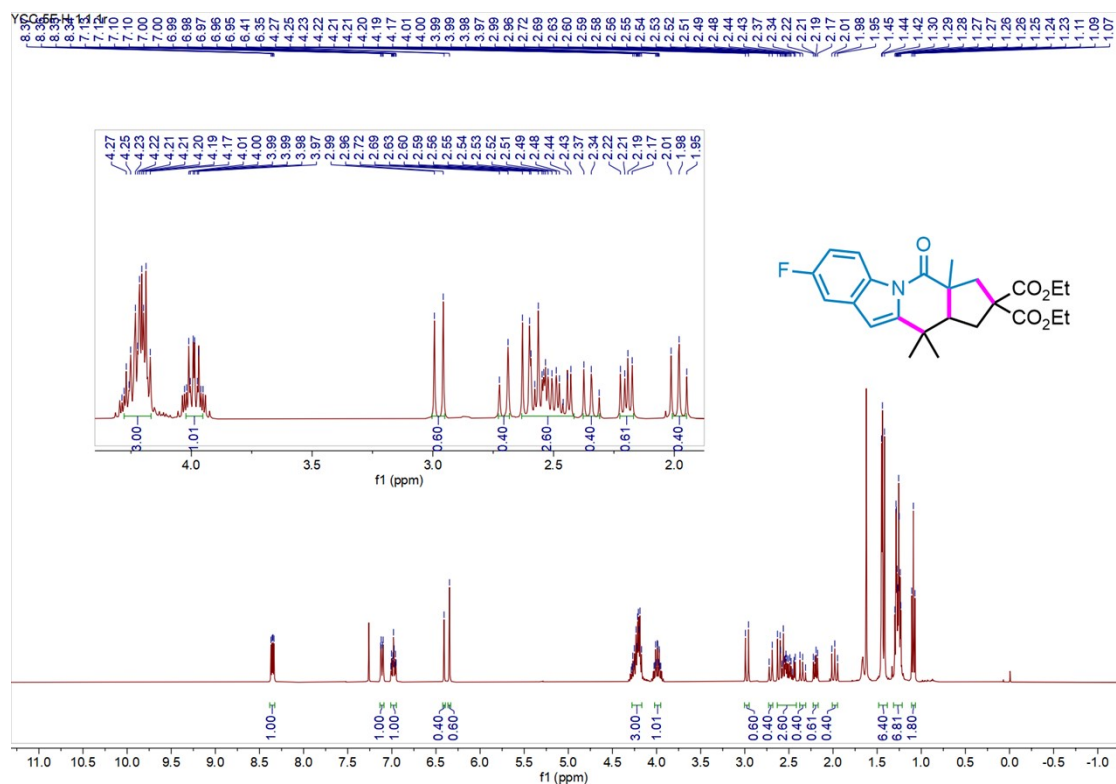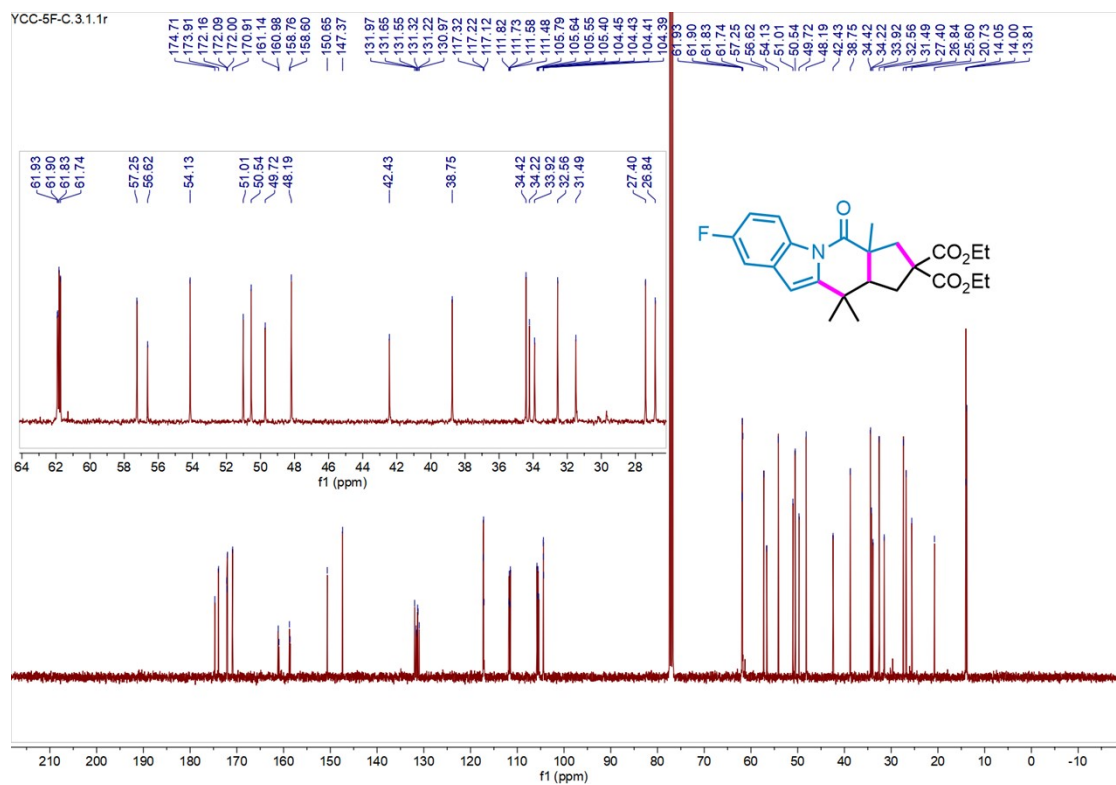

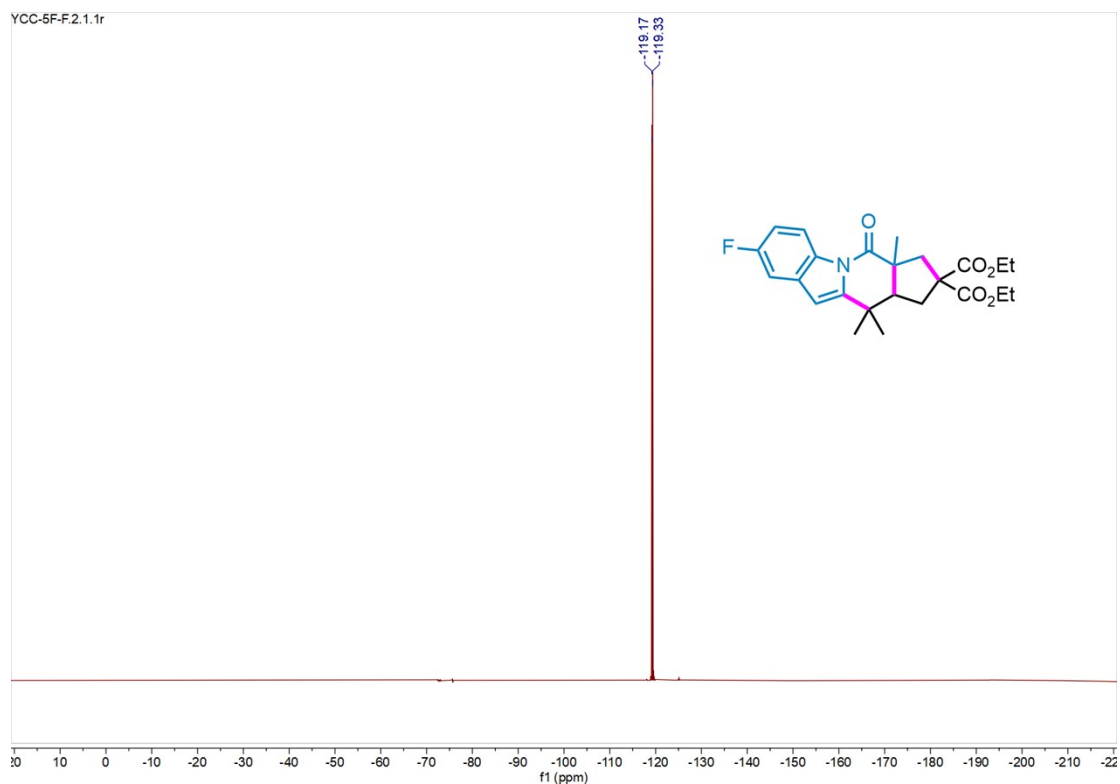

Diethyl 8-chloro-3a,11,11-trimethyl-4-oxo-3a,4,11,11a-tetrahydro-1*H*-cyclopenta-[4,5]-pyrido[1,2-*a*]indole-2,2(3*H*)-dicarboxylate (6):

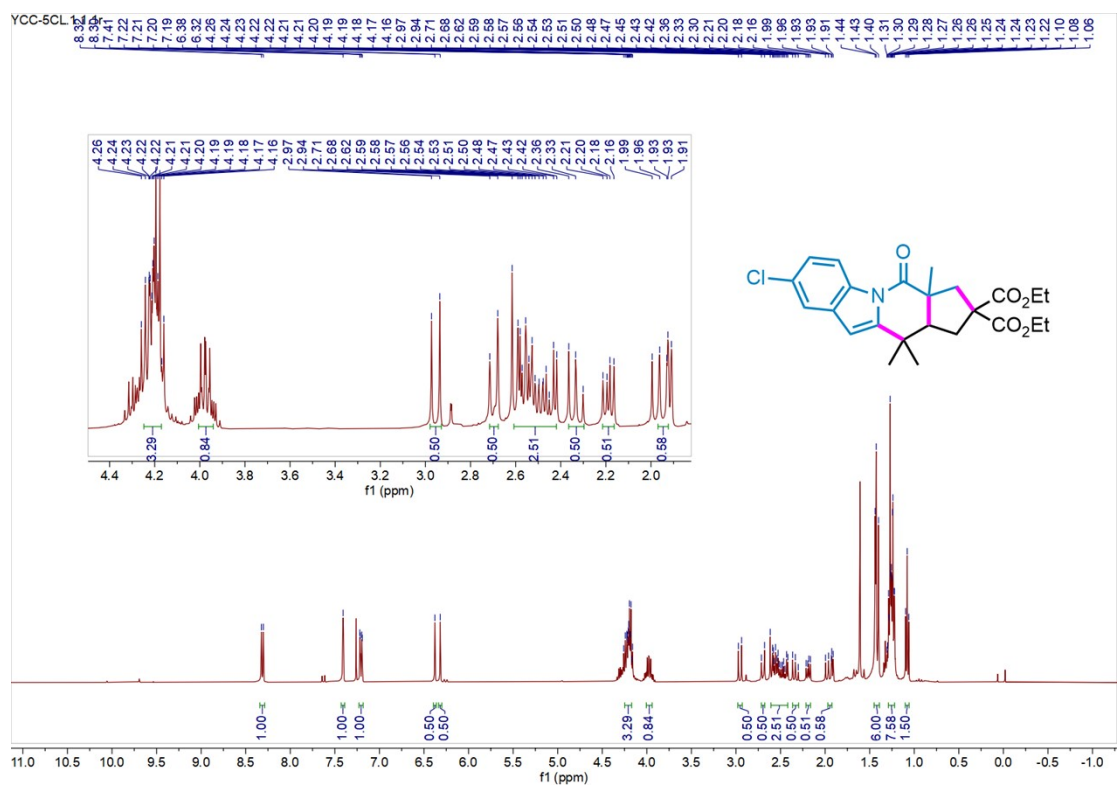

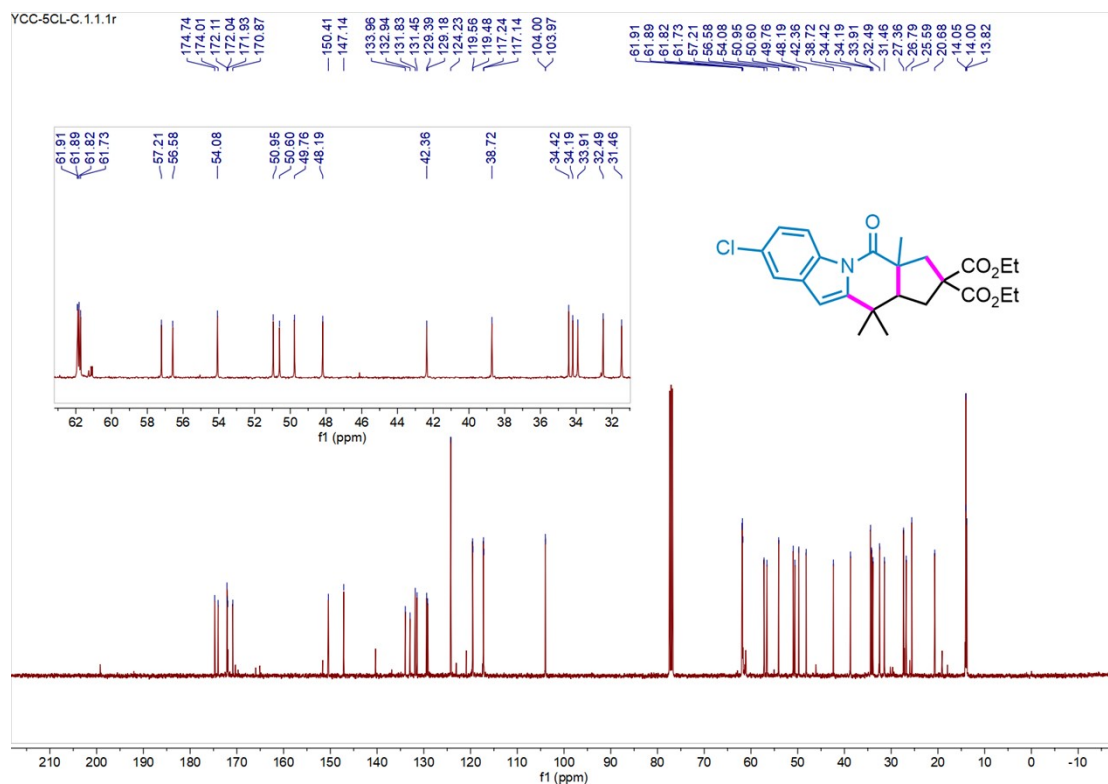

Diethyl 8-bromo-3a,11,11-trimethyl-4-oxo-3a,4,11,11a-tetrahydro-1H-cyclopenta-  
[4,5]-pyrido[1,2-a]indole-2,2(3H)-dicarboxylate (7):

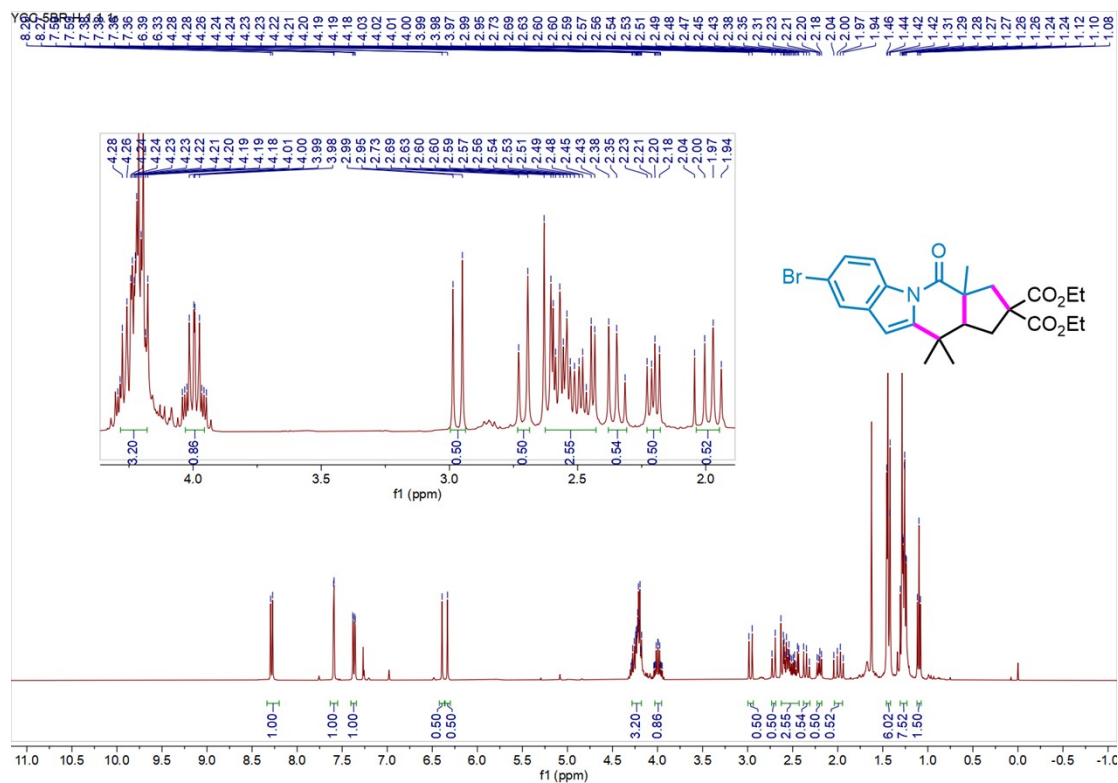



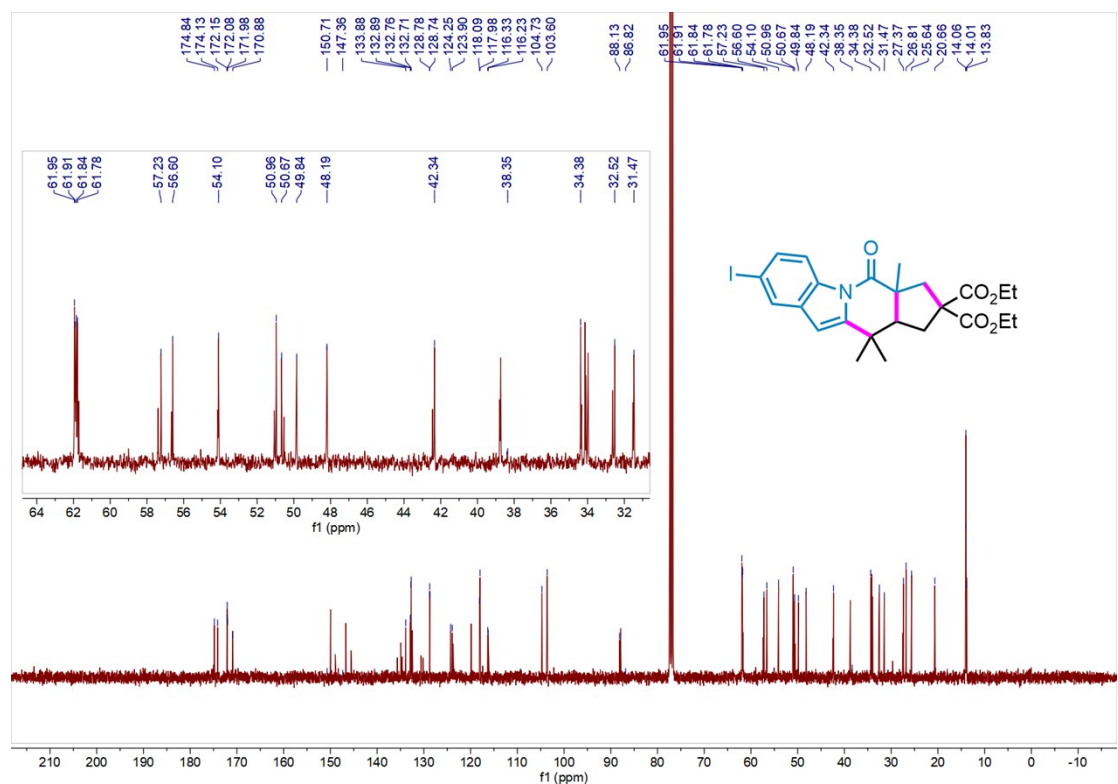

Diethyl 8-methoxy-3a,11,11-trimethyl-4-oxo-3a,4,11,11a-tetrahydro-1H-cyclopenta-[4,5]-pyrido[1,2-a]indole-2,2(3H)-dicarboxylate (9):

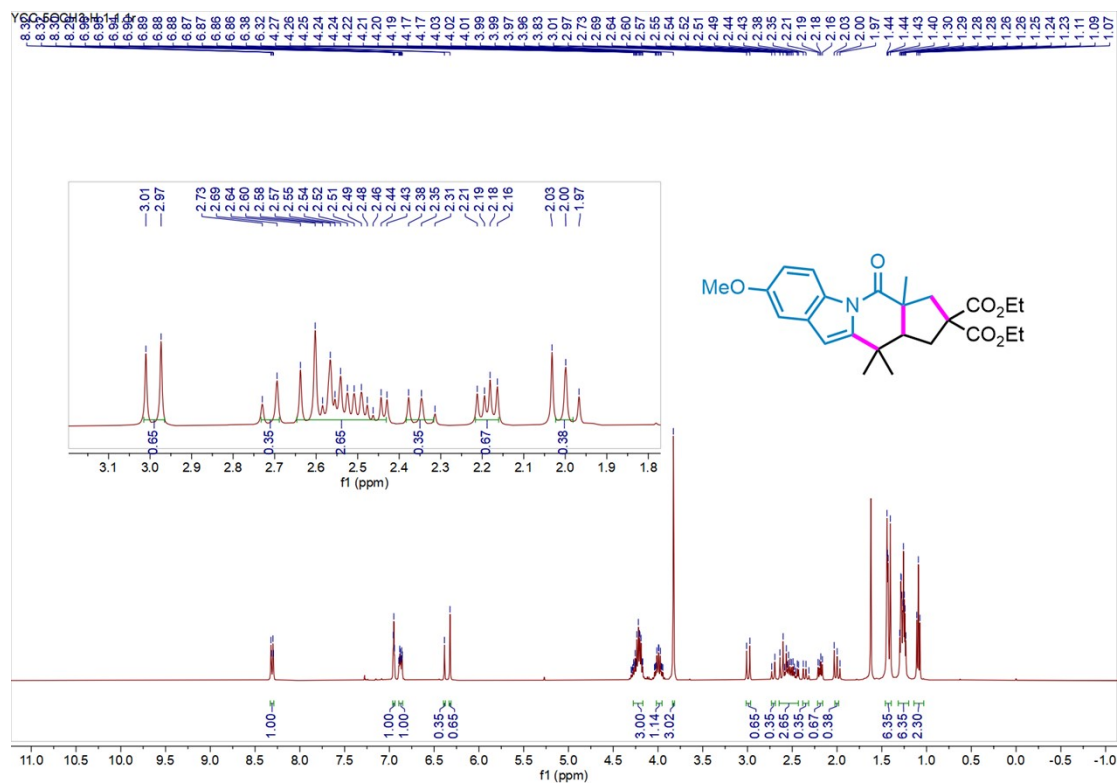

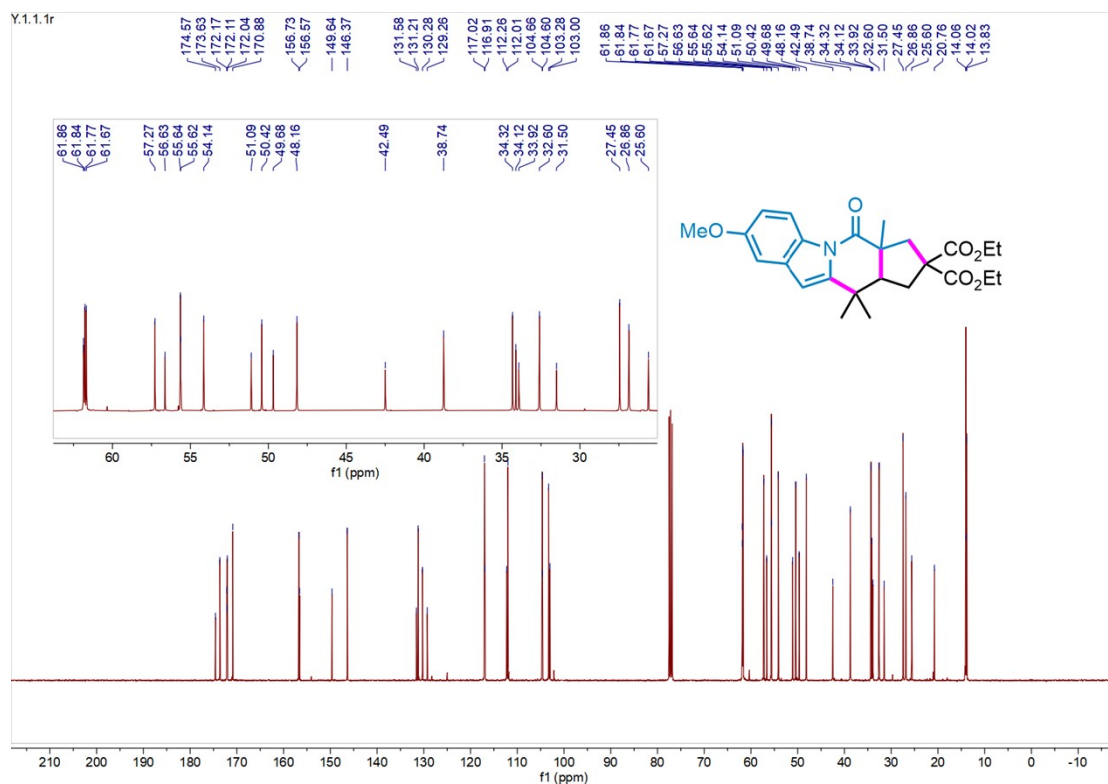

Diethyl 8-(benzyloxy)-3a,11,11-trimethyl-4-oxo-3a,4,11,11a-tetrahydro-1H-cyclopenta-[4,5]-pyrido[1,2-*a*]indole-2,2(3*H*)-dicarboxylate (**10**):

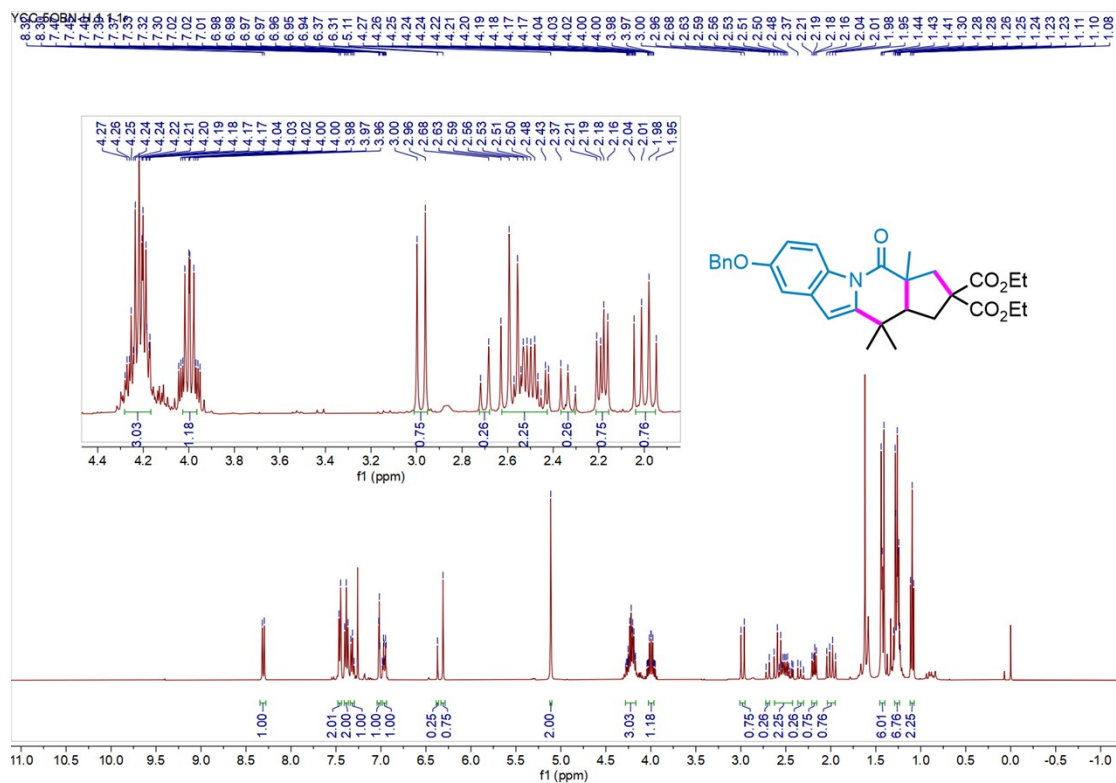

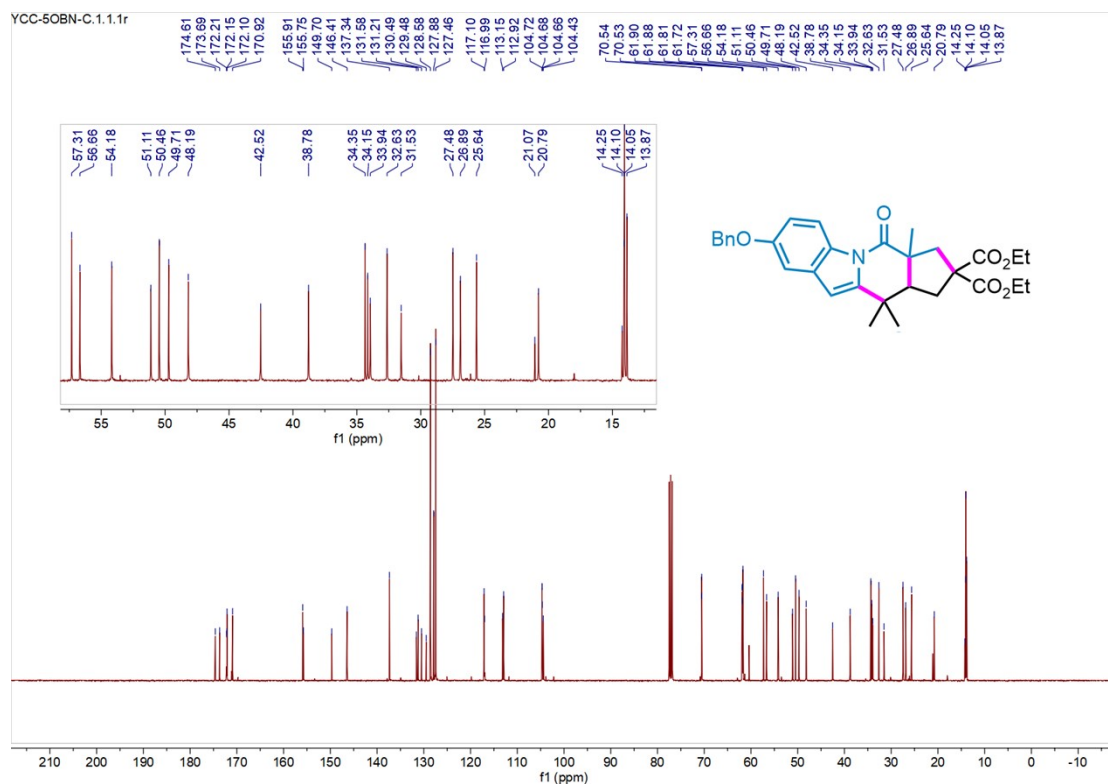

2,2-Diethyl 8-methyl 3a,11,11-trimethyl-4-oxo-3a,4,11,11a-tetrahydro-1*H*-cyclopenta-[4,5]-pyrido[1,2-*a*]indole-2,2,8(3*H*)-tricarboxylate (**11**):

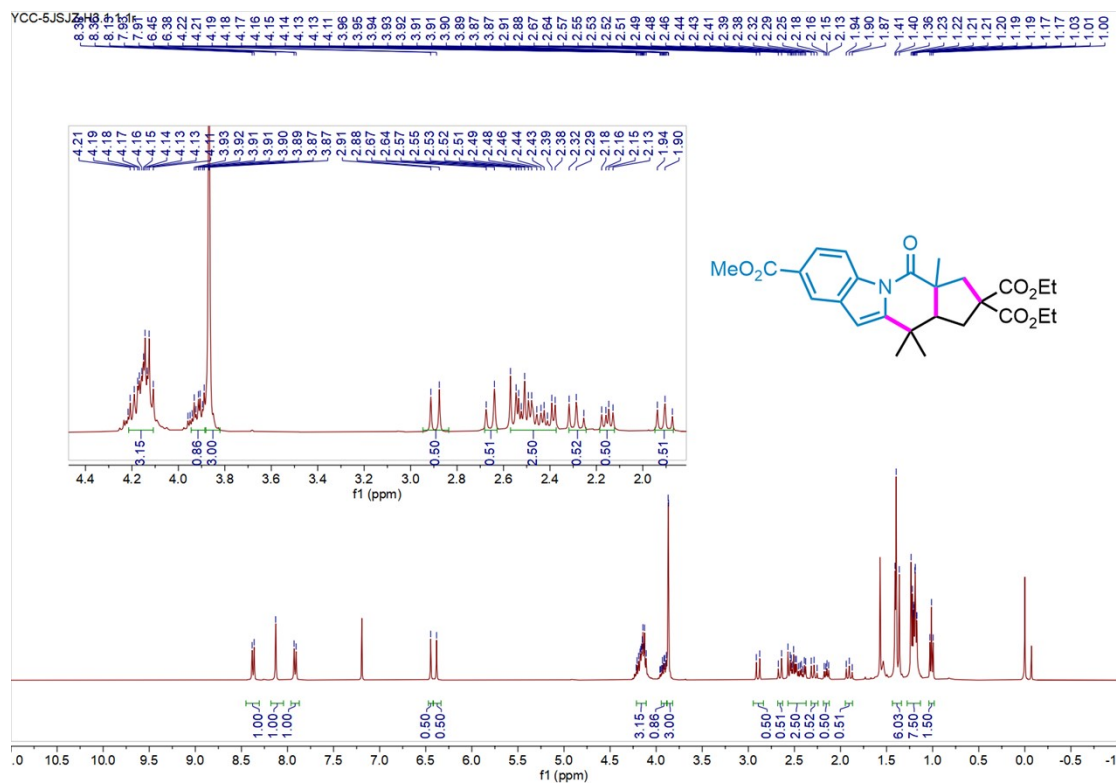

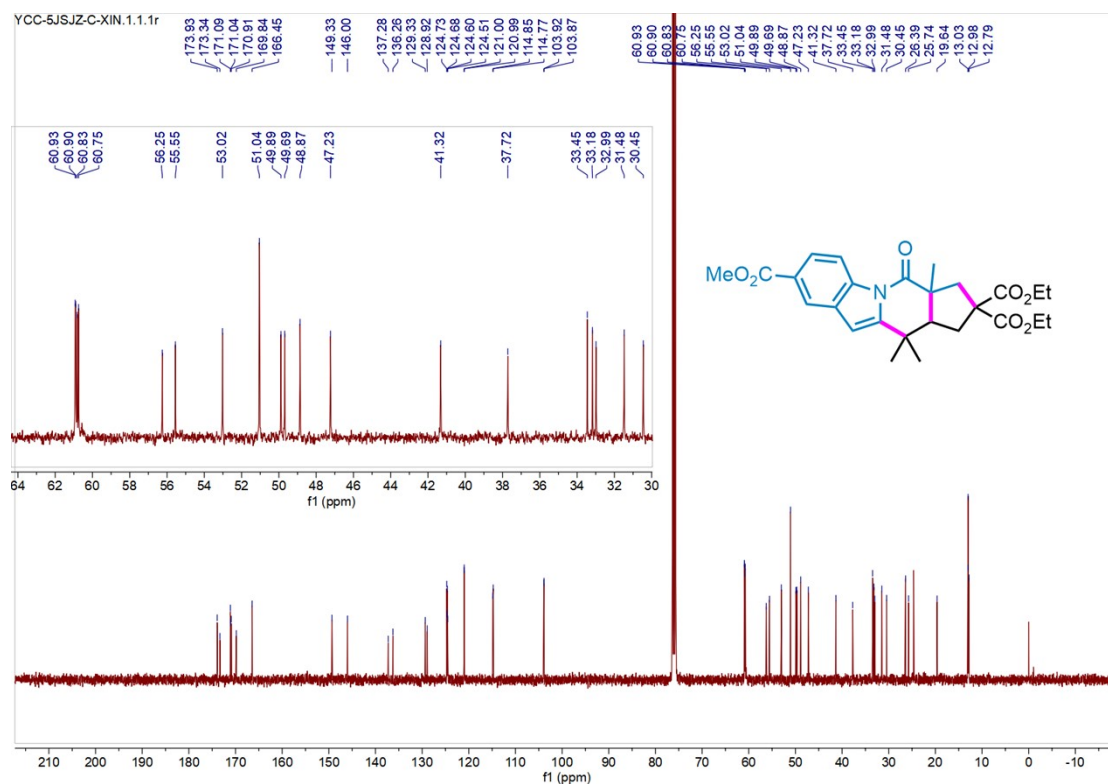

Diethyl 8-((*tert*-butoxycarbonyl)amino)-3a,11,11-trimethyl-4-oxo-3a,4,11,11a-tetrahydro-1*H*-cyclopenta[4,5]pyrido[1,2-*a*]indole-2,2(3*H*)-dicarboxylate (**12**):

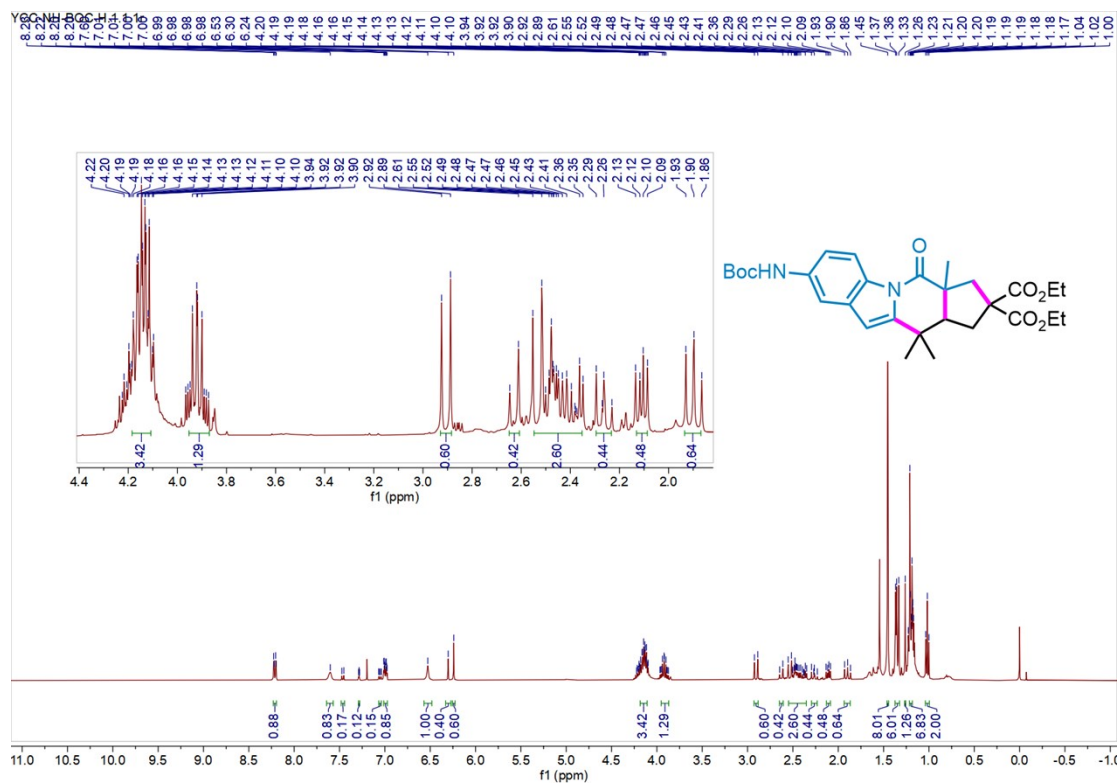



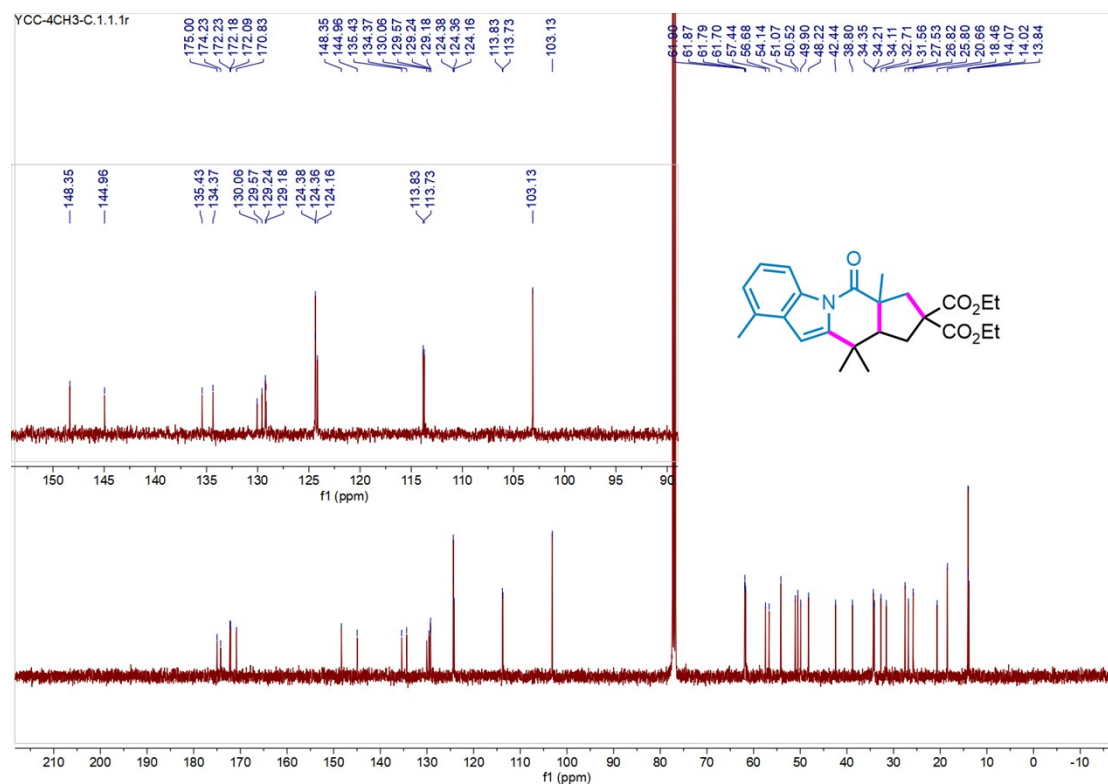

Diethyl 9-chloro-3a,11,11-trimethyl-4-oxo-3a,4,11,11a-tetrahydro-1H-cyclopenta-[4,5]-pyrido[1,2-a]indole-2,2(3H)-dicarboxylate (**14**):

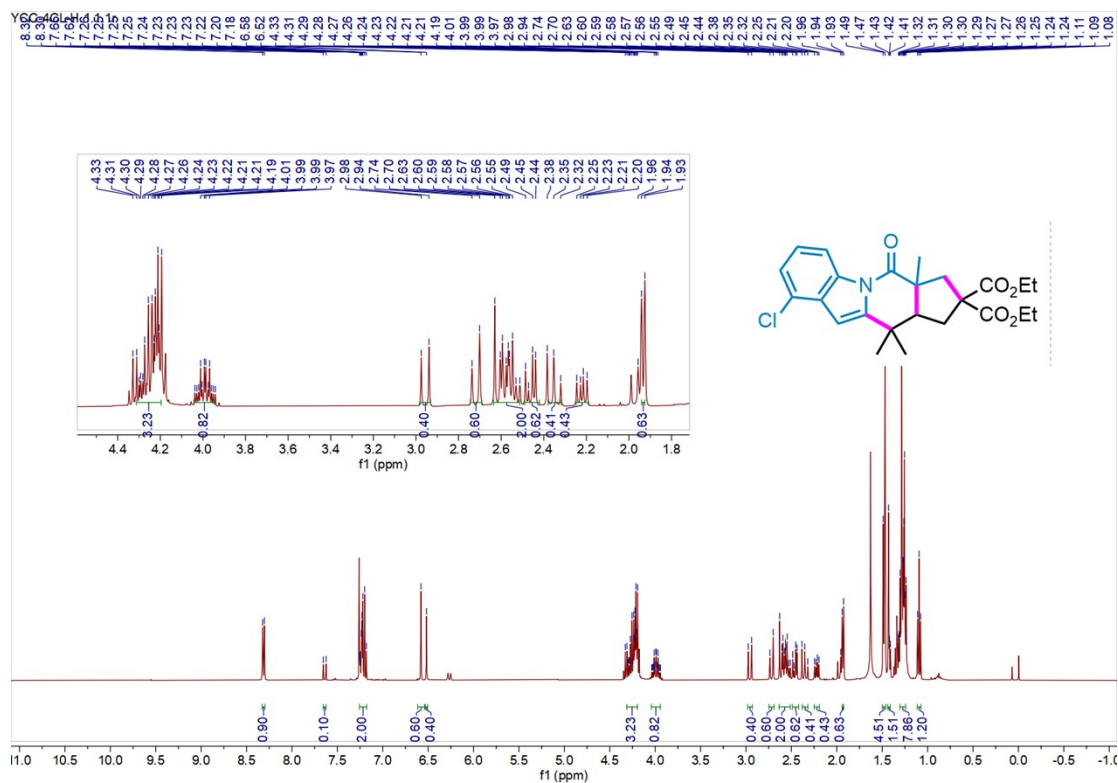

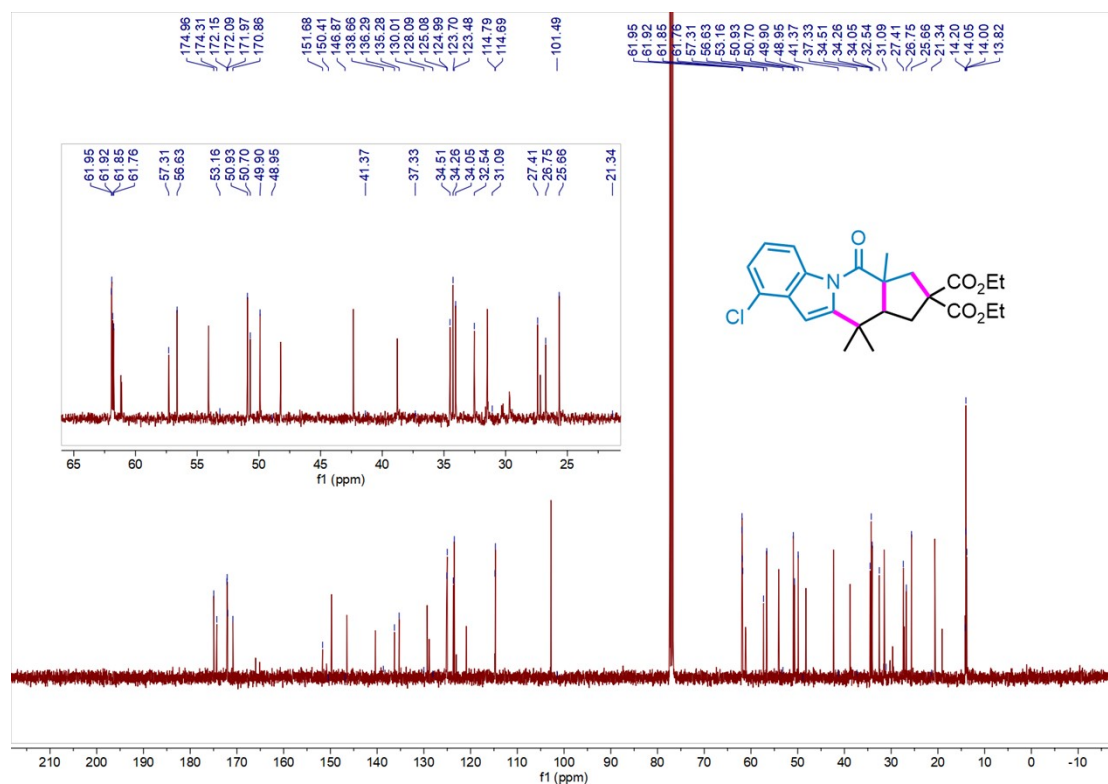

Diethyl 9-fluoro-3a,11,11-trimethyl-4-oxo-3a,4,11,11a-tetrahydro-1H-cyclopenta-  
[4,5]-pyrido[1,2-a]indole-2,2(3H)-dicarboxylate (**15**):

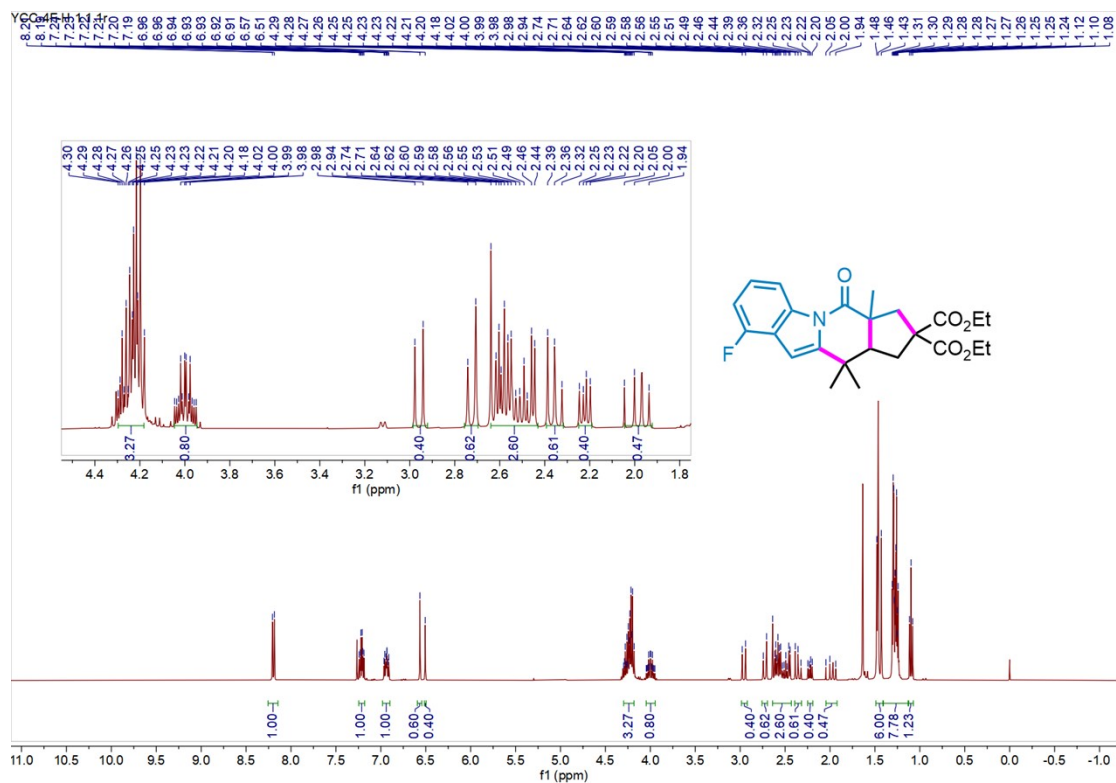

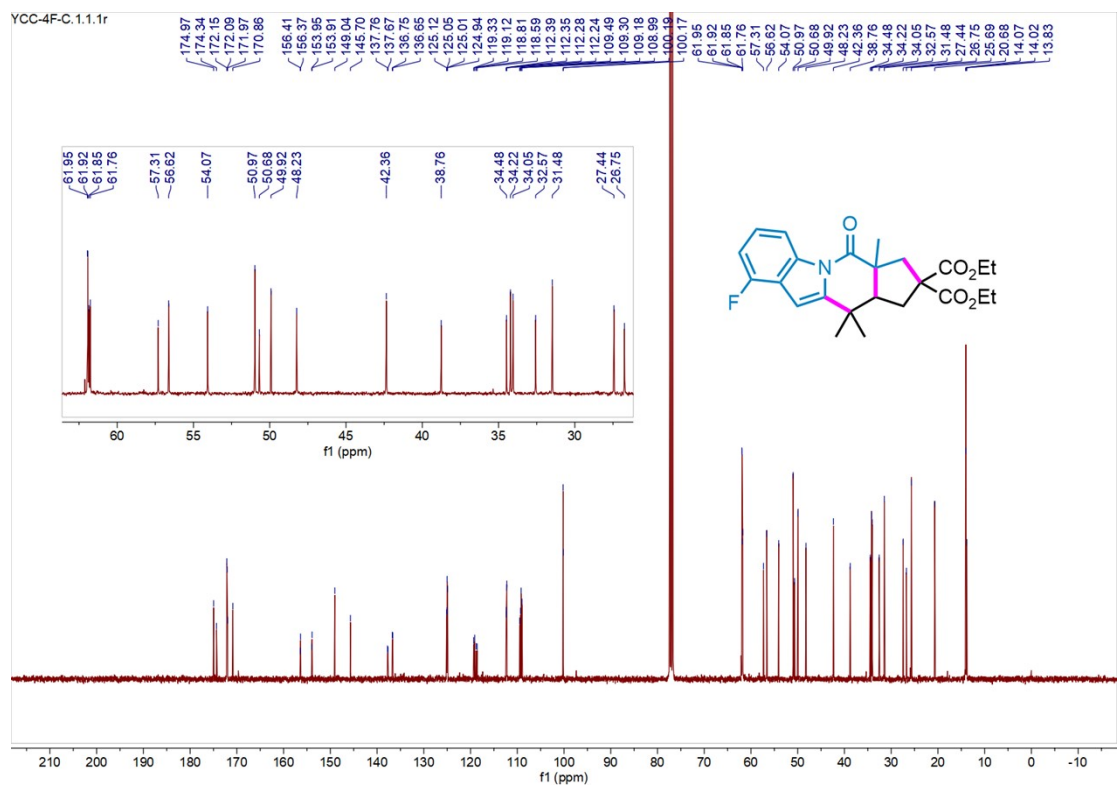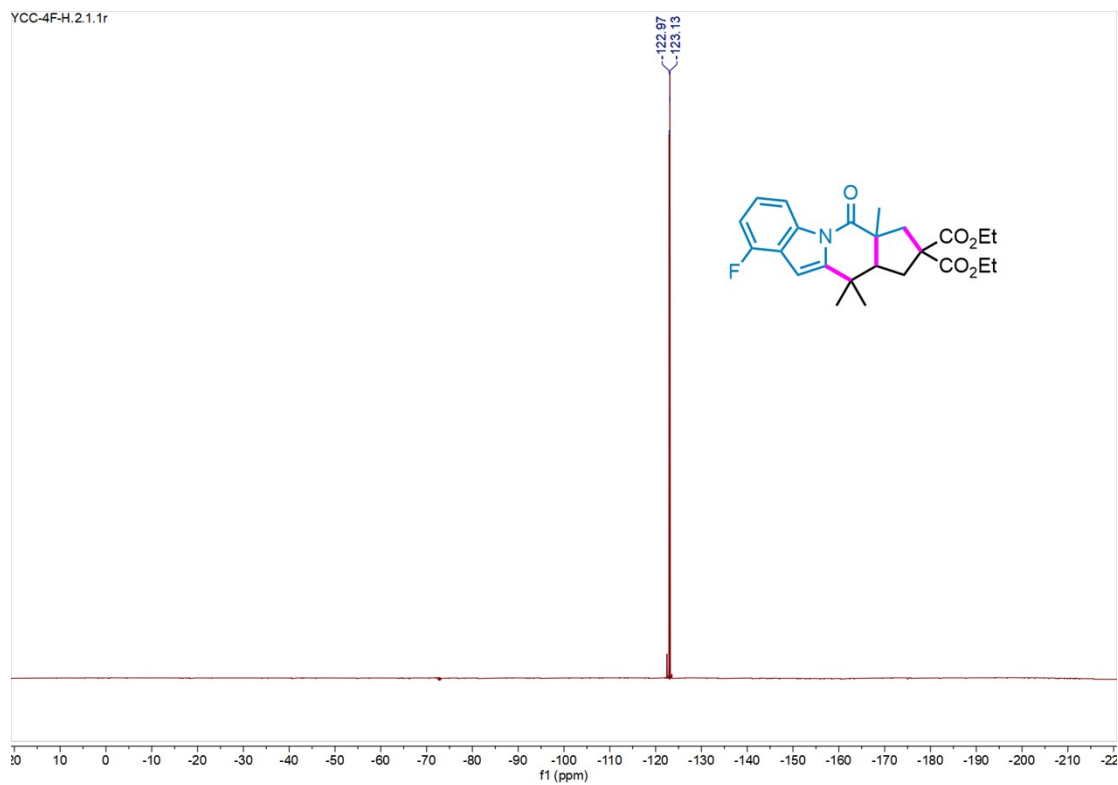

Diethyl 3a,7,11,11-tetramethyl-4-oxo-3a,4,11,11a-tetrahydro-1*H*-cyclopenta-[4,5]-pyrido[1,2-*a*]indole-2,2(3*H*)-dicarboxylate (**16**):

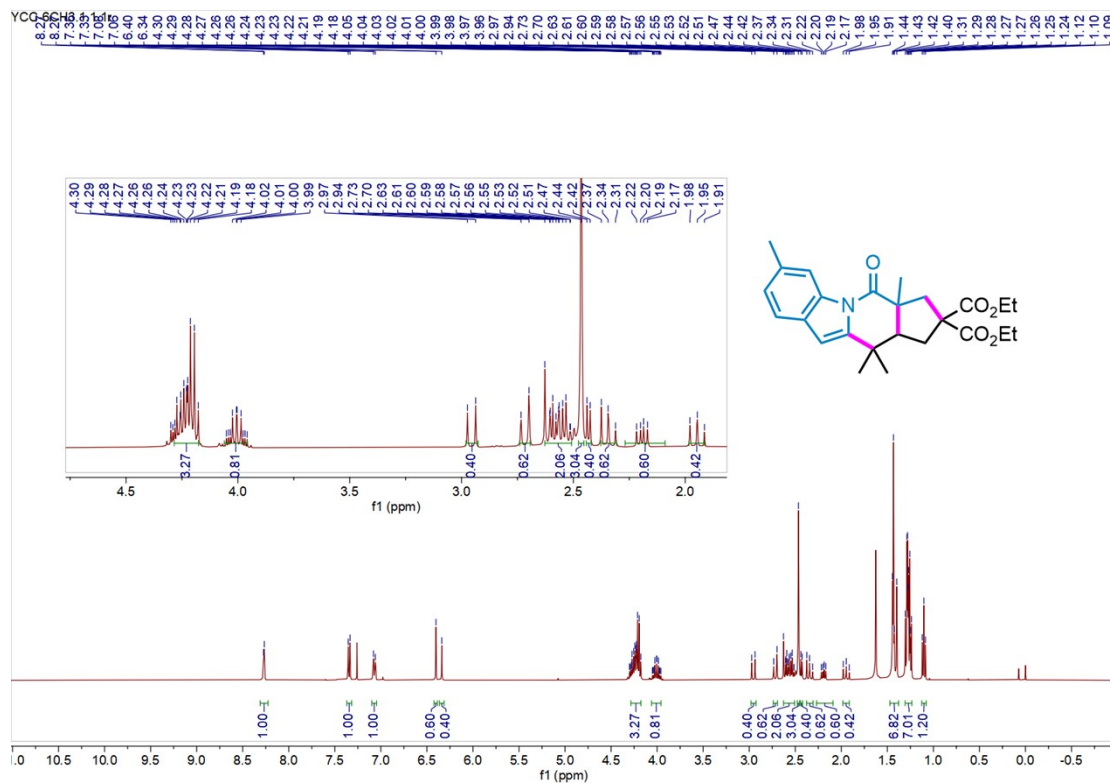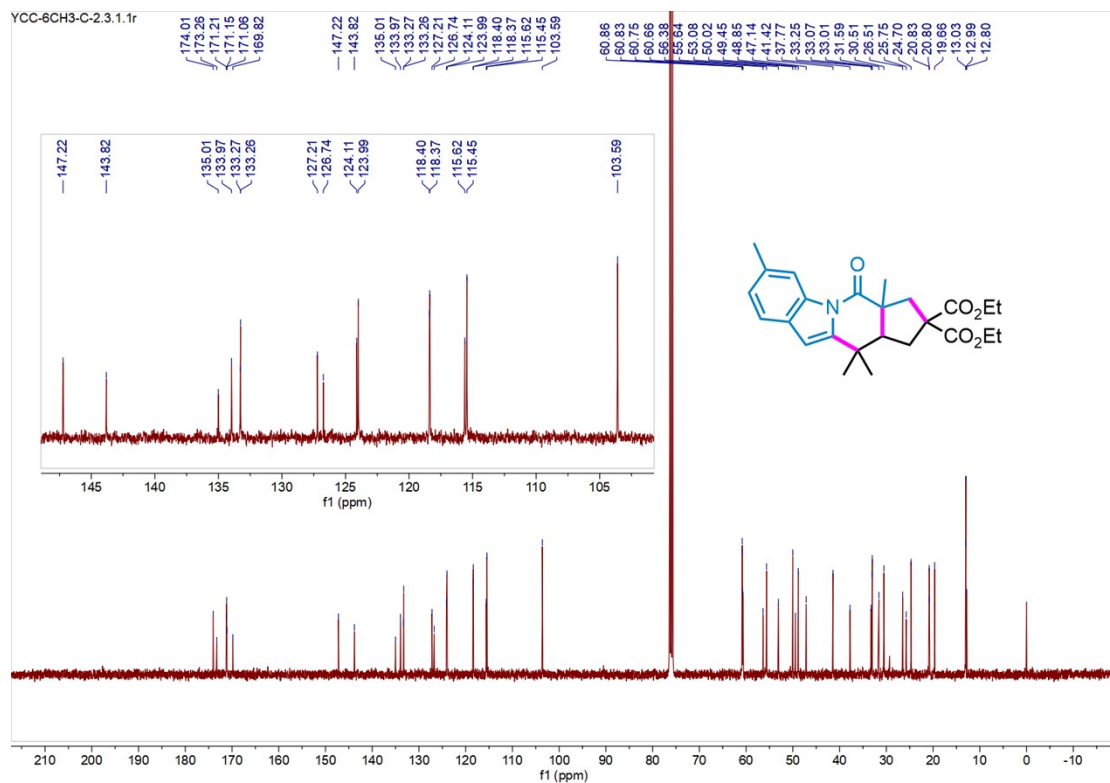

Chemical structure of compound 1: CCOC(=O)[C@H]1[C@@H](C(C)(C)C)[C@H](C(=O)Nc2ccccc2)[C@@H]1C

<sup>1</sup>H NMR spectrum (CDCl<sub>3</sub>) of compound 1. The spectrum shows peaks from 0.0 to 11.0 ppm. Key peaks include a singlet at ~10.0 ppm (NH), a doublet at ~7.2 ppm (aromatic), a multiplet between 6.5-7.5 ppm (aromatic), a singlet at ~4.3 ppm (CH), a quartet at ~4.2 ppm (CH<sub>2</sub>), a singlet at ~3.0 ppm (CH<sub>3</sub>), a doublet at ~2.5 ppm (CH<sub>2</sub>), a multiplet between 1.5-2.5 ppm (CH<sub>2</sub>/CH<sub>3</sub>), and a singlet at ~1.0 ppm (CH<sub>3</sub>). Integration values are shown below the peaks.

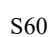

Diethyl 6-bromo-3a,11,11-trimethyl-4-oxo-3a,4,11,11a-tetrahydro-1*H*-cyclopenta-[4,5]-pyrido[1,2-*a*]indole-2,2(3*H*)-dicarboxylate (**18**):

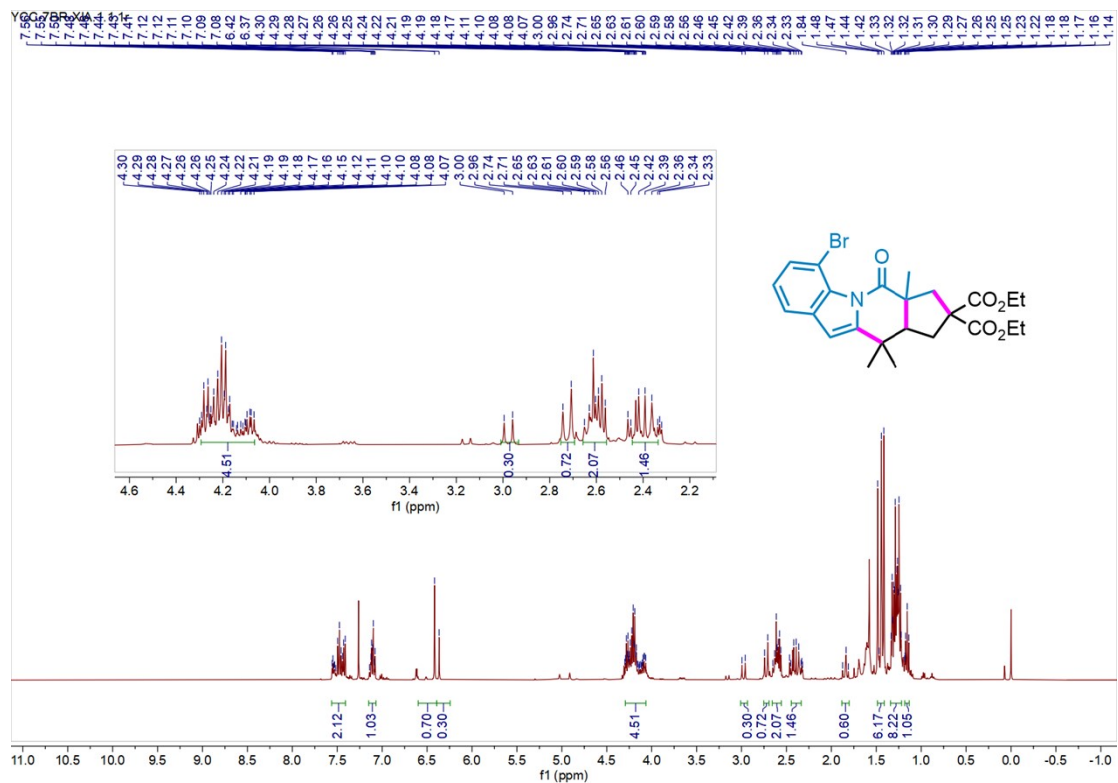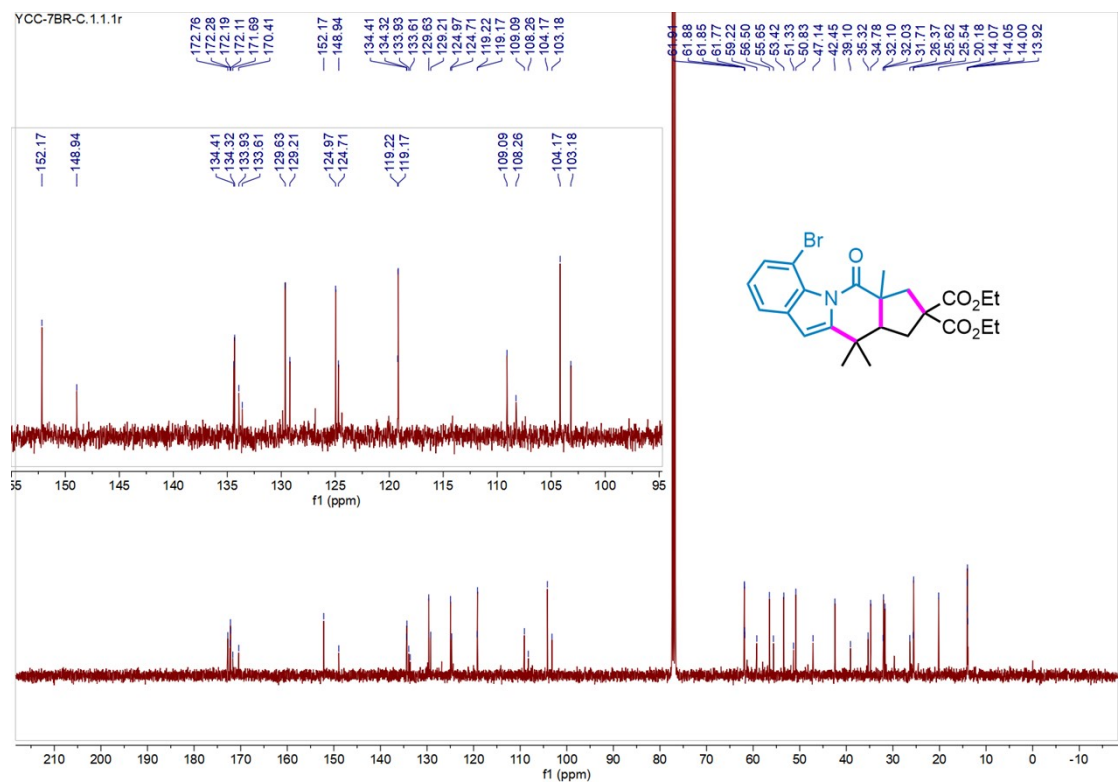

Diethyl 3a,10,11,11-tetramethyl-4-oxo-3a,4,11,11a-tetrahydro-1*H*-cyclopenta-[4,5]-pyrido[1,2-*a*]indole-2,2(3*H*)-dicarboxylate (**19**):

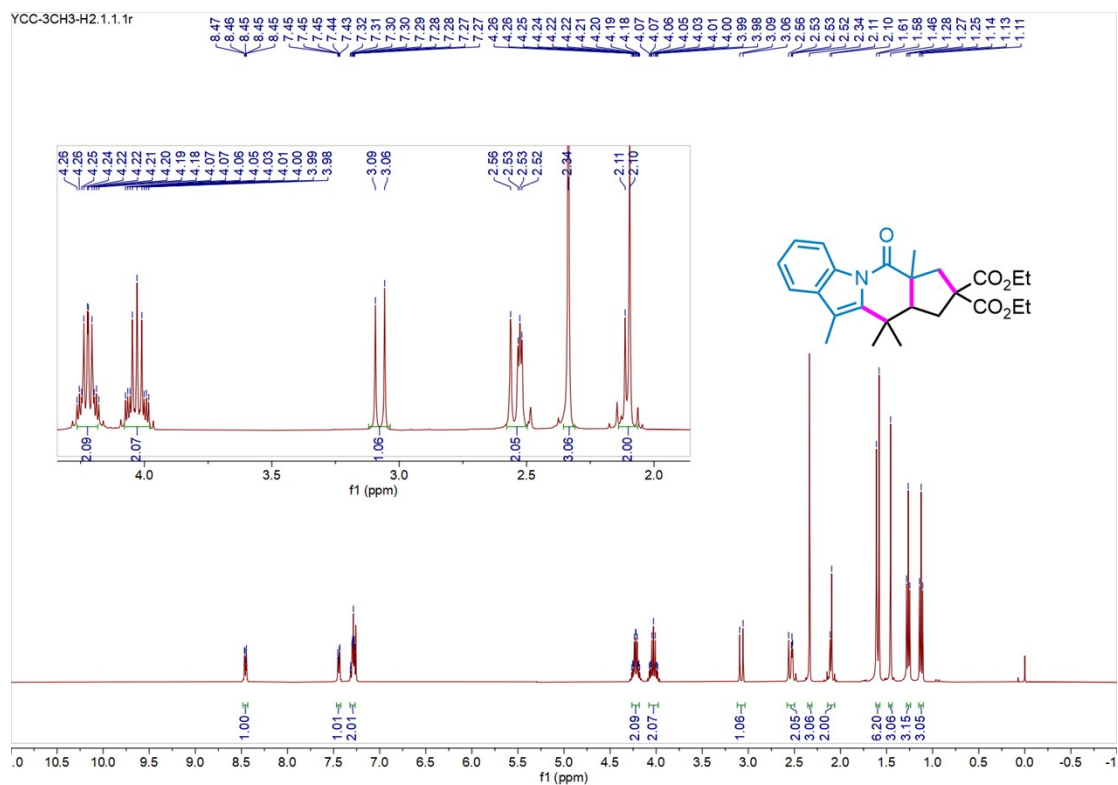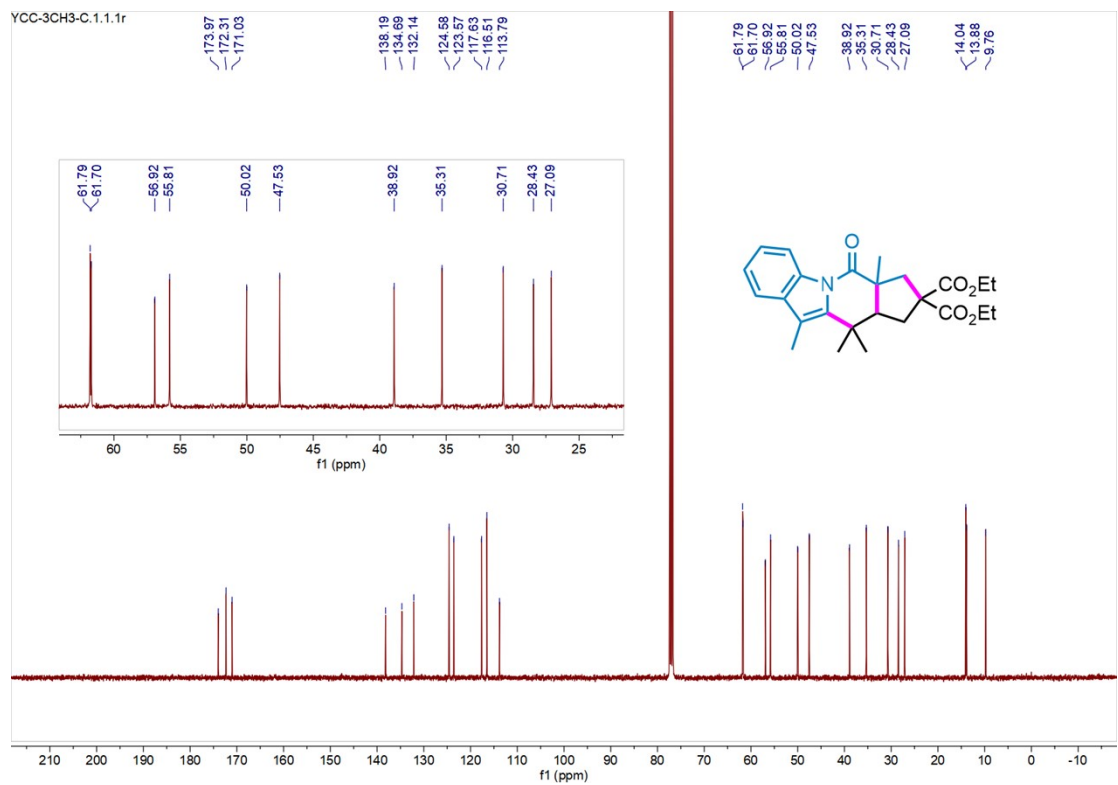

Chemical structure of compound 10 is shown on the right. The structure is a complex molecule featuring a benzimidazole core, a methyl ester group, and a side chain with two ethyl ester groups.

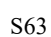

**Chemical Structure of Compound 10:**

CCOC(=O)C1(C)CC2C(C1)C(=O)N3C(=C(C=C3)C(=O)OCC)C2

**<sup>1</sup>H NMR Spectrum (CDCl<sub>3</sub>):**

| Chemical Shift (ppm) | Integration |
|----------------------|-------------|
| 7.28                 | 1.06        |
| 7.28                 | 7.28        |
| 5.03                 | 1.00        |
| 4.19                 | 3.12        |
| 4.16                 | 1.03        |
| 4.15                 | 2.04        |
| 4.14                 | 1.03        |
| 4.13                 | 1.03        |
| 4.12                 | 1.03        |
| 4.11                 | 1.03        |
| 4.09                 | 1.03        |
| 4.08                 | 1.03        |
| 4.07                 | 1.03        |
| 4.06                 | 1.03        |
| 4.05                 | 1.03        |
| 4.04                 | 1.03        |
| 4.03                 | 1.03        |
| 4.02                 | 1.03        |
| 4.01                 | 1.03        |
| 4.00                 | 1.03        |
| 3.99                 | 1.03        |
| 3.98                 | 1.03        |
| 3.97                 | 1.03        |
| 3.96                 | 1.03        |
| 3.95                 | 1.03        |
| 3.94                 | 1.03        |
| 3.93                 | 1.03        |
| 3.92                 | 1.03        |
| 3.91                 | 1.03        |
| 3.90                 | 1.03        |
| 3.89                 | 1.03        |
| 3.88                 | 1.03        |
| 3.87                 | 1.03        |
| 3.86                 | 1.03        |
| 3.85                 | 1.03        |
| 3.84                 | 1.03        |
| 3.83                 | 1.03        |
| 3.82                 | 1.03        |
| 3.81                 | 1.03        |
| 3.80                 | 1.03        |
| 3.79                 | 1.03        |
| 3.78                 | 1.03        |
| 3.77                 | 1.03        |
| 3.76                 | 1.03        |
| 3.75                 | 1.03        |
| 3.74                 | 1.03        |
| 3.73                 | 1.03        |
| 3.72                 | 1.03        |
| 3.71                 | 1.03        |
| 3.70                 | 1.03        |
| 3.69                 | 1.03        |
| 3.68                 | 1.03        |
| 3.67                 | 1.03        |
| 3.66                 | 1.03        |
| 3.65                 | 1.03        |
| 3.64                 | 1.03        |
| 3.63                 | 1.03        |
| 3.62                 | 1.03        |
| 3.61                 | 1.03        |
| 3.60                 | 1.03        |
| 3.59                 | 1.03        |
| 3.58                 | 1.03        |
| 3.57                 | 1.03        |
| 3.56                 | 1.03        |
| 3.55                 | 1.03        |
| 3.54                 | 1.03        |
| 3.53                 | 1.03        |
| 3.52                 | 1.03        |
| 3.51                 | 1.03        |
| 3.50                 | 1.03        |
| 3.49                 | 1.03        |
| 3.48                 | 1.03        |
| 3.47                 | 1.03        |
| 3.46                 | 1.03        |
| 3.45                 | 1.03        |
| 3.44                 | 1.03        |
| 3.43                 | 1.03        |
| 3.42                 | 1.03        |
| 3.41                 | 1.03        |
| 3.40                 | 1.03        |
| 3.39                 | 1.03        |
| 3.38                 | 1.03        |
| 3.37                 | 1.03        |
| 3.36                 | 1.03        |
| 3.35                 | 1.03        |
| 3.34                 | 1.03        |
| 3.33                 | 1.03        |
| 3.32                 | 1.03        |
| 3.31                 | 1.03        |
| 3.30                 | 1.03        |
| 3.29                 | 1.03        |
| 3.28                 | 1.03        |
| 3.27                 | 1.03        |
| 3.26                 | 1.03        |
| 3.25                 | 1.03        |
| 3.24                 | 1.03        |
| 3.23                 | 1.03        |
| 3.22                 | 1.03        |
| 3.21                 | 1.03        |
| 3.20                 | 1.03        |
| 3.19                 | 1.03        |
| 3.18                 | 1.03        |
| 3.17                 | 1.03        |
| 3.16                 | 1.03        |
| 3.15                 | 1.03        |
| 3.14                 | 1.03        |
| 3.13                 | 1.03        |
| 3.12                 | 1.03        |
| 3.11                 | 1.03        |
| 3.10                 | 1.03        |
| 3.09                 | 1.03        |
| 3.08                 | 1.03        |
| 3.07                 | 1.03        |
| 3.06                 | 1.03        |
| 3.05                 | 1.03        |
| 3.04                 | 1.03        |
| 3.03                 | 1.03        |
| 3.02                 | 1.03        |
| 3.01                 | 1.03        |
| 3.00                 | 1.03        |
| 2.99                 | 1.03        |
| 2.98                 | 1.03        |
| 2.97                 | 1.03        |
| 2.96                 | 1.03        |
| 2.95                 | 1.03        |
| 2.94                 | 1.03        |
| 2.93                 | 1.03        |
| 2.92                 | 1.03        |
| 2.91                 | 1.03        |
| 2.90                 | 1.03        |
| 2.89                 | 1.03        |
| 2.88                 | 1.03        |
| 2.87                 | 1.03        |
| 2.86                 | 1.03        |
| 2.85                 | 1.03        |
| 2.84                 | 1.03        |
| 2.83                 | 1.03        |
| 2.82                 | 1.03        |
| 2.81                 | 1.03        |
| 2.80                 | 1.03        |
| 2.79                 | 1.03        |
| 2.78                 | 1.03        |
| 2.77                 | 1.03        |
| 2.76                 | 1.03        |
| 2.75                 | 1.03        |
| 2.74                 | 1.03        |
| 2.73                 | 1.03        |
| 2.72                 | 1.03        |
| 2.71                 | 1.03        |
| 2.70                 | 1.03        |
| 2.69                 | 1.03        |
| 2.68                 | 1.03        |
| 2.67                 | 1.03        |
| 2.66                 | 1.03        |
| 2.65                 | 1.03        |
| 2.64                 | 1.03        |
| 2.63                 | 1.03        |
| 2.62                 | 1.03        |
| 2.61                 | 1.03        |
| 2.60                 | 1.03        |
| 2.59                 | 1.03        |
| 2.58                 | 1.03        |
| 2.57                 | 1.03        |
| 2.56                 | 1.03        |
| 2.55                 | 1.03        |
| 2.54                 | 1.03        |
| 2.53                 | 1.03        |
| 2.52                 | 1.03        |
| 2.51                 | 1.03        |
| 2.50                 | 1.03        |
| 2.49                 | 1.03        |
| 2.48                 | 1.03        |
| 2.47                 | 1.03        |
| 2.46                 | 1.03        |
| 2.45                 | 1.03        |
| 2.44                 | 1.03        |
| 2.43                 | 1.03        |
| 2.42                 | 1.03        |
|                      |             |

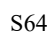

Diethyl 8-methoxy-10-(2-methoxy-2-oxoethyl)-3a,11,11-trimethyl-4-oxo-3a,4,11,11a-tetrahydro-1*H*-cyclopenta[4,5]pyrido[1,2-*a*]indole-2,2(3*H*)-dicarboxylate (**22**):

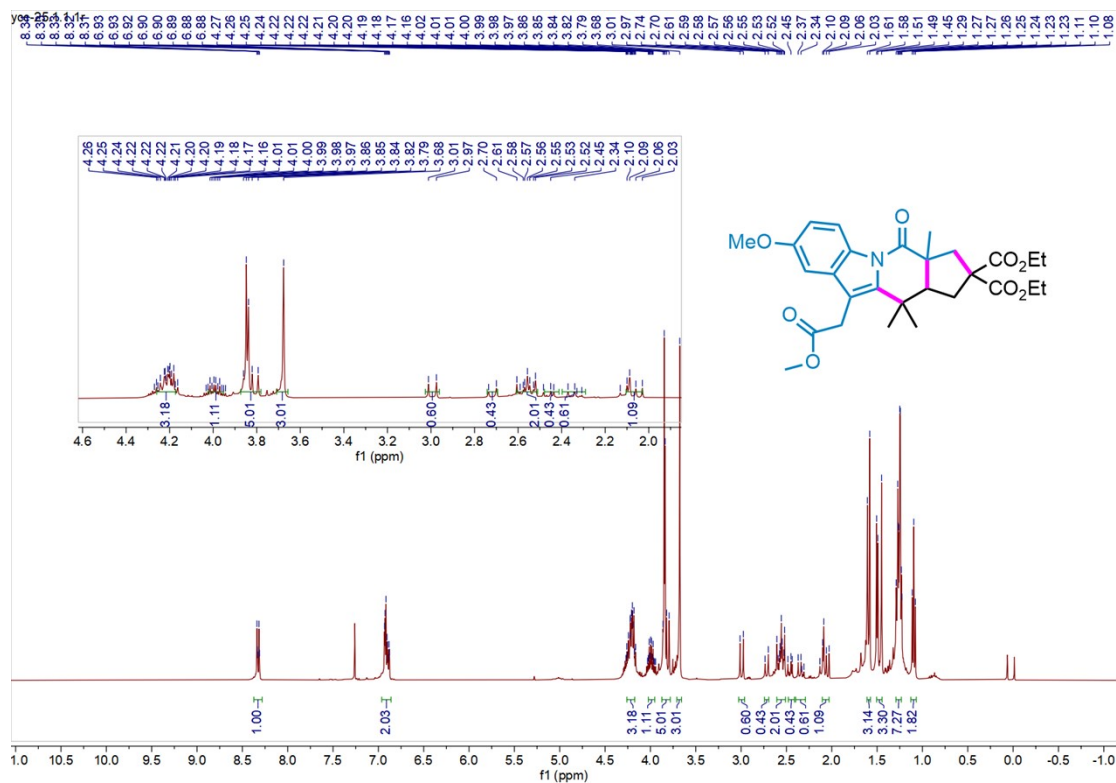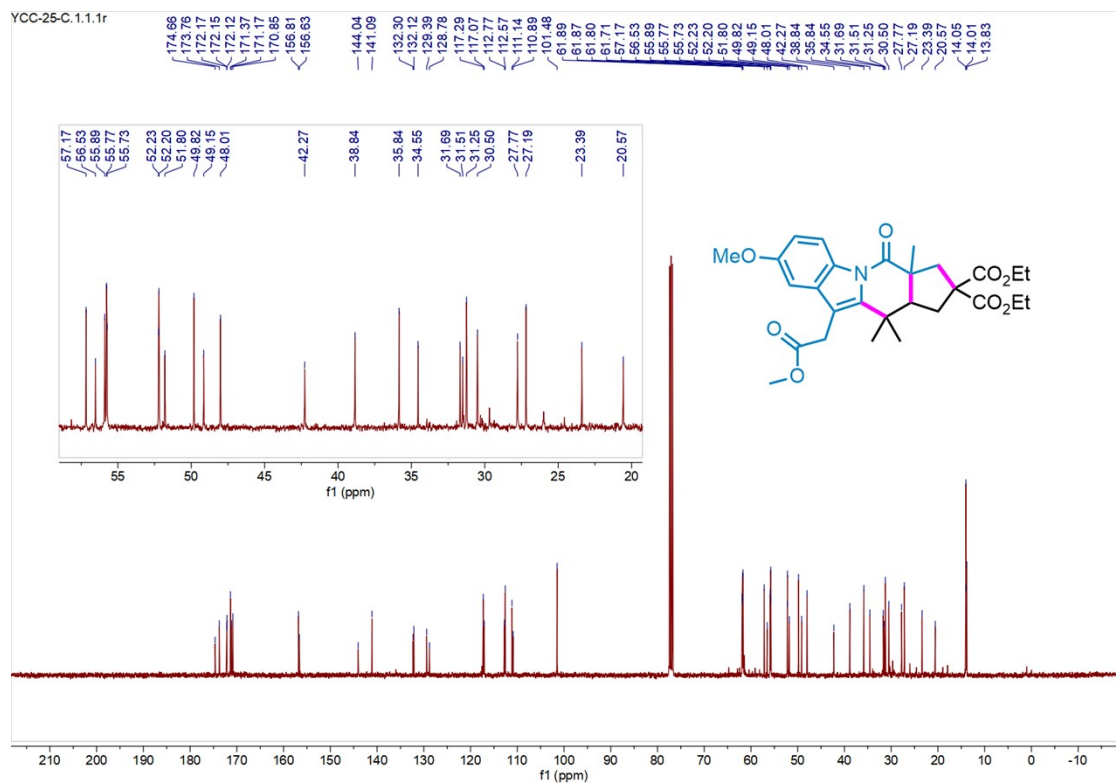

Chemical structure of compound 10: CC1(C)C(C(=O)OCC)C(C(=O)OCC)C2=C1C(=C(C=C2)C(=O)OCC)C3=CC=C(C=C3)OC

<sup>1</sup>H NMR spectrum (CDCl<sub>3</sub>) of compound 10. The spectrum shows peaks from 0 to 8 ppm. Integration values are provided below the baseline.

| Chemical Shift (ppm) | Integration |
|----------------------|-------------|
| 7.35                 | 1.00        |
| 7.28                 | 5.07        |
| 7.22                 | 2.03        |
| 7.15                 | 2.08        |
| 7.08                 | 3.10        |
| 7.02                 | 2.14        |
| 6.95                 | 1.52        |
| 6.88                 | 0.52        |
| 6.82                 | 0.54        |
| 6.75                 | 0.58        |
| 6.68                 | 1.13        |
| 6.62                 | 3.12        |
| 6.55                 | 3.07        |
| 6.48                 | 1.56        |
| 6.42                 | 0.52        |
| 6.35                 | 0.54        |
| 6.28                 | 0.58        |
| 6.22                 | 1.13        |
| 6.15                 | 3.12        |
| 6.08                 | 3.07        |
| 6.02                 | 1.56        |
| 5.95                 | 0.52        |
| 5.88                 | 0.54        |
| 5.82                 | 0.58        |
| 5.75                 | 1.13        |
| 5.68                 | 3.12        |
| 5.62                 | 3.07        |
| 5.55                 | 1.56        |
| 5.48                 | 0.52        |
| 5.42                 | 0.54        |
| 5.35                 | 0.58        |
| 5.28                 | 1.13        |
| 5.22                 | 3.12        |
| 5.15                 | 3.07        |
| 5.08                 | 1.56        |
| 5.02                 | 0.52        |
| 4.95                 | 0.54        |
| 4.88                 | 0.58        |
| 4.82                 | 1.13        |
| 4.75                 | 3.12        |
| 4.68                 | 3.07        |
| 4.62                 | 1.56        |
| 4.55                 | 0.52        |
| 4.48                 | 0.54        |
| 4.42                 | 0.58        |
| 4.35                 | 1.13        |
| 4.28                 | 3.12        |
| 4.22                 | 3.07        |
| 4.15                 | 1.56        |
| 4.08                 | 0.52        |
| 4.02                 | 0.54        |
| 3.95                 | 0.58        |
| 3.88                 | 1.13        |
| 3.82                 | 3.12        |
| 3.75                 | 3.07        |
| 3.68                 | 1.56        |
| 3.62                 | 0.52        |
| 3.55                 | 0.54        |
| 3.48                 | 0.58        |
| 3.42                 | 1.13        |
| 3.35                 | 3.12        |
| 3.28                 | 3.07        |
| 3.22                 | 1.56        |
| 3.15                 | 0.52        |
| 3.08                 | 0.54        |
| 3.02                 | 0.58        |
| 2.95                 | 1.13        |
| 2.88                 | 3.12        |
| 2.82                 | 3.07        |
| 2.75                 | 1.56        |
| 2.68                 | 0.52        |
| 2.62                 | 0.54        |
| 2.55                 | 0.58        |
| 2.48                 | 1.13        |
| 2.42                 | 3.12        |
| 2.35                 | 3.07        |
| 2.28                 | 1.56        |
| 2.22                 | 0.52        |
| 2.15                 | 0.54        |
| 2.08                 | 0.58        |
| 2.02                 | 1.13        |
| 1.95                 | 3.12        |
| 1.88                 | 3.07        |
| 1.82                 | 1.56        |
| 1.75                 | 0.52        |
| 1.68                 | 0.54        |
| 1.62                 | 0.58        |
| 1.55                 | 1.13        |
| 1.48                 | 3.12        |
| 1.42                 | 3.07        |
| 1.35                 | 1.56        |
| 1.28                 | 0.52        |
| 1.22                 | 0.54        |
| 1.15                 | 0.58        |
| 1.08                 | 1.13        |
| 1.02                 | 3.12        |
| 0.95                 | 3.07        |
| 0.88                 | 1.56        |
| 0.82                 | 0.52        |
| 0.75                 | 0.54        |
| 0.68                 | 0.58        |
| 0.62                 | 1.13        |
| 0.55                 | 3.12        |
| 0.48                 | 3.07        |
| 0.42                 | 1.56        |
| 0.35                 | 0.52        |
| 0.28                 | 0.54        |
| 0.22                 | 0.58        |
| 0.15                 | 1.13        |
| 0.08                 | 3.12        |
| 0.02                 | 3.07        |

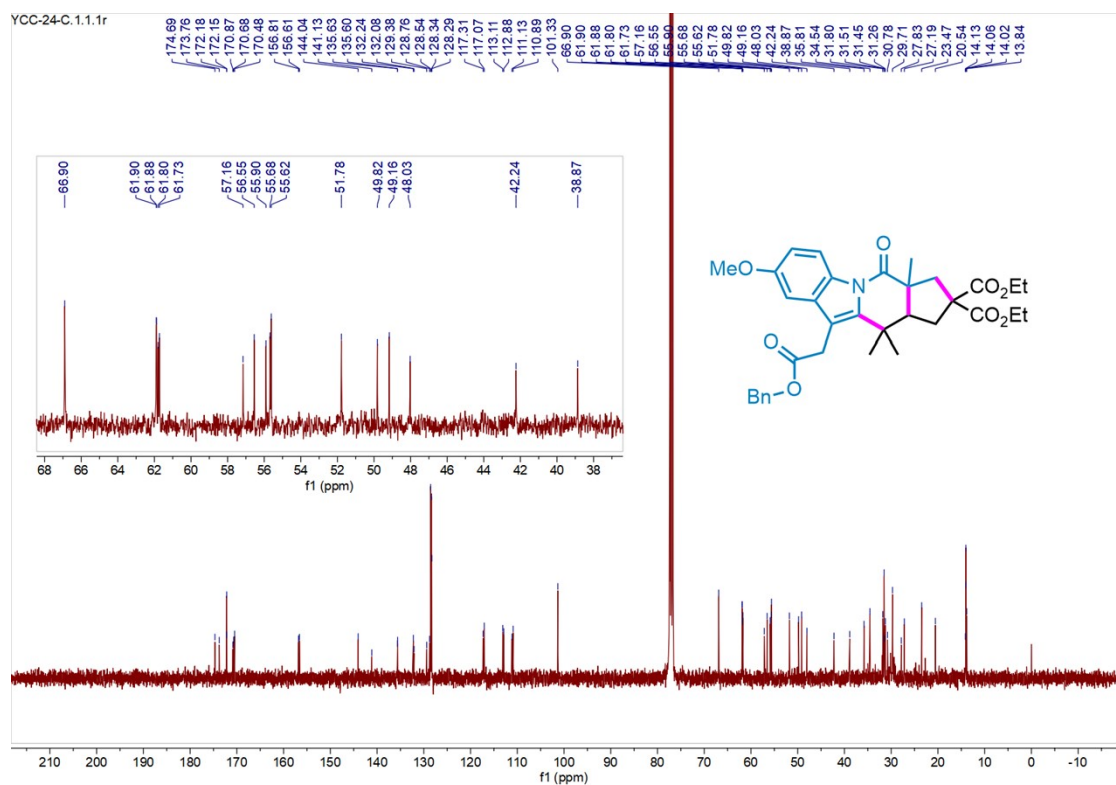

**Chemical Structure of Compound 10:**

CCOC(=O)[C@H]1CC[C@@H]2[C@@H](C(C)(C)C)[C@H](C1)c3c(nc4cc(OC)ccc4n3C#N)C2

**<sup>1</sup>H NMR Spectrum (CDCl<sub>3</sub>):**

**Peak Data (ppm, Integration):**

| Chemical Shift (ppm) | Integration |
|----------------------|-------------|
| 1.12                 | 1.00        |
| 1.14                 | 2.08        |
| 1.25                 | 1.00        |
| 1.27                 | 2.08        |
| 1.32                 | 1.00        |
| 1.55                 | 1.00        |
| 1.60                 | 2.08        |
| 2.03                 | 1.00        |
| 2.07                 | 2.08        |
| 2.10                 | 1.00        |
| 2.13                 | 2.08        |
| 2.14                 | 1.00        |
| 2.17                 | 2.08        |
| 2.20                 | 1.00        |
| 2.23                 | 2.08        |
| 2.26                 | 1.00        |
| 2.29                 | 2.08        |
| 2.36                 | 1.00        |
| 2.39                 | 2.08        |
| 2.45                 | 1.00        |
| 2.46                 | 2.08        |
| 2.50                 | 1.00        |
| 2.56                 | 2.08        |
| 2.60                 | 1.00        |
| 2.63                 | 2.08        |
| 2.72                 | 1.00        |
| 2.75                 | 2.08        |
| 2.81                 | 1.00        |
| 2.89                 | 2.08        |
| 3.03                 | 1.00        |
| 3.07                 | 2.08        |
| 3.89                 | 1.00        |
| 3.98                 | 2.08        |
| 4.04                 | 1.00        |
| 4.06                 | 2.08        |
| 4.18                 | 1.00        |
| 4.19                 | 2.08        |
| 4.21                 | 1.00        |
| 4.22                 | 2.08        |
| 4.24                 | 1.00        |
| 4.26                 | 2.08        |
| 4.28                 | 1.00        |
| 4.34                 | 2.08        |
| 4.36                 | 1.00        |
| 4.38                 | 2.08        |
| 4.42                 | 1.00        |
| 4.44                 | 2.08        |
| 4.46                 | 1.00        |
| 4.48                 | 2.08        |
| 4.50                 | 1.00        |
| 4.52                 | 2.08        |
| 4.54                 | 1.00        |
| 4.56                 | 2.08        |
| 4.58                 | 1.00        |
| 4.60                 | 2.08        |
| 4.62                 | 1.00        |
| 4.64                 | 2.08        |
| 4.66                 | 1.00        |
| 4.68                 | 2.08        |
| 4.70                 | 1.00        |
| 4.72                 | 2.08        |
| 4.74                 | 1.00        |
| 4.76                 | 2.08        |
| 4.78                 | 1.00        |
| 4.80                 | 2.08        |
| 4.82                 | 1.00        |
| 4.84                 | 2.08        |
| 4.86                 | 1.00        |
| 4.88                 | 2.08        |
| 4.90                 | 1.00        |
| 4.92                 | 2.08        |
| 4.94                 | 1.00        |
| 4.96                 | 2.08        |
| 4.98                 | 1.00        |
| 5.00                 | 2.08        |
| 5.02                 | 1.00        |
| 5.04                 | 2.08        |
| 5.06                 | 1.00        |
| 5.08                 | 2.08        |
| 5.10                 | 1.00        |
| 5.12                 | 2.08        |
| 5.14                 | 1.00        |
| 5.16                 | 2.08        |
| 5.18                 | 1.00        |
| 5.20                 | 2.08        |
| 5.22                 | 1.00        |
| 5.24                 | 2.08        |
| 5.26                 | 1.00        |
| 5.28                 | 2.08        |
| 5.30                 | 1.00        |
| 5.32                 | 2.08        |
| 5.34                 | 1.00        |
| 5.36                 | 2.08        |
| 5.38                 | 1.00        |
| 5.40                 | 2.08        |
| 5.42                 | 1.00        |
| 5.44                 | 2.08        |
| 5.46                 | 1.00        |
| 5.48                 | 2.08        |
| 5.50                 | 1.00        |
| 5.52                 | 2.08        |
| 5.54                 | 1.00        |
| 5.56                 | 2.08        |
| 5.58                 | 1.00        |
| 5.60                 | 2.08        |
| 5.62                 | 1.00        |
| 5.64                 | 2.08        |
| 5.66                 | 1.00        |
| 5.68                 | 2.08        |
| 5.70                 | 1.00        |
| 5.72                 | 2.08        |
| 5.74                 | 1.00        |
| 5.76                 | 2.08        |
| 5.78                 | 1.00        |
| 5.80                 | 2.08        |
| 5.82                 | 1.00        |
| 5.84                 | 2.08        |
| 5.86                 | 1.00        |
| 5.88                 | 2.08        |
| 5.90                 | 1.00        |
| 5.92                 | 2.08        |
| 5.94                 | 1.00        |
| 5.96                 | 2.08        |
| 5.98                 | 1.00        |
| 6.00                 | 2.08        |
| 6.02                 | 1.00        |
| 6.04                 | 2.08        |
| 6.06                 | 1.00        |
| 6.08                 | 2.08        |
| 6.10                 | 1.00        |
| 6.12                 | 2.08        |
| 6.14                 | 1.00        |
| 6.16                 | 2.08        |
| 6.18                 | 1.00        |
| 6.20                 | 2.08        |
| 6.22                 | 1.00        |
| 6.24                 | 2.08        |
| 6.26                 | 1.00        |
| 6.28                 | 2.08        |
| 6.30                 | 1.00        |
| 6.32                 | 2.08        |
| 6.34                 | 1.00        |
| 6.36                 | 2.08        |
| 6.38                 | 1.00        |
| 6.40                 | 2.08        |
| 6.42                 | 1.00        |
| 6.44                 | 2.08        |
| 6.46                 | 1.00        |
| 6.48                 | 2.08        |
| 6.50                 | 1.00        |
| 6.52                 | 2.08        |
| 6.54                 | 1.00        |
| 6.56                 | 2.08        |
| 6.58                 | 1.00        |
| 6.60                 | 2.08        |
| 6.62                 | 1.00        |
| 6.64                 | 2.08        |
| 6.66                 | 1.00        |
| 6.68                 | 2.08        |
| 6.70                 | 1.00        |
| 6.72                 | 2.08        |
| 6.74                 | 1.00        |
| 6.76                 | 2.08        |
| 6.78                 | 1.00        |
| 6.80                 | 2.08        |
| 6.82                 | 1.00        |
| 6.84                 | 2.08        |
| 6.86                 | 1.00        |
| 6.88                 | 2.08        |
| 6.90                 | 1.00        |
| 6.92                 | 2.08        |
| 6.94                 | 1.00        |
| 6.96                 | 2.08        |
| 6.98                 | 1.00        |
| 7.00                 | 2.08        |
|                      |             |

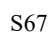

Diethyl 10-(2-((*tert*-butoxycarbonyl)amino)-3-methoxy-3-oxopropyl)-3a,11,11-trimethyl-4-oxo-3a,4,11,11a-tetrahydro-1*H*-cyclopenta[4,5]pyrido[1,2-*a*]indole-2,2(3*H*)-dicarboxylate (**25**):

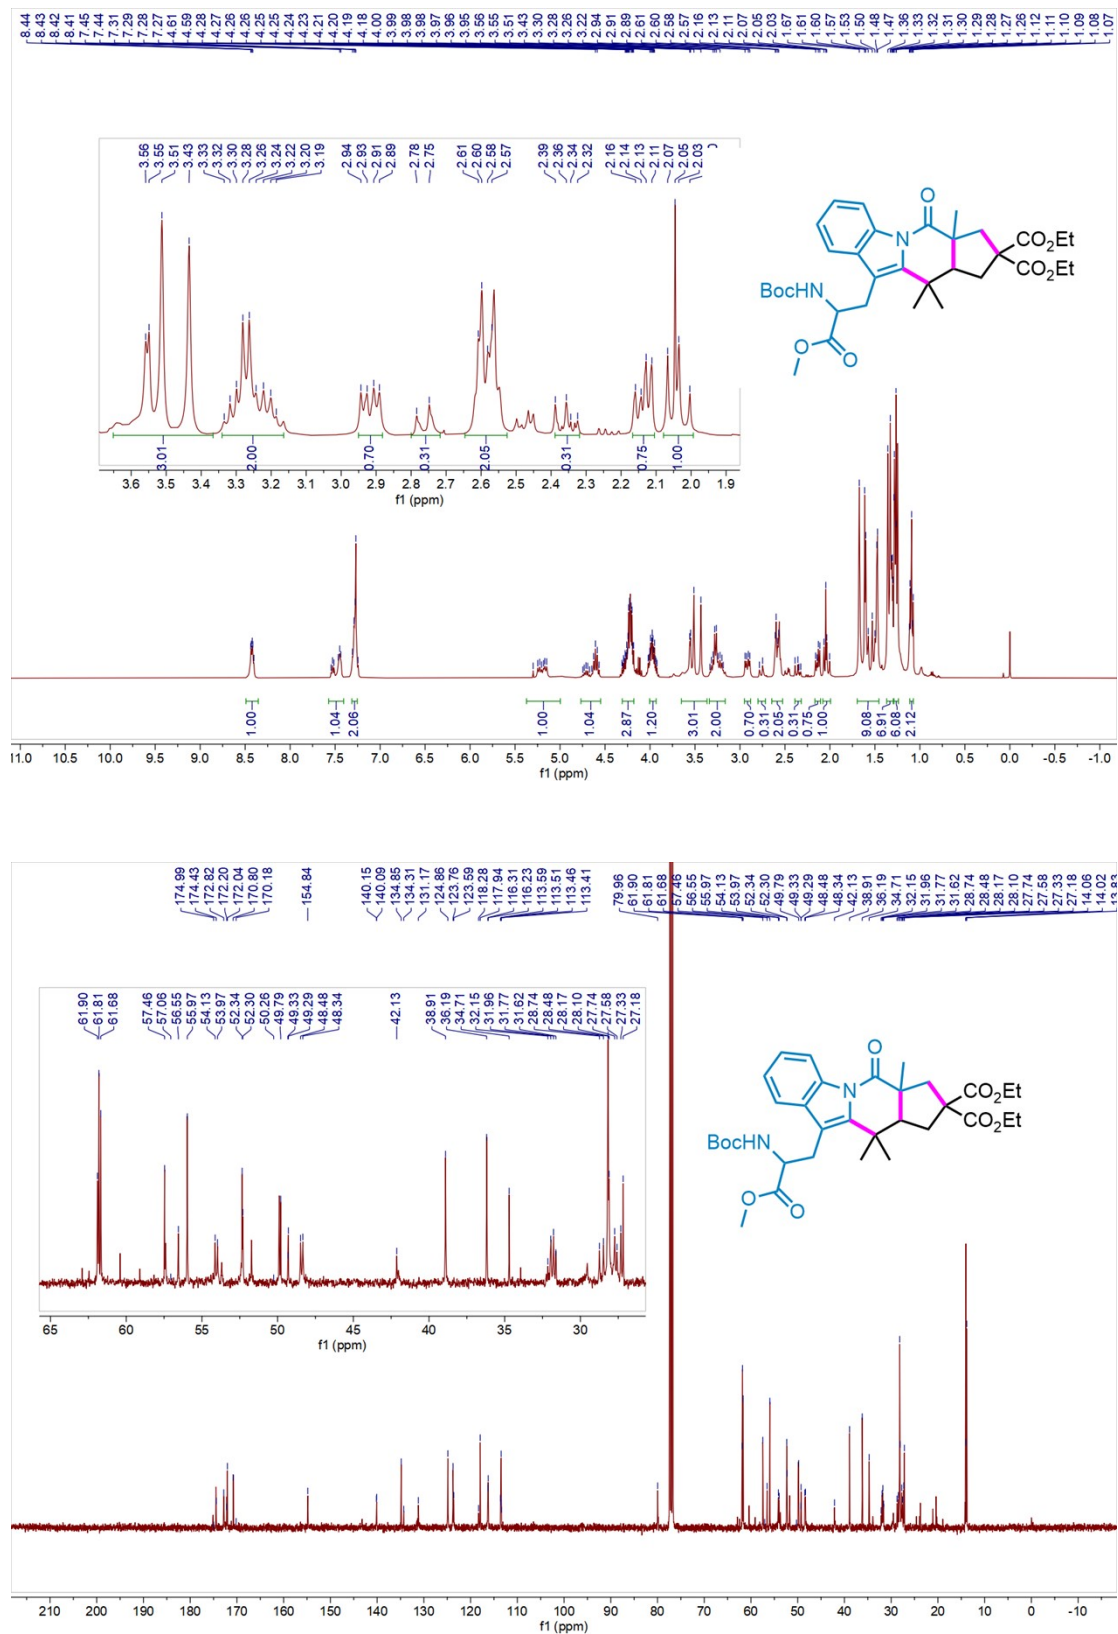

Diethyl 10-(3-(benzyloxy)-2-((*tert*-butoxycarbonyl)amino)-3-oxopropyl)-3a,11,11-trimethyl-4-oxo-3a,4,11,11a-tetrahydro-1*H*-cyclopenta[4,5]pyrido[1,2-*a*]indole-2,2(3*H*)-dicarboxylate (**26**):

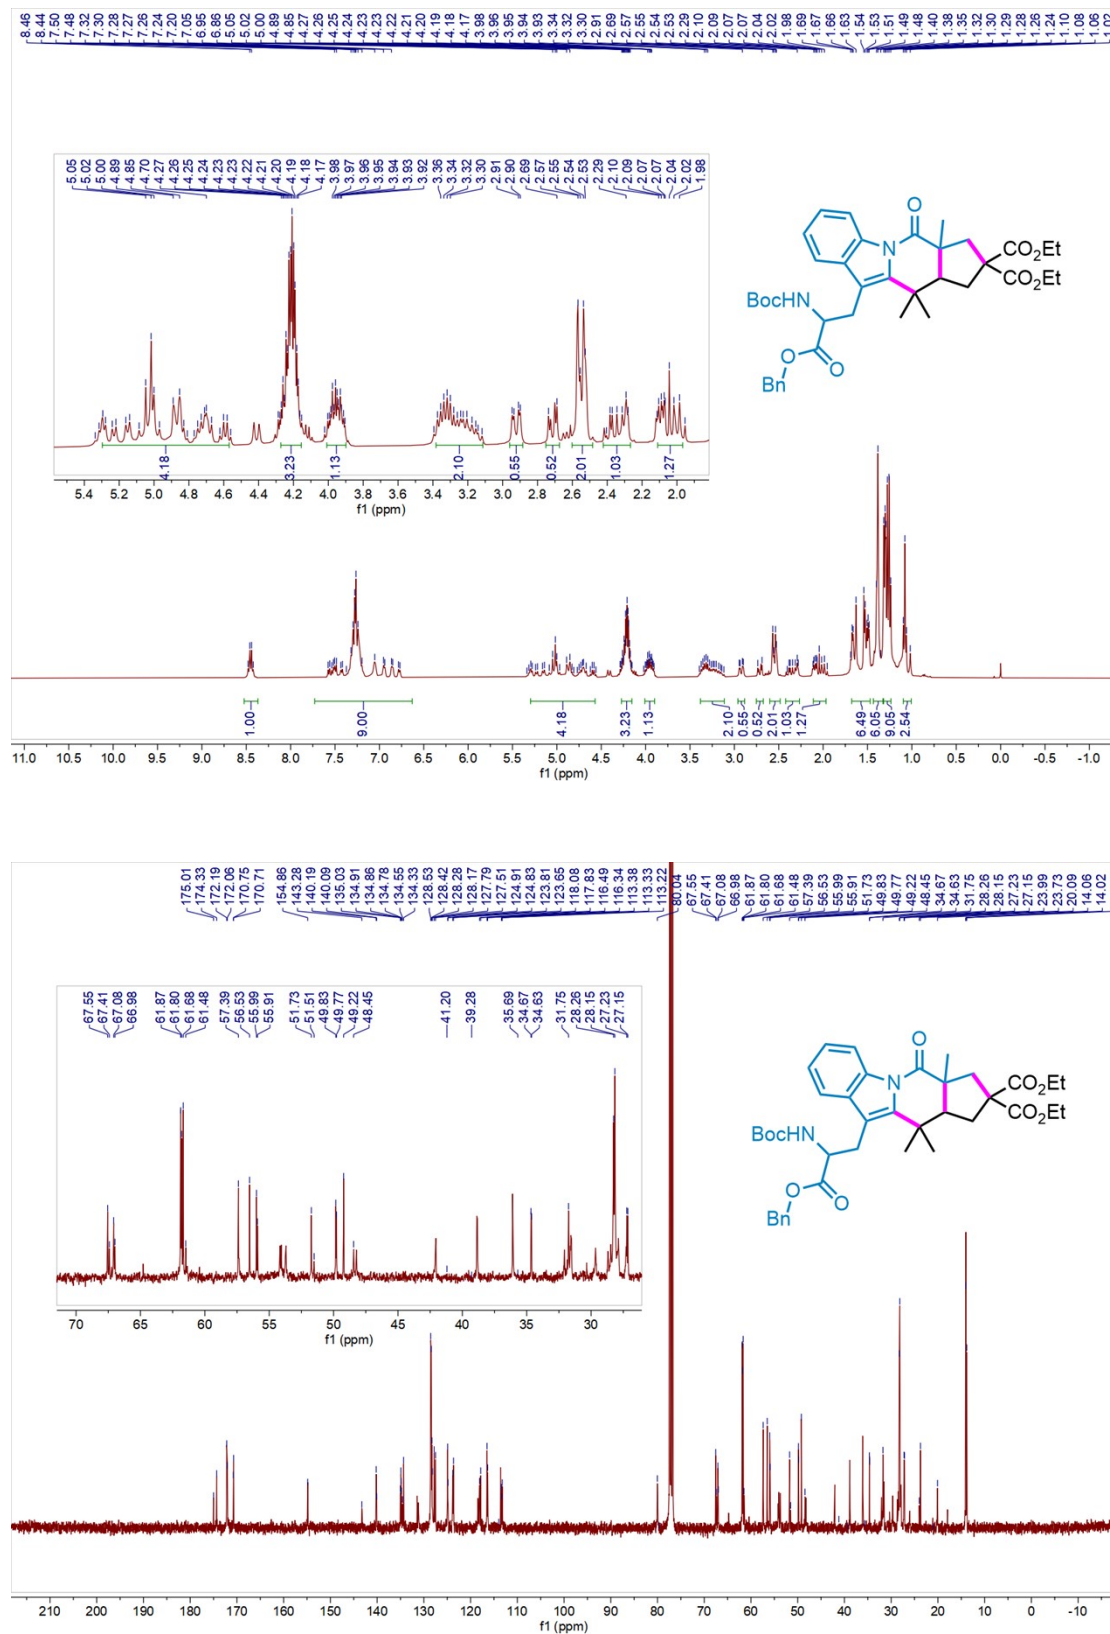

Diethyl 5a,9,9-trimethyl-5-oxo-5a,6,8a,9-tetrahydro-5H-cyclopenta[f]indolizine-7,7(8H)-dicarboxylate (**27**):

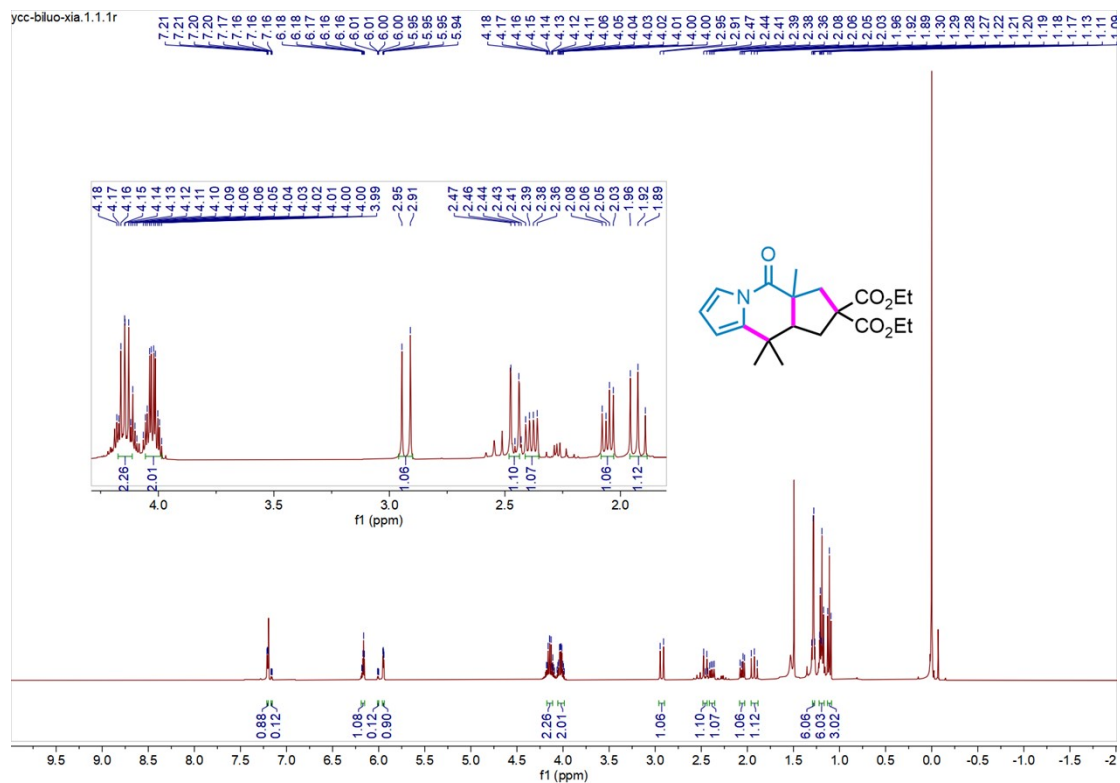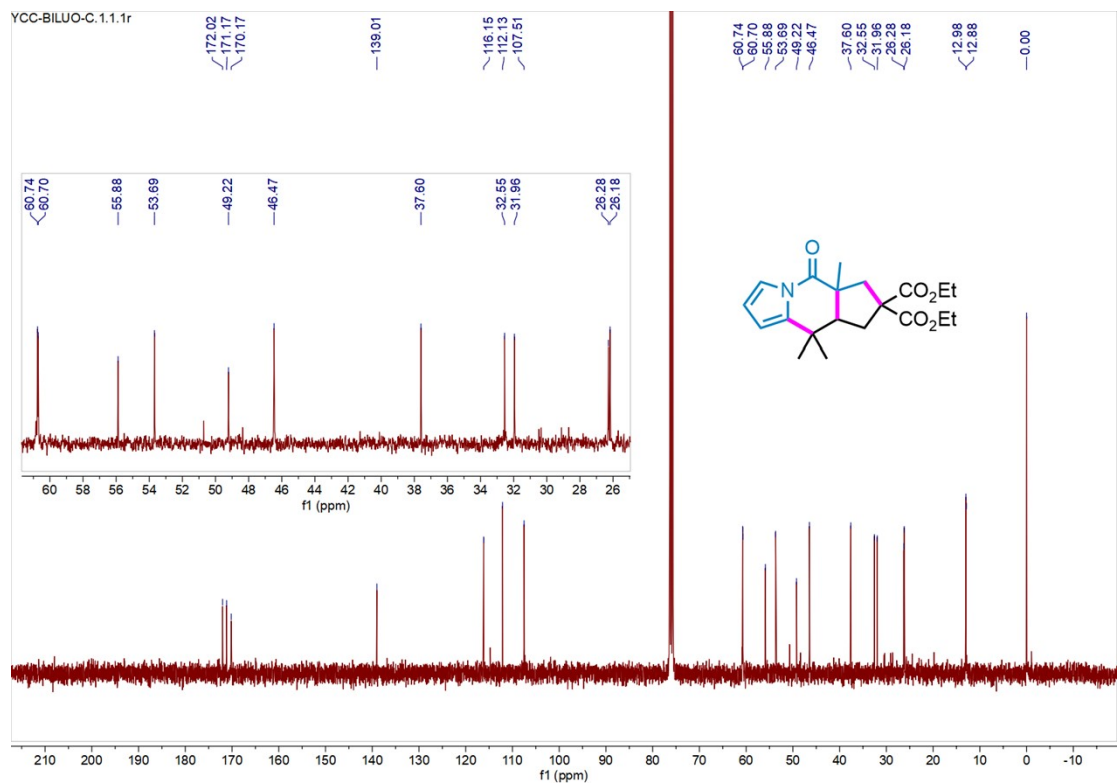

Dimethyl 8-methoxy-3a,11,11-trimethyl-4-oxo-3a,4,11,11a-tetrahydro-1*H*-cyclopenta-[4,5]-pyrido[1,2-*a*]indole-2,2(3*H*)-dicarboxylate (**28**):

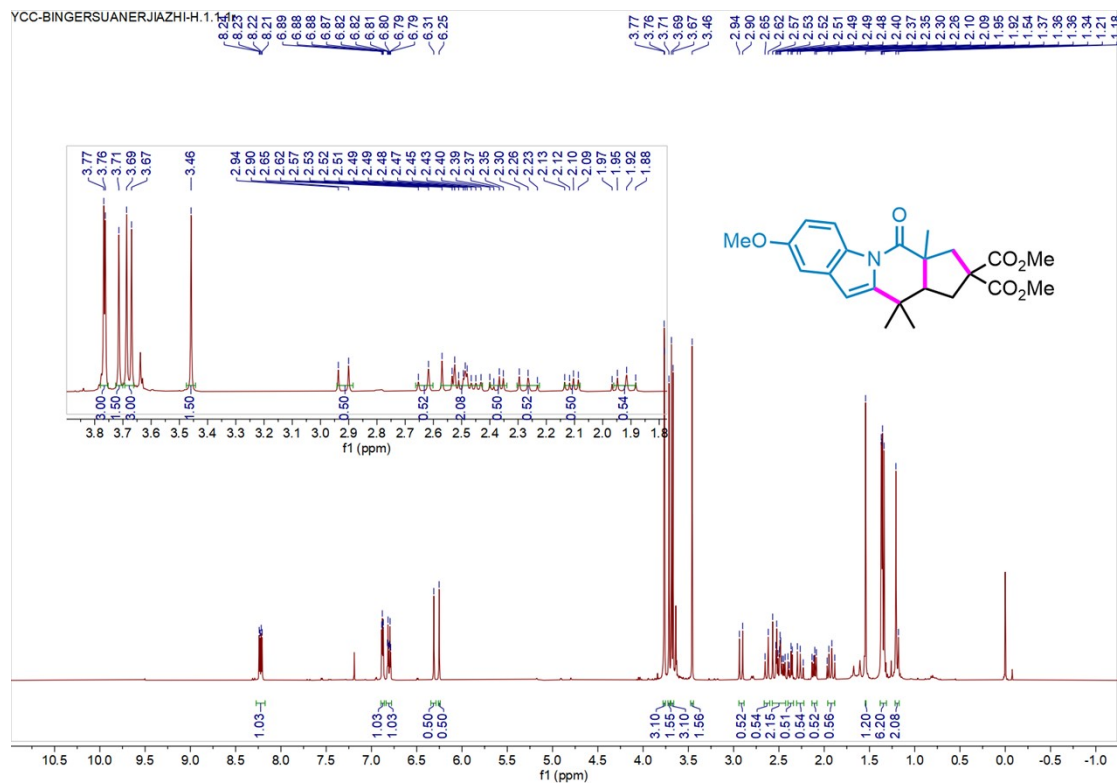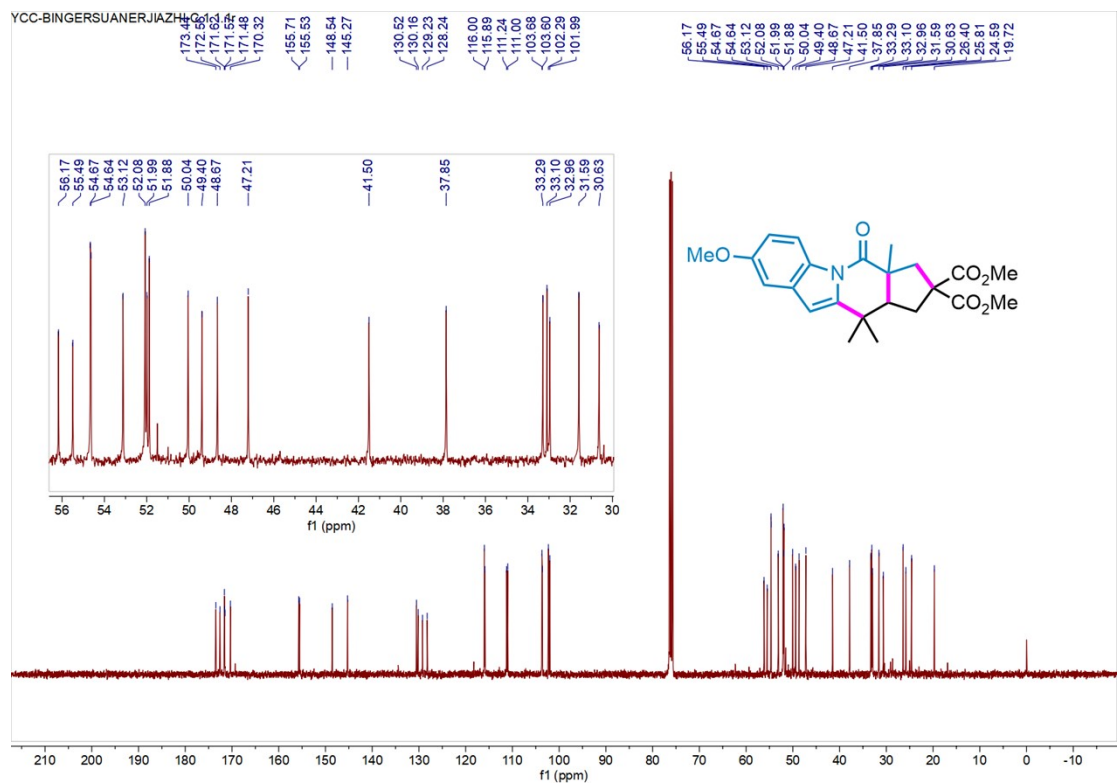

2-Benzyl 2-methyl 8-methoxy-3a,11,11-trimethyl-4-oxo-3a,4,11,11a-tetrahydro-1*H*-cyclopenta[4,5]pyrido[1,2-*a*]indole-2,2(3*H*)-dicarboxylate (**29**):

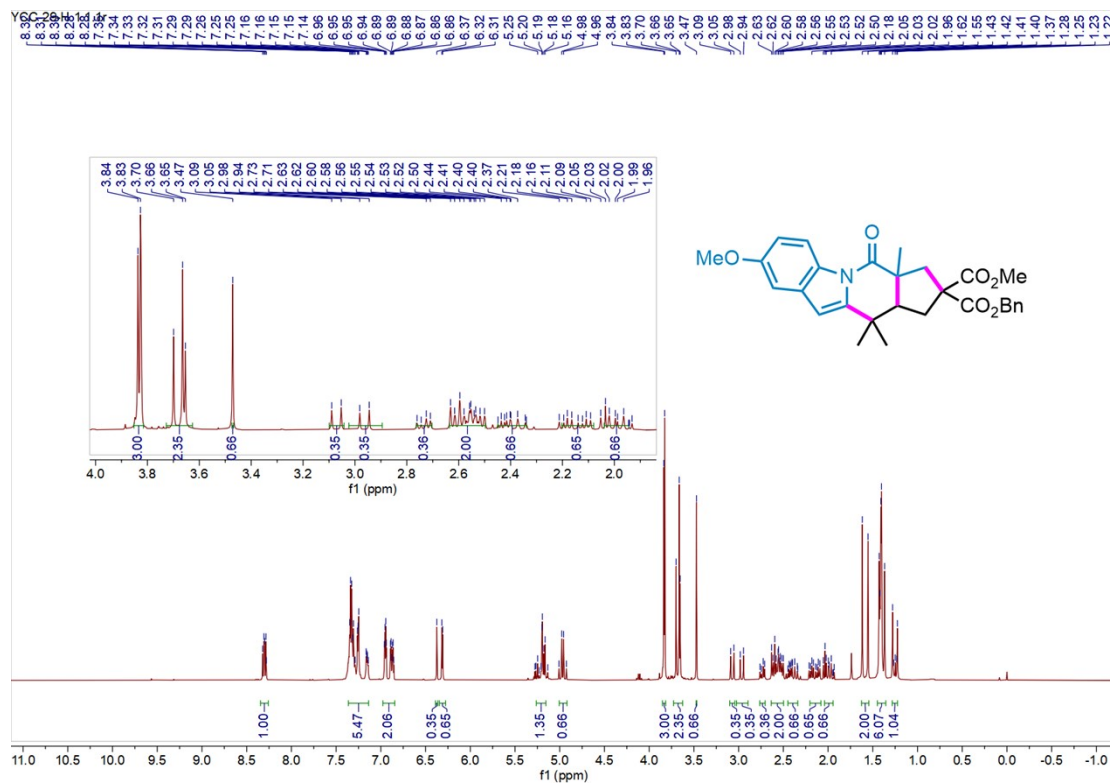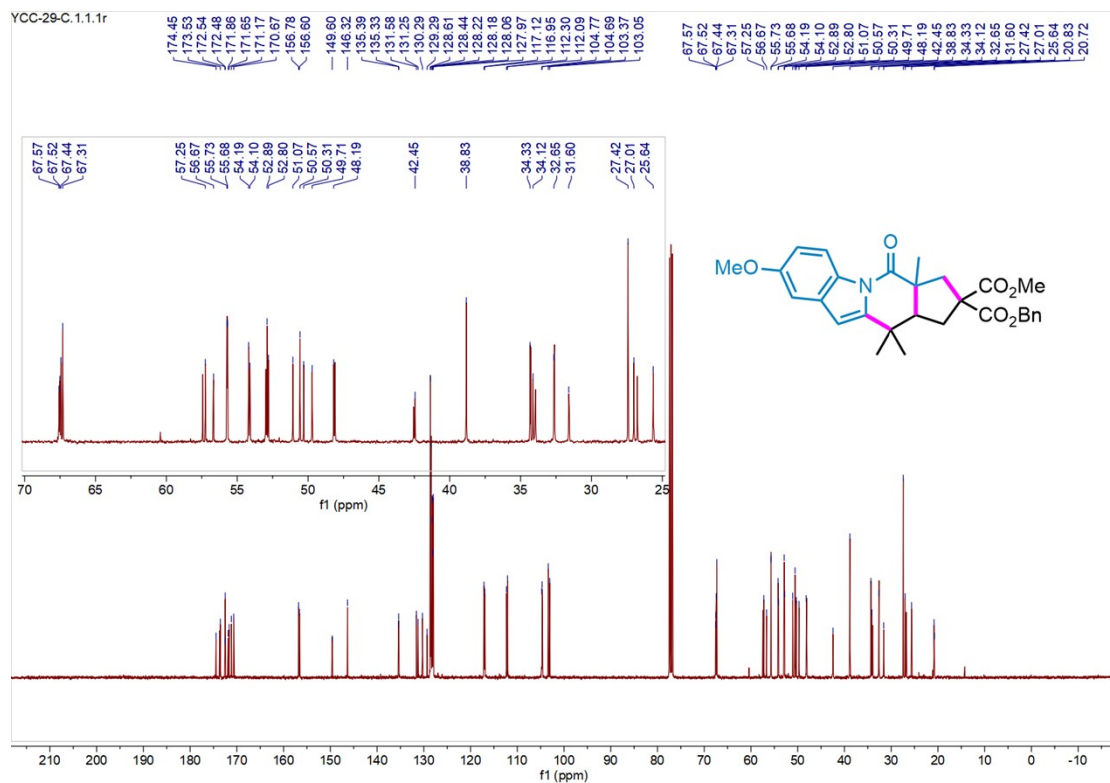

Ethyl (2*S*,3*aR*,11*aS*)-2-acetyl-8-methoxy-3*a*,11,11-trimethyl-4-oxo-2,3,3*a*,4,11,11*a*-hexahydro-1*H*-cyclopenta[4,5]pyrido[1,2-*a*]indole-2-carboxylate (**30**):

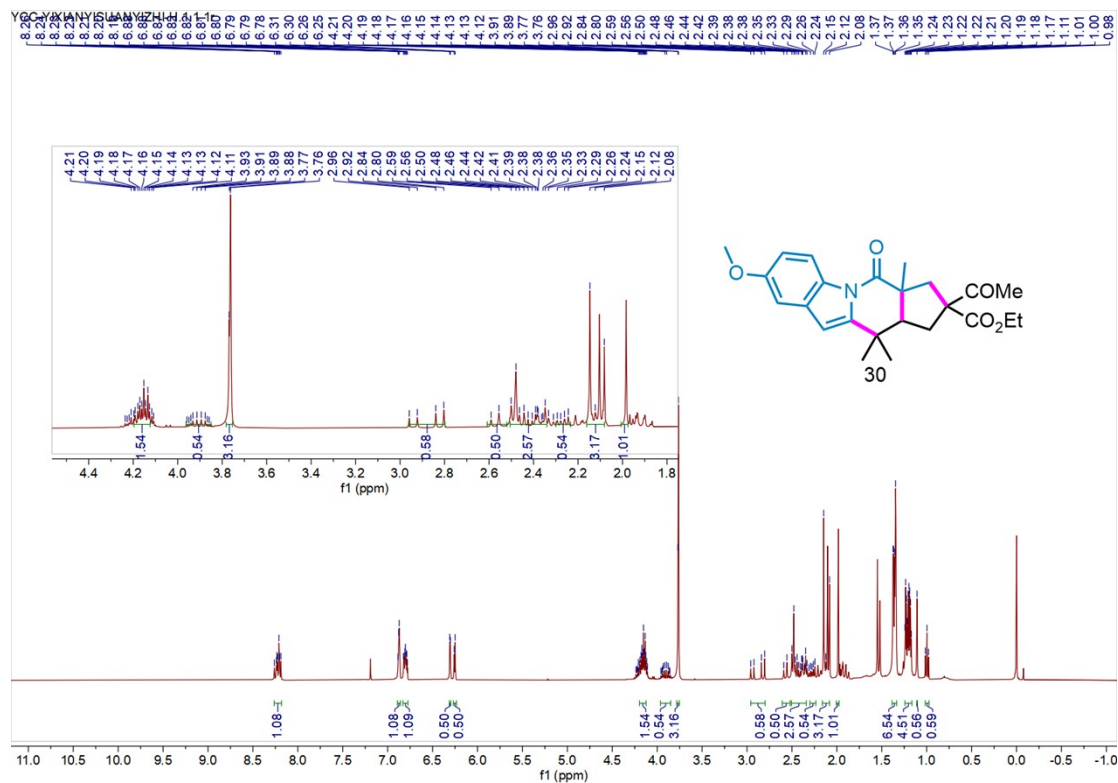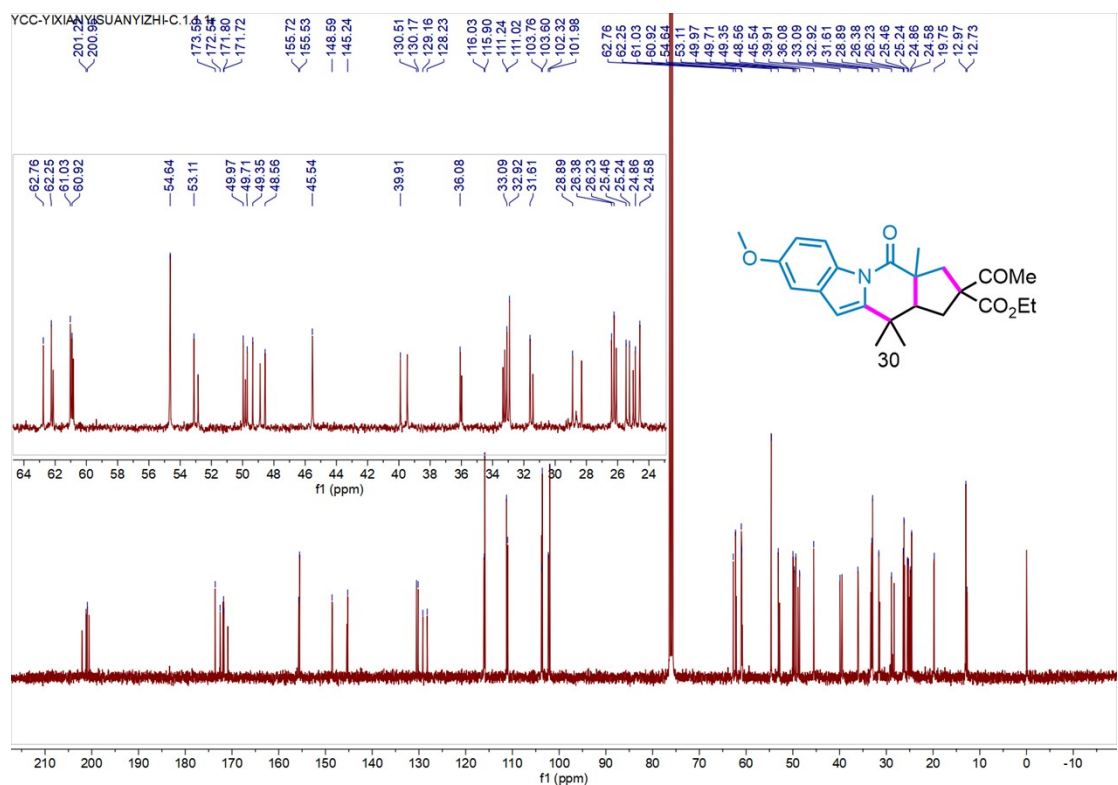

Diethyl 2-(3,5-di-*tert*-butyl-4-hydroxybenzyl)-2-(3-methylbut-2-en-1-yl)malonate  
(31):

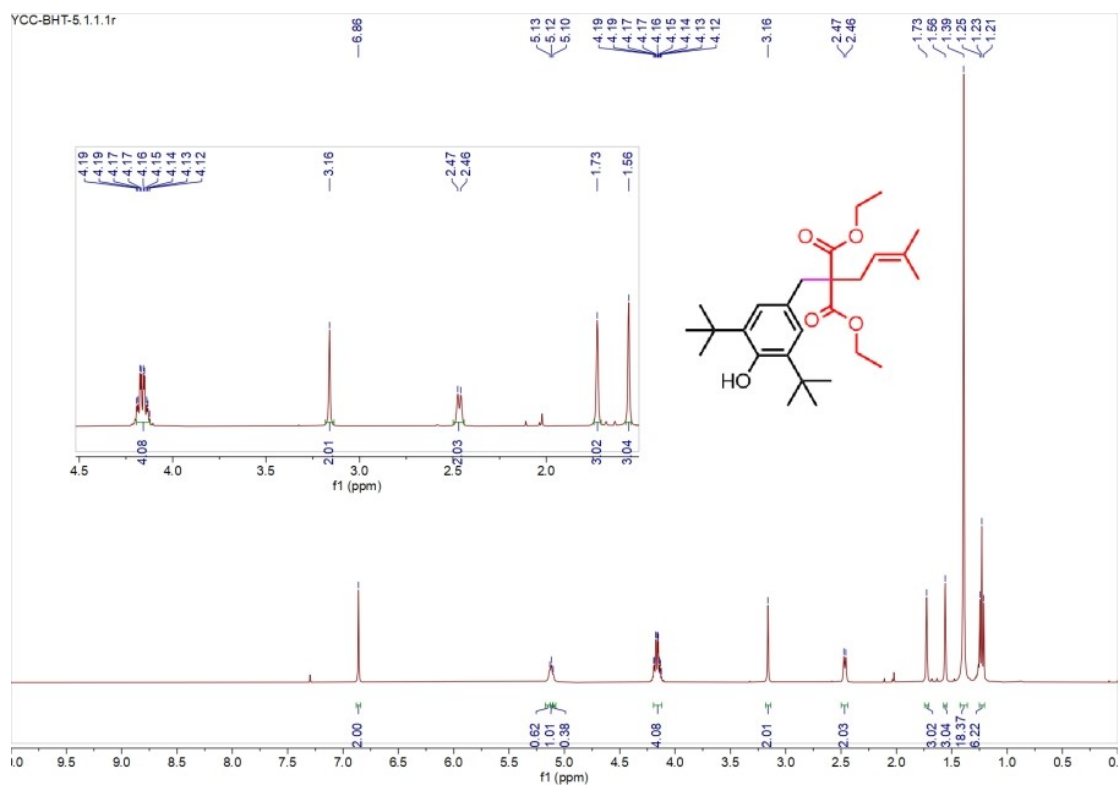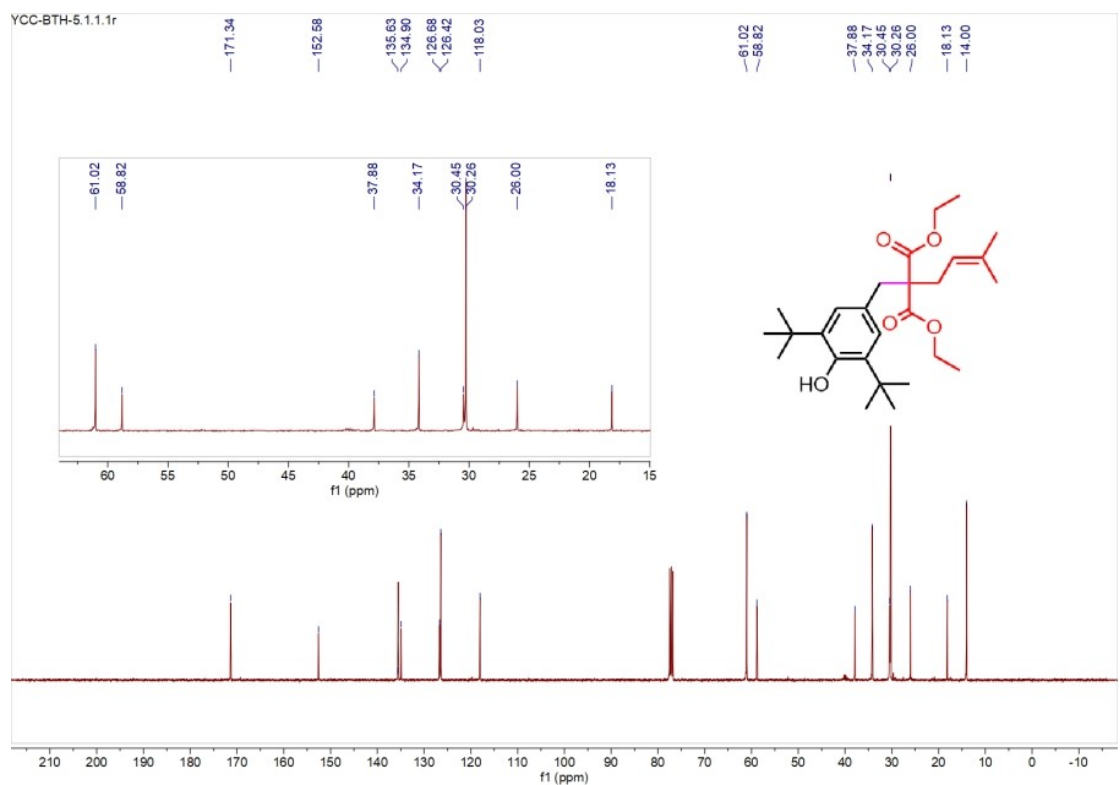

thyl 3-(4-methylpent-3-en-1-yl)-2-oxo-5,5-diphenyltetrahydrofuran-3-carboxylate

(32):

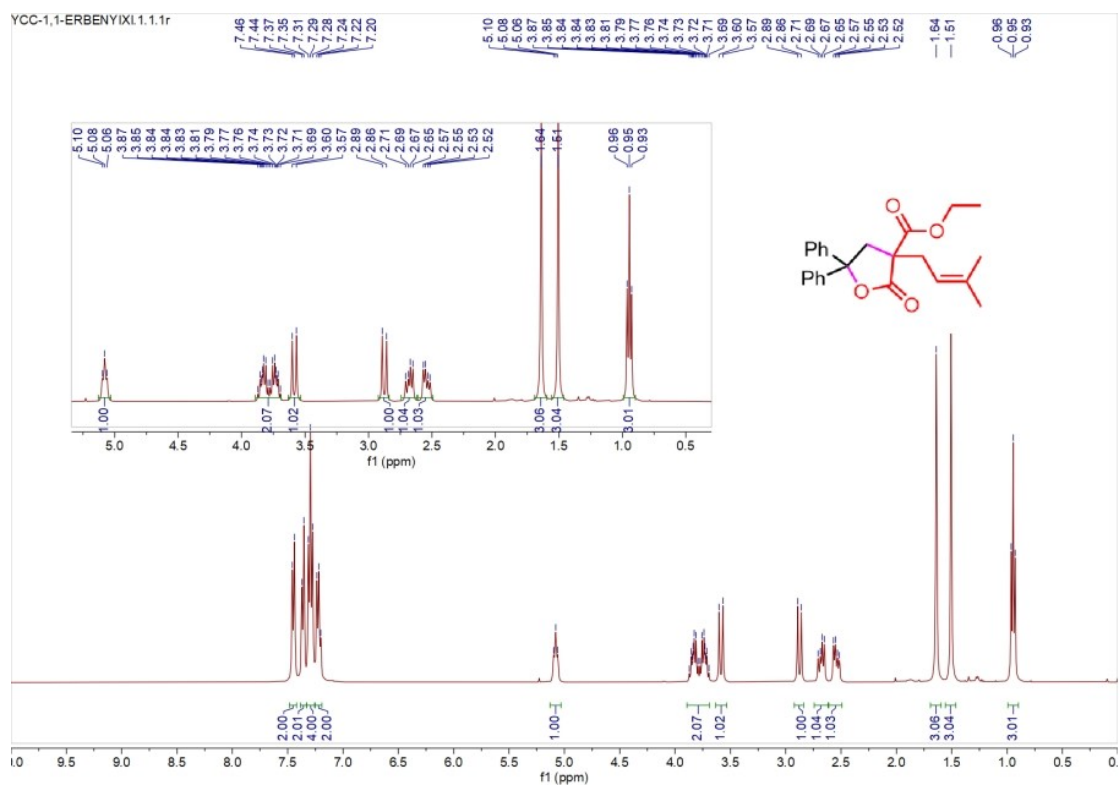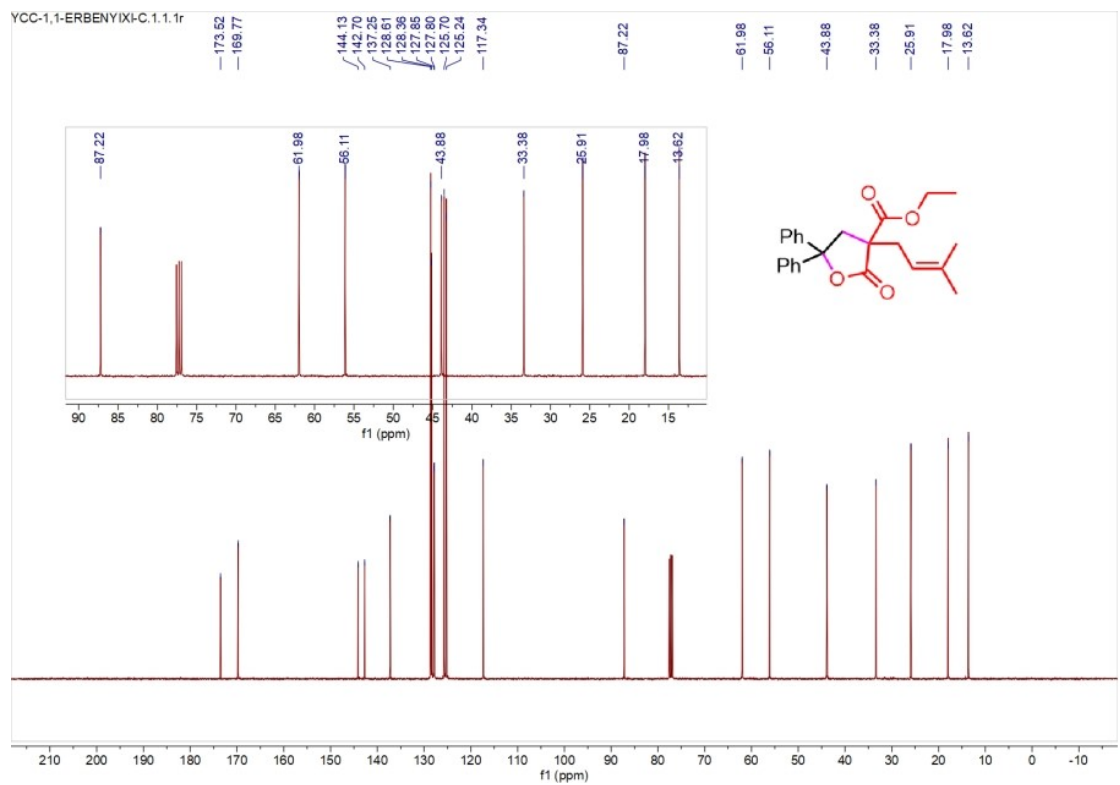

Supplement: d5qo00353a1.pdf [file d5qo00353a1.pdf]
